# Supplementary material
Source: MDPI journal article supplement (https://www.mdpi.com/2071-1050/14/14/8898)
Supplement: s1 [file s1]

Archive with 2 entries (2 files):
- Supplementary information.pdf
- Supplementary materials.xlsx
