# Supplementary material
Source: MDPI journal article supplement (https://www.mdpi.com/2071-1050/14/14/8898)
Supplement: s1 [file s1 › Supplementary materials.xlsx]

## Sheet: Contents
Table S1	Provincial electricity grid
Table S2	Lifecycle metal intensity associated with different forms of electricity production (kg/MWh)
Table S3	Lifecycle GHG intensity associated with different forms of electricity production (kg/MWh)
Table S4	Metal requirement and GHG emissions of electricity consumption in China from 2015 to 2019
Table S5	Metals and GHG intensity of electricity consumption or generation
Table S6	Cu transfer embodied in the provincial electricity transmission for the years from 2015 to 2019 (kg)
Table S7	Ni transfer embodied in the provincial electricity transmission for the years from 2015 to 2019 (kg)
Table S8	Cr transfer embodied in the provincial electricity transmission for the years from 2015 to 2019 (kg)
Table S9	Zn transfer embodied in the provincial electricity transmission for the years from 2015 to 2019 (kg)
Table S10	Metal transfer embodied in the provincial electricity transmission for the years from 2015 to 2019 (kg)
Table S11	GHG transfer embodied in the provincial electricity transmission for the years from 2015 to 2019 (Mt)
Table S12	Weighted average degree of metal transfer network and GHG transfer network from 2015 to 2019

## Sheet: Table S1
	Table S1 Provincial electricity grid
	Province	Abbreviation	Province	Abbreviation
	Beijing	BJ	Henan	HN
	Tianjin	TJ	Hubei	HUB
	Hebei	HB	Hunan	HUN
	Shanxi	SX	Guangdong	GD
	Inner Mongolia	IM	Guangxi	GX
	Liaoning	LN	Hainan	HAN
	Jilin	JL	Chongqing	CQ
	Heilongjiang	HLJ	Sichuan	SC
	Shanghai	SH	Guizhou	GZ
	Jiangsu	JS	Yunnan	YN
	Zhejiang	ZJ	Tibet	TB
	Anhui	AH	Shaanxi	SAX
	Fujian	FJ	Gansu	GS
	Jiangxi	JX	Qinghai	QH
	Shandong	SD	Ningxia	NX
			Xinjiang	XJ

## Sheet: Table S2
Table S2	Lifecycle metal intensity associated with different forms of electricity production (kg/MWh)
	Coal	Natural Gas	Other thermal (waste+biomass)	Hydro	Nuclear	Wind	Photovoltaic
Cu	0.00557927	0.006	0.011013	0.0025	0.000126	0.017	0.37
Ni	0.031	0.026	9.70309e-05	0	0.00054	0.01	0.0815217
Cr	0.006	0.007	9.70309e-06	0.00289575	0.000902	0.014	0.0851449
Zn	0.001	0	0.000776247	0.000772201	0	0.0726667	0.0634058
Note 1:	The data in blue are from de Koning, A., Kleijn, R., Huppes, G., Sprecher, B., van Engelen, G., Tukker, A., 2018. Metal supply constraints for a low-carbon economy? Resour. Conserv. Recycl. 129, 202–208. https://doi.org/10.1016/j.resconrec.2017.10.040
	The data in black are calculated based on the materials from Watari, T., McLellan, B.C., Giurco, D., Dominish, E., Yamasue, E., Nansai, K., 2019. Total material requirement for the global energy transition to 2050: A focus on transport and electricity. Resour. Conserv. Recycl. 148, 91–103. https://doi.org/10.1016/j.resconrec.2019.05.015.
Note 2:
	The data in orange are calculated based on the materials from IEA, 2021d. The Role of Critical World Energy Outlook Special Report Minerals in Clean Energy Transitions, International Energy Agency Publications
	These literatures provides material use per capacity for different forms of electricity production. For example, zinc demand per capacity for wind electricity is 5450t/GW. Thus, the metal use per unit of electricity generation is evaluated by metal demand per capacity/(power plant lifetime*annual utilization hours). Specifically, for wind power, zinc demand per unit of electricity generation=(545…
Note 3:	In China, offshore wind contributes around 3% of total installed wind power capacity and solar thermal power generation takes a 0.24% share of total installed solar power capacity. Therefore, the metal intensity of wind power in Table S2 refers to metal intensity of onshore wind power and metal intensity of solar power applied here is metal intensity of photovoltaic power.

## Sheet: Table S3
	Table S3 Lifecycle GHG intensity associated with different forms of electricity production (kg/MWh)
		Coal	Natural Gas	Other thermal (waste+biomass)	Hydro	Nuclear	Wind	Photovoltaic
	GHG	888	499	45	26	29	26	85

## Sheet: Table S4
Table S4	Metal requirement and GHG emissions of electricity consumption in China from 2015 to 2019
	2015	2016	2017	2018	2019
GHG (Mt)	3568.58	3654.94	3850.91	4162.02	4243.36
Cu (Mt)	0.0452561	0.0568715	0.077924	0.103521	0.122701
Ni (Mt)	0.129508	0.135164	0.146602	0.162768	0.16968
Cr(Mt)	0.033746	0.0376116	0.0441781	0.0524036	0.0577658
Zn(Mt)	0.0208669	0.0267129	0.0346785	0.0434138	0.0494163
Total metal(Mt)	0.229377	0.25636	0.303382	0.362106	0.399563
Electrcity consumption(TWh)	5693.5	5974.9	6362.7	6900.1	7248.4

## Sheet: Table S5
Table S5	Metals and GHG intensity of electricity consumption or generation
	Intensity of electricity consumption																														Intensity of electricity generation
	Cu(t/TWh)					Ni(t/TWh)					Cr(t/TWh)					Zn(t/TWh)					Metal(t/TWh)					GHG(Kt/TWh)					Cu(t/TWh)					Ni(t/TWh)					Cr(t/TWh)					Zn(t/TWh)
	2015	2016	2017	2018	2019	2015	2016	2017	2018	2019	2015	2016	2017	2018	2019	2015	2016	2017	2018	2019	2015	2016	2017	2018	2019	2015	2016	2017	2018	2019	2015	2016	2017	2018	2019	2015	2016	2017	2018	2019	2015	2016	2017	2018	2019	2015	2016	2017	2018
Total	7.94872	9.5184	12.247	15.0028	16.928	22.7467	22.622	23.0408	23.5892	23.4092	5.92711	6.29494	6.9433	7.59461	7.96945	3.66505	4.47085	5.45028	6.29176	6.81755	40.2876	42.9062	47.6814	52.4784	55.1243	626.782	611.715	605.232	603.182	585.42	7.88596	9.44467	12.1442	14.8014	16.7497	22.5645	22.4442	22.8465	23.2765	23.1669	5.8801	6.24587	6.88482	7.49347	7.88667	3.6345	4.43424	5.40232	6.20563
Beijing	6.91708	9.3023	11.5386	13.8093	15.6116	25.431	27.6358	27.0911	27.6368	26.824	6.35136	7.28278	7.63389	8.1542	8.32335	3.15634	4.48452	5.46358	5.50467	5.3673	41.8558	48.7054	51.7272	55.105	56.1262	618.981	671.128	648.359	644.202	610.484	6.42433	6.97227	8.0108	8.61409	10.1837	25.4913	25.2166	24.7283	24.9955	24.964	6.82858	6.92493	7.07267	7.20889	7.47238	0.707827	0.785884	0.967602	1.00357
Tianjin	5.39827	6.79185	11.606	12.5634	19.1481	23.9067	24.2047	29.2676	28.5778	31.9269	5.16605	5.50449	7.4322	7.51971	9.44415	1.89755	2.28929	4.59826	4.92164	6.98079	36.3686	38.7903	52.9041	53.5825	67.4999	648.004	648.021	765.19	741.118	797.106	6.22943	7.68813	9.53685	10.2242	14.0831	29.3918	29.6094	29.8326	30.0004	30.2865	6.22165	6.53924	6.94391	7.1081	7.94152	1.59986	1.85126	2.16751	2.42953
Hebei	10.1119	13.2996	17.6325	22.2485	26.1346	30.2926	30.0251	30.5816	31.0839	30.375	7.45503	8.15722	9.19464	10.198	10.8557	7.14798	8.62902	10.1793	11.1062	11.8975	55.0075	60.111	67.588	74.6366	79.2628	828.268	797.934	785.161	770.53	724.525	9.21281	12.6619	17.4613	23.3815	29.2285	28.3496	28.3971	28.9754	29.9191	30.5015	6.87252	7.6979	8.83628	10.1703	11.4776	6.66315	8.2516	9.89735	11.0909
Shanxi	7.48903	10.2044	13.5405	17.242	20.6723	30.1949	29.3153	28.859	29.2674	29.8728	6.72759	7.2205	7.82042	8.67164	9.45469	4.31223	5.60009	6.50806	7.75252	8.50777	48.7237	52.3403	56.728	62.9336	68.5076	836.778	792.458	757.813	746.745	743.462	7.18958	10.1315	13.7235	17.5437	20.8045	29.5686	29.4599	29.4632	29.8618	30.1348	6.54404	7.21636	7.94947	8.82435	9.49854	4.06874	5.48244	6.49273	7.78178
Inner Mongolia	12.0312	14.5554	16.3099	16.4485	18.5788	29.1706	29.2899	29.463	29.1582	29.8193	7.93118	8.56041	8.99369	8.99197	9.49668	9.34921	10.7224	11.5244	11.6242	11.8314	58.4821	63.1281	66.291	66.2228	69.7262	776.315	761.562	754.283	744.436	751.253	12.0492	14.5747	16.3043	16.4703	17.8526	29.1777	29.2964	29.4365	29.3136	29.5466	7.93645	8.56554	8.98734	9.02466	9.29835	9.35749	10.7302	11.5169	11.6671
Liaoning	7.39743	8.17321	10.1662	13.0915	15.1468	26.3418	25.3782	25.2922	25.1225	25.2257	6.38251	6.48759	6.94805	7.5266	7.9788	6.67261	7.26658	8.32611	8.98265	9.64286	46.7944	47.3056	50.7326	54.7232	57.9942	728.999	694.973	677.992	654.096	643.621	6.24677	6.64787	8.29856	11.8105	13.4908	25.6096	24.4299	24.144	23.8743	23.7153	5.98384	5.97598	6.33162	7.00917	7.36414	5.92639	6.36349	7.29539	8.02695
Jilin	7.20977	8.06854	12.5075	16.6376	22.1217	25.7	24.6609	25.3019	26.0805	26.9677	6.29966	6.45116	7.57397	8.58261	9.77662	7.17057	7.78196	9.95567	11.3034	12.5001	46.38	46.9625	55.3391	62.6041	71.3661	714.29	678.062	664.982	659.54	650.85	7.13275	8.00618	12.8587	16.9347	22.7661	25.2745	24.1834	24.9573	25.7421	26.8007	6.2361	6.37947	7.60685	8.60601	9.88562	7.16733	7.67701	9.96454	11.3157
Heilongjiang	7.24039	7.87418	9.87573	14.4162	18.0698	27.3963	27.0241	26.7013	27.1771	27.2906	6.4639	6.67183	7.15147	8.18516	8.96107	6.99554	8.13188	9.63891	10.956	12.0299	48.0961	49.702	53.3674	60.7344	66.3514	761.635	744.234	720.172	704.04	684.099	6.77533	7.36635	9.37481	14.2582	18.0301	27.1688	26.8238	26.4655	27.0113	27.0939	6.3119	6.52312	7.00394	8.12023	8.91937	6.75914	7.92911	9.48567	10.8984
Shanghai	6.88748	7.11809	8.53913	10.657	12.0832	21.9505	21.091	21.2208	21.8922	22.3731	6.15271	5.84691	6.13477	6.65984	7.0106	2.58994	2.67165	3.15266	3.77915	4.11902	37.5806	36.7277	39.0473	42.9881	45.586	618.138	583.283	576.47	579.207	580.439	6.49671	6.59533	7.46661	8.78582	9.73126	28.3822	28.1967	28.1617	28.1793	28.1322	5.9173	5.98513	6.178	6.48762	6.70418	1.82651	2.146	2.48352	2.78052
Jiangsu	7.87089	9.14044	11.6461	14.4056	16.759	26.3241	26.4932	26.4634	26.4896	26.4469	6.03388	6.38173	6.94992	7.60258	8.06744	2.32584	2.94938	3.66008	4.81569	5.44142	42.5547	44.9648	48.7195	53.3134	56.7147	730.128	722.436	699.969	678.245	663.028	8.35844	9.49568	11.9635	14.6444	16.9968	28.2387	28.3053	28.2768	28.0163	27.6867	6.25885	6.57628	7.14574	7.76373	8.18354	2.38162	2.98721	3.65756	4.78435
Zhejiang	5.55503	7.45597	11.3986	15.8741	17.756	21.0717	21.224	22.5704	23.5289	23.0498	4.93941	5.39055	6.33644	7.34655	7.67486	1.35725	1.97141	2.91276	4.08168	4.48199	32.9234	36.0419	43.2182	50.8312	52.9626	593.577	585.796	600.381	599.332	574.894	5.65063	7.26067	10.9515	15.2278	16.997	22.2017	22.3896	23.7194	23.9775	23.2072	4.99497	5.36981	6.23637	7.10443	7.36683	1.30598	1.71301	2.35847	3.1786
Anhui	6.60318	9.40243	15.2101	19.9927	21.8764	28.3008	28.5318	29.3264	30.1559	30.2539	5.79989	6.44184	7.69199	8.79185	9.17508	1.82167	2.65025	3.74401	4.80801	5.20631	42.5255	47.0264	55.9725	63.7484	66.5117	806.402	794.763	781.862	775.169	766.576	6.59887	9.381	15.1831	19.9588	21.8871	28.2976	28.4759	29.2555	30.1067	30.2554	5.7978	6.42618	7.67323	8.75454	9.11689	1.8202	2.64189	3.73364	4.67759
Fujian	4.73177	4.17376	5.1347	6.36077	6.6111	17.0567	13.374	15.6668	17.3449	16.6261	4.50208	4.06216	4.39136	4.74745	4.79914	2.44631	2.50076	2.96821	3.1247	3.49736	28.7368	24.1107	28.161	31.5778	31.5337	480.684	379.549	437.872	478.524	456.361	4.73358	4.1647	5.12664	6.35553	6.60434	17.0621	13.3537	15.6567	17.3415	16.62	4.50417	4.05945	4.38853	4.74602	4.79687	2.44887	2.5035	2.96793	3.12418
Jiangxi	6.56871	9.33915	14.8161	20.1357	20.2271	21.9235	22.0787	23.7885	25.767	24.805	5.17072	5.80563	7.10475	8.40881	8.35767	1.91335	2.82879	4.31744	5.59991	5.93709	35.5763	40.0522	50.0267	59.9114	59.3268	627.942	613.992	627.166	649.73	621.137	6.61512	9.4465	15.2479	20.779	20.7502	22.3307	22.3927	24.472	26.4626	25.2378	5.13803	5.78607	7.19928	8.53937	8.44622	1.88969	2.82014	4.39766	5.70615
Shandong	7.30633	9.33603	12.2854	16.3895	18.3414	28.8036	28.9676	28.8083	29.2997	28.5503	6.18468	6.66646	7.23131	8.19929	8.50647	3.35894	4.124	4.8178	6.17183	6.71396	45.6536	49.0941	53.1428	60.0603	62.1121	811.208	802.298	778.802	766.187	731.851	6.65095	8.47708	11.7016	15.845	17.6721	29.1048	29.242	29.5016	29.6427	28.7411	6.05669	6.47573	7.16813	8.0619	8.30304	2.95838	3.55316	4.37389	5.5574
Henan	6.65112	8.08509	12.5631	16.3172	19.0039	28.2992	28.6173	29.4334	29.3614	29.1635	5.98994	6.35817	7.44883	8.23787	8.83632	1.84569	2.47171	3.77579	4.80943	6.17276	42.7859	45.5323	53.2211	58.7258	63.1765	800.073	799.39	794.678	768.099	744.471	6.02594	7.31497	11.6117	16.0371	19.0911	29.1372	29.472	29.9274	29.9487	29.9094	5.929	6.23774	7.18554	8.15287	8.84418	1.38569	1.76065	2.78872	4.10838
Hubei	4.81961	6.10726	8.10858	10.867	11.8645	13.6905	13.3469	12.6253	14.7756	16.6229	4.43961	4.70397	5.01922	5.8429	6.2182	1.66902	2.25687	2.8038	3.62257	3.95716	24.6187	26.415	28.5569	35.1081	38.6627	399.411	380.511	346.565	389.745	435.701	4.5474	5.82481	8.11899	10.6996	11.634	12.4753	12.3352	12.3991	14.2964	16.1855	4.21376	4.50969	5.00919	5.74525	6.10517	1.55339	2.13418	2.81331	3.54534
Hunan	5.06796	5.55884	7.75714	12.4401	13.5559	15.03	14.8328	16.2801	18.952	17.8363	4.39569	4.55961	5.19618	6.4809	6.65014	2.09964	2.9566	4.10251	5.6169	6.12161	26.5933	27.9078	33.3359	43.4899	44.1639	437.559	426.685	452.906	498.025	458.101	5.19404	5.61285	6.96251	10.6963	11.6109	15.1283	14.8523	16.2328	18.7999	17.4464	4.39795	4.56013	4.9836	5.99513	6.14755	2.18303	3.07658	3.85534	4.7958
Guangdong	5.01475	5.92986	6.97551	8.28921	9.20188	19.0143	18.3197	18.9306	18.9506	17.8852	4.94238	5.21314	5.50603	5.73573	5.81625	1.93063	2.66491	3.11294	3.44715	3.70221	30.902	32.1276	34.5251	36.4227	36.6056	524.65	500.281	510.436	507.056	465.623	5.06701	5.28792	6.32659	7.63872	8.42503	22.522	21.2373	22.1495	22.1456	20.3754	5.15811	5.08138	5.36172	5.55688	5.54474	1.54438	1.691	1.99098	2.1967
Guangxi	4.54423	4.48699	4.856	6.03537	7.15812	7.12603	8.27792	9.52148	11.9675	14.0131	3.01002	3.06056	3.46655	4.01727	4.53844	1.11446	1.4494	2.05553	2.72651	3.43626	15.7947	17.2749	19.8996	24.7466	29.1459	222.561	250.357	277.175	337.71	388.547	4.90114	4.96046	5.47649	6.67691	7.68636	7.51742	9.00354	10.7607	13.3144	15.2143	3.21252	3.35262	3.91255	4.45294	4.8976	1.17328	1.56117	2.29632	3.00023
Hainan	8.18647	8.48808	7.98539	11.3299	17.6584	27.1524	21.0672	19.6322	19.2063	19.404	6.24711	5.52093	5.23187	5.67044	6.89724	2.95326	2.88349	2.71156	2.92878	3.92264	44.5392	37.9597	35.561	39.1354	47.8823	747.002	572.52	533.344	504.644	468.061	8.53966	8.44344	7.99609	11.3496	18.2391	28.2243	20.9482	19.6562	19.2331	20.0337	6.46999	5.4888	5.23764	5.67817	7.12165	3.0756	2.86684	2.71421	2.93211
Chongqing	4.55741	4.85767	5.3005	6.30033	6.94569	16.076	15.4251	15.2077	16.1635	16.1273	4.52772	4.60683	4.70911	4.99562	5.12201	1.20748	1.55385	1.82493	2.09819	2.4534	26.3686	26.4435	27.0422	29.5577	30.6484	460.661	440.974	432.579	451.533	446.326	4.8184	4.76241	4.92634	5.89619	6.43342	19.0875	18.286	18.7097	20.0987	19.8954	4.82787	4.77816	4.86372	5.18191	5.25951	1.17543	1.38169	1.5692	1.73533
Sichuan	3.38455	4.28528	4.90057	5.79929	6.51057	3.97586	3.28911	3.14989	4.10415	4.42388	3.34869	3.5088	3.61276	3.9133	4.09716	1.08653	1.46599	1.82194	2.33631	2.69508	11.7956	12.5492	13.4852	16.1531	17.7267	132.091	106.753	99.1295	119.877	123.8	3.31018	4.19862	4.72832	5.36043	5.94116	3.63477	3.01097	2.76708	3.37497	3.73848	3.30262	3.46544	3.54226	3.74905	3.91377	1.05726	1.43813	1.76991	2.20499
Guizhou	4.51767	4.98853	5.93996	7.61143	8.16743	17.3195	18.8417	19.0715	19.3072	20.0264	4.81089	5.1088	5.33767	5.70551	5.89358	2.13867	2.97507	3.35649	3.6956	3.94913	28.7867	31.9141	33.7056	36.3197	38.0365	502.694	540.903	541.08	537.305	553.736	4.50638	4.97447	5.92611	7.60346	8.17446	17.2981	18.8313	19.0611	19.3005	20.0453	4.80139	5.09995	5.3288	5.70058	5.89885	2.13301	2.96593	3.34615	3.68985
Yunnan	4.48362	6.89323	7.28143	7.74702	9.04199	2.80814	3.20979	3.16841	3.51759	3.83267	3.62975	4.31938	4.48581	4.63581	4.93425	3.59199	5.29868	5.94617	6.31924	6.68114	14.5135	19.7211	20.8818	22.2197	24.49	88.903	81.5012	75.8454	82.1737	82.9387	4.48389	6.89619	7.28251	7.74972	9.04041	2.80791	3.21061	3.16856	3.5188	3.83199	3.63003	4.32121	4.48645	4.63743	4.93339	3.59244	5.30114	5.94714	6.32145
Tibet	27.658	34.5027	43.4778	48.1609	59.8646	6.6951	8.36152	10.3419	10.9222	13.2893	8.55962	10.1716	12.1837	13.1503	15.7637	5.45888	6.61312	8.26869	9.13402	11.255	48.3716	59.649	74.2721	81.3675	100.173	58.7532	65.3276	66.0417	54.5035	49.2371	26.6961	31.8703	41.1419	47.1288	60.7806	5.39152	6.52868	8.58372	9.88307	12.9197	8.33899	9.48472	11.5578	12.8234	15.8964	5.14304	5.91639	7.47957	8.46149
Shaanxi	7.63364	10.2701	14.1732	21.8573	22.6138	25.8037	26.4334	26.2918	31.3873	28.6691	5.98739	6.54412	7.38686	9.8715	9.52655	2.68461	3.3152	4.49268	7.17004	7.03477	42.1093	46.5628	52.3446	70.2861	67.8442	722.565	722.773	693.878	797.013	710.842	7.14126	10.6902	15.0986	18.9365	21.4429	28.6646	29.5098	29.5001	29.2449	29.3744	6.18799	7.02724	7.96785	8.69876	9.24111	2.22392	3.21169	4.45746	5.75592
Gansu	23.2141	24.1798	26.6483	29.9771	35.4911	22.9582	23.3099	22.5263	22.4915	22.235	9.69578	9.98591	10.5995	11.3139	12.375	10.97	11.7454	13.8911	14.6081	15.1933	66.838	69.2211	73.6652	78.3907	85.2944	532.135	534.461	492.425	470.543	430.547	23.4772	24.1721	26.1873	28.0486	32.1943	22.6511	22.9659	21.914	22.1991	22.1784	9.76206	9.9967	10.5114	10.9572	11.7502	11.3511	12.0987	14.368	14.9517
Qinghai	46.9734	56.6589	63.7891	59.8966	66.6785	18.1313	22.0407	22.767	18.5702	18.9599	13.6889	16.0599	17.6709	16.5888	18.1662	10.06	12.1935	14.306	14.3217	17.088	88.8536	106.953	118.533	109.377	120.893	262.65	312.942	287.769	190.17	155.221	51.7024	63.4139	71.1121	63.4365	69.7989	17.3338	21.9041	22.8962	18.2845	18.868	14.5101	17.3319	19.0694	17.2535	18.7982	9.94158	12.3262	14.4188	14.3883
Ningxia	18.0236	23.8722	26.7143	29.0887	32.2081	29.4544	29.452	29.8372	29.4128	29.4602	8.90294	10.3498	10.992	11.4569	12.0626	8.43837	11.6876	12.4094	13.2137	13.3676	64.8193	75.3616	79.953	83.1721	87.0986	751.49	709.292	703.231	675.466	659.319	17.7756	23.8169	26.6402	28.9517	31.5684	29.626	29.8228	30.2547	30.1356	30.6271	8.84634	10.3562	10.9834	11.4545	11.9782	8.3082	11.659	12.258	13.0337
Xinjiang	14.727	15.526	19.7574	20.0637	20.4533	28.3615	27.9536	28.3823	28.5248	28.2181	8.11811	8.38746	9.54321	9.66202	9.69909	6.87943	8.44978	10.8954	11.3607	11.5824	58.0861	60.3169	68.5783	69.6112	69.9528	744.47	723.727	704.8	706.27	695.243	14.5235	15.4003	19.3976	19.6785	20.011	27.9903	27.7584	27.9066	28.0089	27.6855	8.00886	8.32429	9.37598	9.48187	9.50255	6.78421	8.38355	10.7024	11.1489
[truncated: 11 more columns]

## Sheet: Table S6
Table S6	Cu transfer embodied in the provincial electricity transmission for the years from 2015 to 2019 (kg)
2019		Beijing	Tianjin	Hebei	Shanxi	Inner Mongolia	Liaoning	Jilin	Heilongjiang	Shanghai	Jiangsu	Zhejiang	Anhui	Fujian	Jiangxi	Shandong	Henan	Hubei	Hunan	Guangdong	Guangxi	Hainan	Chongqing	Sichuan	Guizhou	Yunnan	Tibet	Shaanxi	Gansu	Qinghai	Ningxia	Xinjiang	Total outlow
2019	Beijing	0	101.813	1365.21	22.7161	0.795002	0.104103	0.00412039	0.0156286	0.120332	4.14789	0.0127506	0.00739774	3.28455e-06	0.0173843	0.984417	0.0114598	0.282889	0.00925616	0.0209212	9.33773e-05	1.17778e-06	0.00289354	0.0011676	3.6754e-07	5.40346e-11	4.25826e-07	0.0341188	9.53551e-05	3.92243e-06	0.000291209	5.09608e-07	1496.31
2019	Tianjin	134925	0	7665.95	127.556	4.4641	0.584558	0.0231369	0.0877575	0.67569	23.2912	0.0715973	0.0415398	1.84434e-05	0.0976166	5.5277	0.0643489	1.58848	0.0519752	0.117477	0.000524333	6.61348e-06	0.0162478	0.00655633	2.06381e-06	3.03416e-10	2.3911e-06	0.191584	0.000535438	2.20252e-05	0.0016352	2.86155e-06	142756
2019	Hebei	197527	560721	0	125106	4378.36	573.331	22.6925	86.072	662.712	22843.9	70.2222	40.742	0.0180892	95.7418	5421.54	63.113	1557.97	50.977	115.221	0.514262	0.00648645	15.9358	6.43041	0.00202417	2.97588e-07	0.00234518	187.904	0.525155	0.0216022	1.60379	0.00280659	919549
2019	Shanxi	544008	57473.5	747523	0	2547.9	333.639	13.2054	50.0879	22979.6	791243	2411.69	1411.18	0.62125	3328.13	173450	2185.94	54219.6	1770.35	4009.71	17.8599	0.225731	548.756	208.864	0.0693171	1.0335e-05	0.0759822	6098.11	16.6734	0.685861	2.96783	0.0891082	2.41585e+06
2019	Inner Mongolia	102187	200069	1.28287e+06	106947	0	812744	32168.5	122014	4049.39	175635	1392.65	313.275	0.358745	242.393	635190	489.548	1374.19	198.763	106.795	1.99135	0.00601212	255.486	623.474	0.0484438	1.15234e-06	0.235285	18432.7	66.8141	2.7484	2189.28	0.357076	3.49956e+06
2019	Liaoning	124657	2010.92	13219.5	63849	1414.69	0	57.448	27.812	337.761	11638	35.6624	20.7563	0.00918663	48.8415	81941.6	32.1528	795.121	25.9961	58.8029	0.262254	0.00331036	8.10101	3.20014	0.00102688	1.51758e-07	0.00116605	93.4838	0.259246	0.0106641	0.529335	0.00138549	300276
2019	Jilin	19571.7	4933.22	31677.3	11295.4	144633	347419	0	2880.04	140.822	5692.47	37.3275	10.1532	0.00961556	12.3774	26083.8	15.8272	141.649	8.21107	10.5959	0.0825137	0.000596504	7.06286	14.9504	0.00126899	4.77482e-08	0.00563621	441.846	1.59061	0.0654296	51.0203	0.00850071	595079
2019	Heilongjiang	3366.28	2723.23	17466.9	2458.71	83507.9	48987.3	175912	0	59.8645	2548.4	19.3021	4.54546	0.00497221	4.04078	9853.12	7.09858	31.1887	3.08889	2.37604	0.0309757	0.000133762	3.56595	8.43739	0.000668018	1.79247e-08	0.00318341	249.429	0.902848	0.0371386	29.4561	0.00482511	347247
2019	Shanghai	0.000186979	2.41766e-05	0.000323003	5.37622e-06	3.10489e-07	4.06573e-08	1.60922e-09	6.10374e-09	0	52645.6	11333.9	94.1222	2.91962	0.305667	9.47501e-05	0.190546	5.05936	0.160623	0.374266	0.00162086	2.10697e-05	0.0698189	0.226291	1.5347e-05	9.3794e-10	7.33455e-05	0.00360445	1.00051e-05	4.11558e-07	1.24375e-06	5.34703e-08	64082.9
2019	Jiangsu	5.54881e-05	7.1747e-06	9.58548e-05	1.59545e-06	9.20378e-08	1.2052e-08	4.7702e-10	1.80933e-09	181491	0	24340	14950.9	6.26998	0.0740261	2.81179e-05	0.0461498	1.22524	0.0389067	0.0911331	0.000392631	5.13042e-06	0.0183364	0.0671546	4.28128e-06	2.27204e-10	2.17662e-05	0.00106966	2.96068e-06	1.21787e-07	3.68047e-07	1.58228e-08	220790
2019	Zhejiang	0.00278111	0.000359602	0.00480433	7.99653e-05	4.59062e-06	6.01125e-07	2.37926e-08	9.02447e-08	220967	32707.7	0	176.751	1486.37	0.091213	0.00140923	0.0578249	1.50223	0.0498721	0.243527	0.000508757	1.37096e-05	0.402099	3.36586	0.000155335	2.94402e-10	0.00109094	0.0536125	0.000146561	6.02878e-06	1.82193e-05	7.83269e-07	255344
2019	Anhui	0.000433837	5.60957e-05	0.000749446	1.24741e-05	7.16139e-07	9.37758e-08	3.71166e-09	1.40782e-08	46522.6	575642	893918	0	230.273	0.0191434	0.000219831	0.012083	0.315694	0.0103602	0.0438609	0.000105396	2.46919e-06	0.063427	0.525054	2.43117e-05	6.09897e-11	0.000170181	0.00836323	2.28651e-05	9.40556e-07	2.84241e-06	1.22198e-07	1.51631e+06
2019	Fujian	5.23053e-05	6.76315e-06	9.03566e-05	1.50393e-06	8.63375e-08	1.13056e-08	4.47476e-10	1.69726e-09	4155.81	615.145	108520	3.32421	0	0.00171548	2.65038e-05	0.00108753	0.0282529	0.000950051	141.211	0.00573235	0.00794959	0.00756246	0.0633029	4.19877e-06	3.31714e-09	2.05177e-05	0.00100831	2.75643e-06	1.13386e-07	3.42657e-07	1.47313e-08	113435
2019	Jiangxi	1.30885e-05	1.69634e-06	2.26318e-05	3.78371e-07	1.43322e-07	1.87675e-08	7.4282e-10	2.8175e-09	35.3699	18.0222	0.576935	0.0321532	0.000148618	0	6.99793e-06	12.2539	325.511	10.3246	24.0623	0.104185	0.00135461	2.81062	0.0157688	0.000322649	6.02886e-08	5.11592e-06	0.000252272	1.06384e-05	4.37611e-07	1.32242e-06	5.68551e-08	429.086
2019	Shandong	1448.47	8563.55	880.894	14.6574	0.51297	0.0671716	0.00265866	0.0100842	0.0776436	2.6764	0.00822725	0.00477334	2.11934e-06	0.0112171	0	0.00739434	0.182533	0.00597248	0.0134993	6.02511e-05	7.59955e-07	0.00186704	0.000753388	2.37153e-07	3.48655e-11	2.74761e-07	0.0220149	6.15273e-05	2.53092e-06	0.000187901	3.28821e-07	10911.2
2019	Henan	0.000842998	0.000109257	0.00145766	2.437e-05	9.23103e-06	1.20877e-06	4.78432e-08	1.81468e-07	2278.09	1160.77	37.159	2.07091	0.00957215	1266.52	0.00045072	0	20965.4	664.981	1549.8	6.71029	0.0872474	181.025	1.01563	0.020781	3.88305e-06	0.000329504	0.0162482	0.000685196	2.81855e-05	8.51737e-05	3.6619e-06	28113.6
2019	Hubei	0.100915	0.0130791	0.174495	0.00291731	0.00110504	0.000144701	5.72728e-06	2.17234e-05	272708	138955	4448.27	247.907	1.14587	151614	0.0539553	94479.7	0	79604.4	185525	803.284	10.4443	21670.4	121.58	2.48768	0.000464836	0.0394447	1.94506	0.0820243	0.00337406	0.0101961	0.000438364	950194
2019	Hunan	0.00998206	0.00195318	0.0208426	0.000626131	0.0202629	0.00265335	0.00010502	0.000398337	339.152	172.81	5.60872	0.308654	0.00144481	188.552	0.0659072	117.503	3121.19	0	57723	17169.6	3.24957	27.0996	0.161094	3.83519	0.00993554	0.000875215	0.185885	1.65538	0.0680939	0.205772	0.00884687	78874.4
2019	Guangdong	8.66582e-09	1.25413e-09	1.5696e-08	3.17569e-10	4.09807e-09	5.36627e-10	2.12398e-11	8.05619e-11	8.16192e-05	3.87052e-05	2.33399e-06	6.91455e-08	6.01237e-10	4.03499e-05	1.66646e-08	2.51477e-05	0.00066791	0.346393	0	163.956	227.746	0.0014096	8.08362e-06	0.0365956	9.48763e-05	2.78606e-09	1.65735e-07	3.34246e-07	1.37492e-08	4.15485e-08	1.78632e-09	392.087
2019	Guangxi	7.01723e-05	1.01554e-05	0.000127099	2.57154e-06	3.31845e-05	4.34539e-06	1.71991e-07	6.52357e-07	0.660919	0.313419	0.0188997	0.000559912	4.86857e-06	0.326736	0.000134943	0.203636	5.40846	2804.95	74294.6	0	4.18249	11.4144	0.0654578	296.336	0.768269	2.25604e-05	0.00134205	0.00270659	0.000111335	0.000336443	1.44649e-05	77419.3
2019	Hainan	1.9305e-12	2.79385e-13	3.49662e-12	7.07456e-14	9.12935e-13	1.19546e-13	4.73162e-15	1.79469e-14	1.81825e-08	8.62244e-09	5.19949e-10	1.54037e-11	1.33939e-13	8.98882e-09	3.7124e-12	5.60221e-09	1.48792e-07	7.71667e-05	901.226	0.0365248	0	3.1402e-07	1.8008e-09	8.15247e-06	2.11358e-08	6.20657e-13	3.6921e-11	7.44607e-11	3.06294e-12	9.25585e-12	3.97941e-13	901.263
2019	Chongqing	2.30152	0.297591	3.97584	0.066176	0.0038303	0.000501563	1.98519e-05	7.52979e-05	1790.22	1150.87	374.082	2.06019	0.0963634	820.513	1.16631	512.126	13576.1	2697.51	1098.46	27.1272	0.0618389	0	2785.41	52.9273	1.56977e-05	0.902809	44.3672	0.123847	0.00509443	0.0153956	0.000661876	24940.8
2019	Sichuan	1258.15	162.68	2173.43	36.1754	2.07649	0.271909	0.0107622	0.0408208	172796	218556	191396	393.721	49.3037	503.347	637.519	759.046	4860.75	1160.45	417.999	11.7715	0.0235317	176083	0	69.6038	6.81179e-06	493.531	24253.7	66.282	2.72651	8.23964	0.354232	796153
2019	Guizhou	0.224086	0.0290044	0.387267	0.00645841	0.00128262	0.000167954	6.64763e-06	2.52143e-05	189.193	119.593	36.6013	0.214055	0.00942849	88.2005	0.11629	55.0425	1459.42	77423.7	454471	3578.63	25.5849	48275.9	270.664	0	0.00207085	0.0877647	4.31948	0.0864118	0.00355455	0.0107415	0.000461812	585999
2019	Yunnan	2.55149	0.329911	4.40765	0.0733628	0.0042113	0.000551455	2.18266e-05	8.27879e-05	140796	10308.9	2512.1	18.4368	0.647117	1.0803	1.29287	1.57642	10.8429	21.8127	1.31303e+06	9195.82	73.9181	357.18	3087.95	2.2122	0	1.00087	49.1859	0.134437	0.00553006	0.0167121	0.000718473	1.47947e+06
2019	Tibet	1846.44	238.747	3189.7	53.0906	3.04742	0.399049	0.0157944	0.0599078	3541.65	4482.23	3917.59	8.09441	1.00917	318.496	935.615	852.109	177.599	316.889	24.0726	3.17196	0.00135519	3927.48	31130.8	1.45851	1.83552e-06	0	35594.5	97.2734	4.00134	12.0922	0.51986	90678.1
2019	Shaanxi	192588	24901.9	332692	5537.47	317.853	41.6217	1.64739	6.24851	15186.5	19492.2	16262.1	37.2112	4.18911	32624.6	97586.7	88505.9	8670.41	31088.6	1675.93	310.864	0.0943483	49142.7	125557	9.49021	0.000179888	45.737	0	10145.8	417.348	1261.25	54.2225	1.05417e+06
2019	Gansu	20406.9	4010.27	42703.6	1288.87	41952.1	5493.47	217.432	824.715	8325.15	5042.98	158640	726.553	40.8655	3390.3	136324	11723.1	1754.25	459416	15509.3	4593.16	0.873109	5715.98	18739.8	2.25917	0.00265792	1710.03	379846	0	140982	426032	18316.6	1.91373e+06
2019	Qinghai	5975.87	1157.52	12413.7	368.812	11770.6	1541.32	61.0057	231.393	2817.77	2040.89	45067.8	354.436	11.6095	994.524	38374.3	3956.3	518.428	128938	4354.76	1289.1	0.245156	2136.39	9479.96	0.831659	0.000745966	55910.7	111399	961591	0	119531	8971.62	1.53126e+06
2019	Ningxia	5750.35	10159	61080.5	4984.99	287758	37680.8	1491.41	5656.89	41295.3	14312.4	1.07163e+06	52.1173	276.052	161.108	867723	445.474	109.257	3083.53	111.237	30.829	0.0062622	241.562	642.834	0.0540467	1.78398e-05	11.1795	17869.4	22067.3	907.736	0	117.934	2.45565e+06
2019	Xinjiang	892.488	175.387	1867.62	56.3684	1834.76	240.255	9.50931	36.0686	2934.93	27784	49464.2	227739	12.742	347.265	5962.06	840759	3370.73	20196.9	921.792	201.934	0.0518932	278.431	819.764	0.10207	0.000116853	74.7874	16612.4	149892	6165.8	18632.3	0	1.37728e+06
2019	Total inflow	1.35641e+06	877402	2.5588e+06	322147	580126	1.25506e+06	209954	131814	1.1464e+06	2.11484e+06	2.58587e+06	246608	2124.54	196051	2.07949e+06	1.04497e+06	117055	809486	2.11607e+06	37406.9	346.821	308891	193507	441.778	0.784594	58248.3	611178	1.14395e+06	148483	567752	27461.7
2018		Beijing	Tianjin	Hebei	Shanxi	Inner Mongolia	Liaoning	Jilin	Heilongjiang	Shanghai	Jiangsu	Zhejiang	Anhui	Fujian	Jiangxi	Shandong	Henan	Hubei	Hunan	Guangdong	Guangxi	Hainan	Chongqing	Sichuan	Guizhou	Yunnan	Tibet	Shaanxi	Gansu	Qinghai	Ningxia	Xinjiang	Total outlow
2018	Beijing	0	85.4276	2034.55	18.3683	1.12936	0.15094	0.00960639	0.0218255	0.0756061	2.90865	0.0114392	0.00595397	3.22392e-06	0.0143268	0.73778	0.0108383	0.226626	0.00976675	0.0189767	3.96776e-05	1.32681e-06	0.0019982	0.000952532	1.05546e-07	7.12898e-11	1.88954e-07	0.0251729	0.000165631	8.9386e-06	0.000576477	3.07175e-07	2143.71
2018	Tianjin	111105	0	2802.28	25.2995	1.55552	0.207897	0.0132313	0.0300613	0.104136	4.00621	0.0157558	0.00820067	4.44045e-06	0.0197329	1.01618	0.014928	0.312142	0.0134522	0.0261374	5.46498e-05	1.82748e-06	0.00275221	0.00131197	1.45373e-07	9.81906e-11	2.60255e-07	0.0346718	0.000228131	1.23115e-05	0.000794008	4.23086e-07	113940
2018	Hebei	369274	244930	0	52663.8	3238	432.761	27.5425	62.576	216.77	8339.38	32.7974	17.0706	0.00924331	41.0762	2115.29	31.0744	649.76	28.0023	54.4081	0.11376	0.0038041	5.72904	2.73101	0.00030261	2.04395e-07	0.000541751	72.1732	0.474881	0.0256279	1.65282	0.000880702	682237
2018	Shanxi	416114	26131.7	608723	0	1106.18	147.842	9.40921	21.3775	14724.3	565764	2184.6	1158.1	0.615686	2789.97	132604	2095.15	44261.4	1899.09	3705.94	7.71648	0.259112	377.922	155.451	0.0197663	1.38644e-05	0.0298945	4098.76	25.6524	1.38438	2.69402	0.0475743	1.82811e+06
2018	Inner Mongolia	143930	171825	1.21427e+06	79338.7	0	717018	45633.7	103679	1372.21	69767.8	1262.41	143.018	0.355784	264.133	283958	577.659	1035.05	250.276	94.4232	0.982073	0.00660188	310.445	751.274	0.0211782	1.76452e-06	0.172046	20083.6	164.293	8.86633	2686.46	0.304693	2.85842e+06
2018	Liaoning	109148	37232.6	2564.1	39.4356	1279.11	0	172.286	24.7336	0.411381	19.8701	0.313481	0.0407225	8.83486e-05	0.0789326	113070	0.14971	0.499932	0.0705335	0.0437088	0.000278283	3.05603e-06	0.0761789	0.18001	5.16242e-06	4.99999e-10	4.11907e-05	4.81184	0.0393179	0.00212186	0.64053	7.29178e-05	263558
2018	Jilin	15430.3	7146.31	18938.1	1221.87	82454.8	253917	0	1686.71	21.1002	1072.68	19.4039	2.1989	0.00546862	4.06149	18053.6	8.87971	15.9387	3.84791	1.45379	0.0150992	0.000101646	4.77162	11.5467	0.00032551	2.71292e-08	0.00264426	308.676	2.5251	0.136271	41.2893	0.00468297	400367
2018	Heilongjiang	2512.05	1671.84	8099.47	527.383	35641.8	33353.6	126928	0	9.11753	463.552	8.38704	0.950241	0.00236372	1.75501	3497.79	3.83788	6.87999	1.66288	0.627608	0.00652509	4.38811e-05	2.06249	4.99114	0.0001407	1.17238e-08	0.001143	133.427	1.09149	0.0589041	17.8477	0.00202425	212888
2018	Shanghai	0.000152276	0.000100809	0.00240082	2.44371e-05	1.4169e-06	1.8937e-07	1.20522e-08	2.73824e-08	0	49331.7	13097.9	103.591	3.69139	0.0812603	3.80527e-06	0.0590841	1.30529	0.0556133	0.109452	0.000226089	7.65266e-06	0.0883962	0.666363	1.05258e-05	4.06219e-10	5.30326e-05	0.018684	0.000117029	6.41185e-06	9.83635e-06	2.17116e-07	62539.3
2018	Jiangsu	3.43413e-05	2.27457e-05	0.0005417	5.35295e-06	3.19659e-07	4.27226e-08	2.71903e-09	6.17757e-09	115349	0	26237.9	14763.9	7.39465	0.0136123	8.5249e-07	0.0099184	0.218481	0.00935661	0.0186412	3.80601e-05	1.30335e-06	0.0194034	0.15036	2.34847e-06	6.83836e-11	1.19664e-05	0.00421592	2.6399e-05	1.44637e-06	2.21885e-06	4.89763e-08	156358
2018	Zhejiang	0.00192731	0.00127829	0.0304432	0.000275698	1.79585e-05	2.40016e-06	1.52755e-07	3.47057e-07	195269	30904.9	0	1097.1	1441.05	0.0269626	4.69563e-05	0.0240485	0.396132	0.0270636	0.101396	0.000114719	7.08942e-06	1.00581	8.45133	0.000127844	2.06119e-10	0.000672599	0.236965	0.0014826	8.12309e-05	0.000124614	2.75057e-06	228723
2018	Anhui	0.000265126	0.000175843	0.0041878	3.79579e-05	2.4704e-06	3.30171e-07	2.10133e-08	4.77418e-08	34986	528014	698674	0	196.908	0.00466273	6.46061e-06	0.00399736	0.0698471	0.00436742	0.0151709	1.83967e-05	1.06072e-06	0.13847	1.16257	1.75917e-05	3.30538e-11	9.25236e-05	0.0325972	0.00020395	1.11743e-05	1.71422e-05	3.78374e-07	1.26187e+06
2018	Fujian	3.42054e-05	2.26868e-05	0.000540299	4.89303e-06	3.18724e-07	4.25976e-08	2.71107e-09	6.1595e-09	3465.6	548.493	90747.6	19.4711	0	0.000478527	8.33372e-07	0.000426807	0.00703046	0.000488779	69.1642	0.00613415	0.00483582	0.017851	0.149992	3.72542e-06	1.10214e-08	1.19371e-05	0.00420561	2.63129e-05	1.44167e-06	2.21163e-06	4.88165e-08	94850.5
2018	Jiangxi	7.4836e-05	6.63994e-06	0.000155777	0.000617824	2.41591e-07	3.22888e-08	2.05498e-09	4.66887e-09	37.4719	13.6685	0.750192	0.0281201	0.000211427	0	2.36131e-05	13.0808	291.419	12.2326	24.3899	0.0497501	0.00170529	2.08104	0.0140361	0.000102179	8.93873e-08	1.13743e-06	0.000397846	3.22464e-05	1.74224e-06	2.69512e-06	5.98049e-08	395.189
2018	Shandong	1092.1	1716.53	13757.4	124.205	7.63664	1.02064	0.0649575	0.147582	0.511242	19.668	0.0773509	0.0402602	2.17998e-05	0.0968761	0	0.0732873	1.53242	0.0660419	0.128318	0.000268296	8.97177e-06	0.0135116	0.00644093	7.13691e-07	4.82055e-10	1.27769e-06	0.170217	0.00111998	6.04419e-05	0.00389808	2.07709e-06	16721.5
2018	Henan	0.00767965	0.00170145	0.040335	0.048997	3.5598e-05	4.7577e-06	3.02798e-07	6.87951e-07	2956.38	1078.39	59.1882	2.21856	0.016681	1428.08	0.001906	0	22991.8	965.104	1924.26	3.92509	0.134541	164.189	1.11556	0.0080617	7.05231e-06	9.13212e-05	0.249686	0.00390968	0.000211151	0.000326718	7.25091e-06	31575.2
2018	Hubei	0.552358	0.0490087	1.14977	4.5601	0.00178316	0.000238321	1.51676e-05	3.44605e-05	276576	100886	5537.1	207.552	1.56052	133600	0.174286	96548.4	0	90287.6	180019	367.201	12.5866	15360	103.599	0.75417	0.00065976	0.00839526	2.93647	0.238008	0.0128593	0.0198925	0.000441414	899517
2018	Hunan	0.00310423	0.00204042	0.0469497	0.00138686	0.00256091	0.000342267	2.17832e-05	4.94909e-05	56.5822	20.6402	1.23578	0.0425736	0.000348281	27.3323	0.0858973	19.7599	439.989	0	55246	5707.58	3.86269	3.19215	0.0362647	1.35579	0.010255	0.00244291	0.358656	3.56825	0.192564	0.29808	0.00661757	61532.2
2018	Guangdong	4.69032e-09	3.09631e-09	7.32651e-08	1.07342e-09	7.7447e-10	1.03508e-10	6.58767e-12	1.4967e-11	7.62598e-05	1.51911e-05	3.54982e-06	3.18278e-08	1.00045e-09	1.18284e-05	2.48916e-08	8.55915e-06	0.000190344	0.42314	0	306.681	241.844	0.00239765	1.65811e-05	0.0728419	0.000551021	2.02393e-09	5.68149e-07	1.0329e-06	5.57438e-08	8.62865e-08	1.91558e-09	549.024
2018	Guangxi	1.54257e-05	1.01832e-05	0.000240957	3.53031e-06	2.5471e-06	3.40422e-07	2.16657e-08	4.92241e-08	0.250806	0.0499612	0.0116748	0.000104676	3.29031e-06	0.0389015	8.18644e-05	0.0281496	0.626009	1391.64	69388.5	0	4.8515	7.88549	0.0545325	239.565	1.81222	6.65638e-06	0.00186855	0.00339703	0.000183332	0.000283782	6.30004e-06	71035.3
2018	Hainan	1.37175e-12	9.05555e-13	2.14273e-11	3.13937e-13	2.26504e-13	3.02724e-14	1.92665e-15	4.37731e-15	2.23032e-08	4.44285e-09	1.03819e-09	9.30845e-12	2.92594e-13	3.45935e-09	7.27988e-12	2.50323e-09	5.56685e-08	0.000123753	1011.62	0.0896927	0	7.01225e-07	4.84936e-09	2.13036e-05	1.61153e-07	5.91925e-13	1.66162e-10	3.02084e-10	1.6303e-11	2.52356e-11	5.60237e-13	1011.71
2018	Chongqing	0.687637	0.454357	10.8207	0.122649	0.00639533	0.00085474	5.43989e-05	0.000123593	1882.01	1042.92	408.13	2.21654	0.115023	733.579	0.0178352	531.756	11797	4090.93	1129.21	16.0823	0.0789523		3002.72	19.385	2.88956e-05	0.238979	84.1938	0.536697	0.0293972	0.0451049	0.000995692	24753.3
2018	Sichuan	292.97	194.321	4627.87	41.792	2.72996	0.364861	0.0232211	0.0527579	156769	209712	161670	461.806	45.5635	614.24	7.13364	1137.62	4118.23	1759.26	410.883	6.94805	0.0287281	152501	0	19.4146	1.24837e-05	102.247	36022.8	225.375	12.3482	18.943	0.418123	730775
2018	Guizhou	0.0572492	0.037827	0.900793	0.0102463	0.000639212	8.54312e-05	5.43716e-06	1.23531e-05	158.715	87.4998	33.9532	0.185911	0.00956905	62.087	0.00510355	45.0033	998.469	62153.4	377705	4207.44	26.4084	37076.2	249.422	0	0.00755962	0.0199537	7.00865	0.195045	0.0105618	0.0163159	0.000361753	482812
2018	Yunnan	0.240974	0.159833	3.80651	0.0343769	0.00224554	0.000300119	1.91007e-05	4.33963e-05	117610	8577.63	2364.58	18.0296	0.66641	0.568014	0.00587102	0.981088	4.39823	59.2712	1.07004e+06	6467.24	74.815	154.631	1056.73	888.046	0	0.0840999	29.6294	0.185516	0.0101642	0.0155928	0.000344175	1.20735e+06
2018	Tibet	166.252	110.321	2625.61	23.7402	4.24222	0.566975	0.0360844	0.0819831	761.667	1010.68	885.071	2.25774	0.24944	207.939	95.2691	543.807	74.6033	224.122	14.601	0.873535	0.00102087	946.262	6148.86	0.1025	1.5695e-06	0	20431.5	208.396	513.307	327.495	0.789881	35328.7
2018	Shaanxi	24344.3	16147.1	384552	3472	226.763	30.307	1.92885	4.38231	14732.7	19206.3	14642.5	42.7324	4.1267	30310.7	589.938	79549.6	8460.34	30421.7	1841.48	118.521	0.128753	45228	111962	3.10458	0.000212949	21.7014	0	18724.8	1010.52	1564.33	34.7265	807249
2018	Gansu	2575.76	1748.37	40225.8	390.989	2204.93	294.691	18.7552	42.6115	5004.74	2741.65	88759	101.01	25.015	3130.11	73937.1	8883.61	1000.42	408069	15451.2	1588.84	1.08032	4799.43	12714	0.712137	0.00285472	2102.13	308321	0	165818	256679	5698.44	1.41233e+06
2018	Qinghai	510.398	345.959	7976.57	77.1872	410.241	54.8289	3.48952	7.92811	1077.09	710.255	16659.8	65.1947	4.69525	621.509	13747.4	2161.06	202.148	75815.3	2872.03	295.192	0.200807	1074.01	3548.76	0.152037	0.00053038	53751.2	61197.7	570581	0	47724.5	4441.78	865938
2018	Ningxia	928.809	1047.91	9674	388.135	23603.3	3154.59	200.77	456.145	36104.1	6156.11	942292	204.138	265.567	237.904	799239	632.57	72.4994	5525.44	214.076	21.5142	0.0149678	356.468	894.33	0.0294756	3.86551e-05	27.5866	23456	40238.2	2171.5	0	74.6246	1.89764e+06
2018	Xinjiang	137.675	93.4506	2150.07	20.905	117.853	15.7512	1.00246	2.27758	1283.18	9537.78	16984.2	73132.4	4.78667	362.05	3951.93	646575	3188.86	21942.8	1088.28	85.4588	0.0760901	278.922	679.733	0.0391633	0.000153546	112.359	16479.8	164232	8862.97	13719.5	0	985042
2018	Total inflow	1.19756e+06	510427	2.32303e+06	138379	150300	1.00842e+06	172997	105988	980425	1.61503e+06	2.08256e+06	91545.3	2002.4	174437	1.44487e+06	839359	99614.4	704901	1.78231e+06	19202.5	366.388	258654	141298	1172.78	1.8351	56117.8	490735	794409	178400	322785	10251.1
2017		Beijing	Tianjin	Hebei	Shanxi	Inner Mongolia	Liaoning	Jilin	Heilongjiang	Shanghai	Jiangsu	Zhejiang	Anhui	Fujian	Jiangxi	Shandong	Henan	Hubei	Hunan	Guangdong	Guangxi	Hainan	Chongqing	Sichuan	Guizhou	Yunnan	Tibet	Shaanxi	Gansu	Qinghai	Ningxia	Xinjiang	Total outlow
2017	Beijing	0	70.3743	1381.7	10.9392	0.819893	0.113567	0.00450819	0.0186242	0.0226764	1.38304	0.00619241	0.00211921	3.71301e-06	0.000692881	0.363003	0.157884	0.00924657	0.000720973	0.000875974	4.55777e-06	5.91083e-08	0.000347941	0.000290377	6.57113e-09	2.08845e-10	3.7339e-07	0.0144131	0.000334474	3.2069e-05	0.000534592	1.33707e-06	1465.93
2017	Tianjin	45729.2	0	218.634	1.73098	0.129737	0.0179704	0.000713358	0.00294702	0.00358822	0.218846	0.000979862	0.000335336	5.87531e-07	0.000109639	0.0574402	0.024983	0.00146314	0.000114084	0.000138611	7.21202e-07	9.35306e-09	5.50567e-05	4.59481e-05	1.03979e-09	3.30468e-11	5.90838e-08	0.00228067	5.29258e-05	5.07447e-06	8.45917e-05	2.11572e-07	45950
2017	Hebei	262913	209969	0	32638.4	2446.23	338.838	13.4506	55.5672	67.6574	4126.43	18.4757	6.32289	0.0110781	2.06728	1083.06	471.064	27.5881	2.1511	2.61356	0.0135986	0.000176356	1.03812	0.86637	1.96056e-05	6.23111e-07	0.00111405	43.003	0.997937	0.0956811	1.59501	0.00398927	514229
2017	Shanxi	278640	22932.1	444919	0	606.7	84.0366	3.33594	13.7814	5356.98	326939	1436.47	500.961	0.861314	154.626	84394.3	37298.1	2183.74	160.761	206.477	1.01709	0.0139325	70.7523	51.1848	0.0012462	4.66047e-05	0.0643083	2536.53	57.5668	5.51945	3.64407	0.230124	1.20856e+06
2017	Inner Mongolia	160660	165293	1.23149e+06	74997.3	0	651329	25855.4	106813	242.922	9563.36	708.142	14.7533	0.424607	227.596	36951.1	1687.63	114.444	240.071	20.5537	1.49813	0.00138691	281.906	426.383	0.00751192	6.86469e-05	0.584963	21262.7	524.944	50.3309	2987.03	2.09847	2.49174e+06
2017	Liaoning	133159	681.325	1184.98	18.7482	675.62	0	198.113	15.5024	0.0514186	2.38202	0.106174	0.00366422	6.36629e-05	0.0331777	49773	0.357468	0.0231757	0.034989	0.00358972	0.000218386	2.42224e-07	0.0407223	0.0614204	1.08315e-06	1.00069e-08	8.42456e-05	3.06284	0.0756013	0.00724855	0.429187	0.000302217	185713
2017	Jilin	20667.7	370.118	2161.1	123.424	7661.92	199749	0	787.825	0.398352	15.7372	1.15454	0.0242759	0.000692268	0.370922	7688.15	2.76747	0.187508	0.391251	0.033588	0.00244155	2.26643e-06	0.459375	0.694779	1.22406e-05	1.11876e-07	0.000953178	34.6469	0.855379	0.0820126	4.86711	0.00341939	239272
2017	Heilongjiang	2376.85	117.722	810.623	48.4547	3029.52	22554.7	85535.3	0	0.15679	6.17861	0.456311	0.00953147	0.000273607	0.146642	873.606	1.08925	0.0738477	0.154679	0.013253	0.000965254	8.94276e-07	0.181627	0.274709	4.83978e-06	4.42297e-08	0.000376878	13.6991	0.338209	0.032427	1.92445	0.001352	115372
2017	Shanghai	0.000107144	8.54531e-05	0.00167774	1.47672e-05	9.95763e-07	1.37927e-07	5.47521e-09	2.26191e-08	0	32925.4	12557.3	52.3057	7.52945	0.0365477	0.000967745	0.028069	0.619806	0.0387251	0.0591541	0.000245699	3.99156e-06	0.0682241	0.527258	8.62806e-06	1.12584e-08	1.93897e-05	0.0134061	0.000349165	3.55749e-05	0.00313347	1.3973e-06	45543.9
2017	Jiangsu	1.67649e-05	1.33719e-05	0.000262537	2.2987e-06	1.55818e-07	2.1583e-08	8.56765e-10	3.53946e-09	88990.5	0	24870.2	8765.07	14.9123	0.00541947	0.00190604	0.00416441	0.0918892	0.00575112	0.0103045	3.65987e-05	6.95316e-07	0.010442	0.0811616	1.32763e-06	1.67702e-09	3.07395e-06	0.00209261	0.000136017	1.33638e-05	0.00617445	5.43964e-07	122641
2017	Zhejiang	0.000156386	0.000124869	0.00245163	1.97214e-05	1.45483e-06	2.01514e-07	7.99938e-09	3.3047e-08	117877	11933.4	0	546.227	2118.41	0.00743355	0.270647	0.00604703	0.123223	0.00922312	0.247229	7.53352e-05	1.66824e-05	0.0638119	0.564088	9.1536e-06	3.45199e-09	3.44415e-05	0.0187904	0.0129973	0.00124837	0.87677	5.19587e-05	132478
2017	Anhui	2.12504e-05	1.6967e-05	0.000333122	2.69145e-06	1.9768e-07	2.73815e-08	1.08695e-09	4.49038e-09	20821.4	361422	457818	0	274.511	0.00130093	0.0350714	0.00104291	0.0216942	0.0015529	0.0325756	1.20314e-05	2.19811e-06	0.00889764	0.0779527	1.26563e-06	5.51299e-10	4.64118e-06	0.00255825	0.00168704	0.000162056	0.113615	6.74419e-06	840337
2017	Fujian	1.64109e-06	1.31036e-06	2.5727e-05	2.06953e-07	1.52667e-08	2.11466e-09	8.39442e-11	3.4679e-10	1236.99	125.227	37074.7	5.73202	0	7.80069e-05	0.00284013	6.34569e-05	0.00129309	0.000117898	120.333	0.00867244	0.00811971	0.00066975	0.00591945	3.66356e-06	3.97387e-07	3.61424e-07	0.000197183	0.000136392	1.31002e-05	0.00920069	5.45247e-07	38563.1
2017	Jiangxi	0.000139353	2.18987e-05	0.000427566	0.00115998	4.07193e-07	5.6402e-08	2.23895e-09	9.24955e-09	59.3048	30.3622	1.36184	0.0467068	0.000816569	0	4.08273e-05	21.7747	487.453	29.7397	45.8315	0.188704	0.00309258	8.33856	0.0716314	7.87908e-05	8.64674e-06	2.76054e-06	0.00182606	0.000163861	1.59953e-05	9.6235e-06	6.55242e-07	684.481
2017	Shandong	135.113	107.904	2118.55	16.7731	1.25714	0.174131	0.00691237	0.0285563	0.0347696	2.1206	0.00949477	0.00324937	5.69313e-06	0.00106239	0	0.242083	0.0141777	0.00110546	0.00134312	6.98839e-06	9.06304e-08	0.000533495	0.000445233	1.00755e-08	3.20221e-10	5.72517e-07	0.0220995	0.000512847	4.91712e-05	0.000819686	2.05011e-06	2382.26
2017	Henan	0.00595622	0.000935991	0.018275	0.0495796	1.74042e-05	2.41073e-06	9.56971e-08	3.95343e-07	2534.8	1297.74	58.2077	1.99634	0.0349017	1223.87	0.00174504	0	20834.7	1271.13	1958.93	8.06555	0.132183	356.406	3.06166	0.00336767	0.000369578	0.000117991	0.0780491	0.00700373	0.000683671	0.000411327	2.80063e-05	29549.2
2017	Hubei	0.419648	0.0659456	1.28757	3.49315	0.00122622	0.000169849	6.74238e-06	2.78541e-05	178590	91432.6	4101.05	140.653	2.45901	86227.9	0.122947	65572.4	0	89558.1	138017	568.262	9.313	25110.7	215.711	0.23727	0.0260388	0.00831308	5.49898	0.493451	0.0481684	0.0289802	0.00197319	679558
2017	Hunan	0.00141187	0.0011055	0.0217044	0.00045711	1.29171e-05	1.78921e-06	7.1025e-08	2.93418e-07	14.6461	7.48707	0.378595	0.0115239	0.000227008	7.05999	0.0640071	5.3744	120.156	0	37306.4	5537.81	2.51733	2.13305	0.0248938	2.27825	0.253753	0.0039703	0.17291	3.65828	0.350739	0.207305	0.014624	43011
2017	Guangdong	7.68609e-09	6.11198e-09	1.19999e-07	1.29079e-09	7.12521e-11	9.86943e-12	3.9178e-13	1.61852e-12	0.000915342	6.40275e-05	2.50268e-05	1.01806e-07	1.50062e-08	8.42158e-06	3.48439e-08	6.42507e-06	0.000143197	0.478065	0	196.36	183.858	0.00266304	3.40951e-05	0.080782	0.00899756	3.38792e-09	9.58637e-07	1.9894e-06	1.9087e-07	1.1274e-07	7.95274e-09	380.789
2017	Guangxi	2.69168e-05	2.14042e-05	0.000420238	4.52035e-06	2.49526e-07	3.45628e-08	1.37202e-09	5.66807e-09	3.20554	0.224225	0.0876441	0.000356525	5.2552e-05	0.0294924	0.000122024	0.0225006	0.501476	1674.19	46928.9	0	3.16663	9.32597	0.119401	282.899	31.5095	1.18645e-05	0.00335716	0.00696689	0.000668429	0.000394817	2.78506e-05	48934.2
2017	Hainan	1.71176e-12	1.36119e-12	2.67249e-11	2.8747e-13	1.58685e-14	2.19801e-15	8.7253e-17	3.60459e-16	2.03855e-07	1.42595e-08	5.57369e-09	2.2673e-11	3.34202e-12	1.87556e-09	7.76004e-12	1.43092e-09	3.18912e-08	0.000106469	606.824	0.0437311	0	5.93082e-07	7.59327e-09	1.79909e-05	2.00384e-06	7.5452e-13	2.13497e-10	4.43056e-10	4.25085e-11	2.51082e-11	1.77115e-12	606.867
2017	Chongqing	0.585065	0.465431	9.13801	0.0958567	0.00542557	0.000751519	2.98325e-05	0.000123244	1618.11	1132.27	527.297	1.81301	0.316171	580.958	0.0325636	443.296	9877.14	5044.32	1115.26	31.5273	0.0752549	0	2874.91	0.0594642	0.00144464	0.105479	73.012	1.67818	0.172338	0.0952319	0.00671676	23332.7
2017	Sichuan	207.768	165.927	3257.73	25.8263	1.93312	0.267765	0.0106293	0.0439117	149009	184717	178326	309.565	106.925	467.87	11.2111	892.279	3359.88	1970.98	395.935	12.3536	0.0267166	112135	0	16.5878	0.000566063	37.6125	26040.5	591.142	60.7571	33.5439	2.36603	662157
2017	Guizhou	0.047307	0.0376327	0.738859	0.00776328	0.000438689	6.07647e-05	2.41214e-06	9.965e-06	131.441	91.8174	42.5866	0.146993	0.0255352	47.289	0.0061818	36.0828	803.989	49694.7	291172	2196.57	19.6475	27035.3	232.075	0	0.100651	0.00873501	5.9034	0.338546	0.0333819	0.0191953	0.00135401	371511
2017	Yunnan	0.283615	0.226499	4.44697	0.0352581	0.00263882	0.000365514	1.45096e-05	5.99418e-05	111346	6347.99	2568.26	10.1065	1.53994	0.735139	0.0154895	1.29137	6.22871	107.495	905214	4302.3	61.0813	204.403	1399.7	1559.93	0	0.0513434	35.5466	0.80738	0.0829788	0.0463905	0.00323151	1.03317e+06
2017	Tibet	1.441	1.1508	22.5943	0.179105	0.0134074	0.00185711	7.37206e-05	0.000304554	729.788	904.183	885.511	1.51719	0.530958	2.85048	19.7763	8.76988	16.5977	71.6266	4.55535	0.447041	0.000307382	549.447	5018.86	0.0813505	2.04843e-05	0	180.548	1130.22	22493.4	64.0469	20.5963	32128.7
2017	Shaanxi	15269.7	12194.6	239424	1897.51	142.073	19.6792	0.781191	3.22725	6143.06	7433.96	7175.15	12.4582	4.30227	20151.8	822.657	54753	4618.04	21053.5	1306.94	131.346	0.0881886	25276.4	38374.3	0.674637	0.00601849	48.5071	0	43429.9	4164.01	2461.15	173.612	506486
2017	Gansu	1014.73	810.377	15910.6	126.096	9.44128	1.30775	0.051913	0.214462	1722.81	971.611	31098.5	6.1353	18.6469	1339.84	47149.1	5143.63	343.2	148184	6255.91	924.246	0.422131	1904.88	4623.74	0.45501	0.0423506	2924.55	127040	0	258400	152728	10774	819426
2017	Qinghai	77.2594	61.7006	1211.4	9.60074	0.718842	0.0995698	0.00395256	0.0163288	296.409	278.832	2558.54	0.809397	1.53412	102.388	3579.15	800.28	32.5205	11251.1	475.589	70.1753	0.0320914	269.039	1488.44	0.0529414	0.00321556	46198.8	9672.64	204593	0	11593.8	3735.8	298360
2017	Ningxia	116.901	93.3589	1832.97	14.5246	1.08768	0.150659	0.00598059	0.024707	16164.2	1685.33	483209	74.789	289.735	130.72	751932	374.7	30.4436	2040.74	88.5397	12.7286	0.00597442	166.879	275.883	0.00969819	0.000583247	38.2118	12411.7	35207.5	3375.54	0	140.743	1.30971e+06
2017	Xinjiang	45.6173	36.4299	715.247	5.67971	0.424427	0.0587892	0.00233371	0.00964102	649.833	336.721	1411.14	0.726602	0.846131	336.593	2119.54	702037	4720.13	6948.49	723.575	43.3698	0.0488248	166.112	208.547	0.021215	0.00198728	131.47	5710.98	121158	11616.1	6865.72	0	865988
2017	Total inflow	921015	412906	1.94667e+06	109939	14577.9	874077	111606	107690	703607	1.04373e+06	1.24645e+06	10452.2	2843.56	111005	986397	869551	47577.9	339304	1.43197e+06	14038.3	280.442	193549	55196.2	1863.38	31.9557	49380	205070	406702	300167	176747	14849.5
2016		Beijing	Tianjin	Hebei	Shanxi	Inner Mongolia	Liaoning	Jilin	Heilongjiang	Shanghai	Jiangsu	Zhejiang	Anhui	Fujian	Jiangxi	Shandong	Henan	Hubei	Hunan	Guangdong	Guangxi	Hainan	Chongqing	Sichuan	Guizhou	Yunnan	Tibet	Shaanxi	Gansu	Qinghai	Ningxia	Xinjiang	Total outlow
2016	Beijing	0	52.704	2652.65	3.06419	0.462875	0.0639839	0.00243837	0.0110765	0.0114217	0.272803	0.00156227	0.00057918	2.58816e-06	0.00315336	89.8081	0.013936	0.0545951	0.00371083	0.00518257	1.91157e-05	6.0671e-07	0.00110278	7.97221e-05	1.61116e-08	1.80641e-09	1.1791e-07	0.00489855	0.000121054	1.21754e-05	0.000339756	4.07151e-07	2799.14
2016	Tianjin	24355.7	0	1533.61	1.77154	0.267608	0.0369918	0.00140972	0.00640378	0.00660336	0.157719	0.000903216	0.000334848	1.49633e-06	0.00182309	51.9219	0.00805702	0.0315638	0.00214539	0.00299626	1.10516e-05	3.50765e-07	0.000637563	4.60907e-05	9.31478e-09	1.04436e-09	6.81689e-08	0.00283206	6.99865e-05	7.03909e-06	0.000196427	2.35391e-07	25943.5
2016	Hebei	189431	55438.8	0	3223.19	486.893	67.304	2.56489	11.6512	12.0144	286.958	1.64334	0.609233	0.00272246	3.31698	94468.2	14.6592	57.428	3.90339	5.45149	0.0201076	0.000638192	1.16	0.0838588	1.69476e-05	1.90015e-06	0.000124029	5.15273	0.127336	0.0128071	0.357385	0.000428278	343523
2016	Shanxi	219348	6639.28	334162	0	58.3097	8.06025	0.307168	1.39534	6549.73	156568	878.144	332.4	1.45479	1790.5	11314.1	7988.62	31314.7	2125.71	2972.47	10.9502	0.347979	617.045	28.3893	0.00921825	0.00103478	0.0365765	1580.06	37.4439	3.76604	2.11651	0.125938	784335
2016	Inner Mongolia	117318	28799.5	1.01943e+06	68754.3	0	523166	19937.3	90567	336.519	6182.14	298.069	13.2132	0.4938	345.581	55940.6	452.684	1504.6	141.396	145.006	0.728379	0.0169755	250.483	248.572	0.000771377	6.88309e-05	0.444544	17608.8	457.928	46.0572	2748.55	1.54019	1.95469e+06
2016	Liaoning	78589.7	16565.9	5739.18	1139.2	224.74	0	99.6886	5.412	4.24746	101.423	0.584488	0.215329	0.000968301	1.17618	39702.3	5.18307	20.3012	1.38042	1.92717	0.00711098	0.000225609	0.413138	0.0330816	5.99565e-06	6.71979e-07	5.00011e-05	2.06529	0.0513556	0.00516523	0.16455	0.000172728	142205
2016	Jilin	9259.46	1955.66	1634.9	197.815	3615.62	117740	0	243.916	0.813582	17.6693	0.350729	0.0375969	0.00058104	0.464666	4674.58	1.03266	3.79013	0.294788	0.361856	0.00151855	4.23616e-05	0.285652	0.239599	1.4295e-06	1.43501e-07	0.000427431	16.9408	0.440282	0.0442824	2.62591	0.00148084	139367
2016	Heilongjiang	1353.73	288.105	782.393	64.964	2562.82	16686.6	63461.8	0	0.296427	5.82496	0.211029	0.0124264	0.000349604	0.252751	681.636	0.390148	1.3466	0.117995	0.129302	0.000607833	1.51371e-05	0.176073	0.168618	6.18822e-07	5.74395e-08	0.000301406	11.9403	0.310479	0.0312271	1.86121	0.00104426	85905.1
2016	Shanghai	0.000296143	6.10094e-05	0.00307067	0.000787437	5.35817e-07	7.40669e-08	2.82262e-09	1.2822e-08	0	7769.81	12931.3	20.8183	21.4228	0.0319086	0.000113449	0.0166595	0.559778	0.0396987	0.0558193	0.000204502	6.53462e-06	0.120316	1.24511	2.54336e-07	1.93252e-08	3.55379e-05	0.0216106	0.000519197	5.70935e-05	2.87662e-05	1.74626e-06	20745.4
2016	Jiangsu	3.93184e-05	8.10012e-06	0.000407688	0.000104547	7.11396e-08	9.83374e-09	3.74754e-10	1.70235e-09	70012.3	0	21803.6	9365.99	36.1212	0.00423645	1.50624e-05	0.00221185	0.0743208	0.00527074	0.0114329	2.71514e-05	1.33842e-06	0.0159742	0.165312	3.37678e-08	2.56578e-09	4.71831e-06	0.0028692	6.8933e-05	7.58021e-06	3.81924e-06	2.31848e-07	101218
2016	Zhejiang	2.99594e-05	6.17203e-06	0.000310645	7.96613e-05	5.42061e-08	7.49299e-09	2.85551e-10	1.29714e-09	53347.1	3871.95	0	764.145	3733.64	0.00322804	1.14771e-05	0.00168536	0.0566301	0.00401613	0.456631	2.06885e-05	5.34566e-05	0.0121718	0.125962	2.573e-08	1.95504e-09	3.5952e-06	0.00218624	5.25247e-05	5.77588e-06	2.91014e-06	1.76661e-07	61717.5
2016	Anhui	4.87746e-06	1.00482e-06	5.05737e-05	1.2969e-05	8.82488e-09	1.21988e-09	4.64883e-11	2.11177e-10	8685.04	178340	248519	0	411.712	0.000525532	1.86849e-06	0.00027438	0.00921951	0.000653836	0.050636	3.36814e-06	5.92783e-06	0.0019816	0.0205069	4.1889e-09	3.18285e-10	5.85307e-07	0.000355925	8.55115e-06	9.40327e-07	4.73777e-07	2.87608e-08	435956
2016	Fujian	2.26159e-07	4.65917e-08	2.34501e-06	6.0135e-07	4.09193e-10	5.65634e-11	2.15558e-12	9.79188e-12	402.709	29.2287	17012.9	5.76841	0	2.43679e-05	8.66385e-08	1.27225e-05	0.000427491	3.03171e-05	98.7491	1.56174e-07	0.0115603	9.18831e-05	0.000950867	1.94231e-10	1.47583e-11	2.71396e-08	1.65036e-05	3.965e-07	4.36012e-08	2.19682e-08	1.33358e-09	17549.4
2016	Jiangxi	0.181059	0.00548879	0.276257	1.45142	4.82055e-05	6.66352e-06	2.5394e-07	1.15354e-06	135.356	59.4149	3.61507	0.12724	0.00598896	0	0.00935505	30.5388	1036.26	70.2264	98.3577	0.361759	0.0115145	19.7606	0.202147	0.000304068	3.41858e-05	5.79916e-06	0.00481201	0.000115183	1.2376e-05	6.4163e-06	3.87403e-07	1456.17
2016	Shandong	0	0	0	0	0	0	0	0	0	0	0	0	0	0	0	0	0	0	0	0	0	0	0	0	0	0	0	0	0	0	0	0
2016	Henan	3.16969	0.0960888	4.83625	25.409	0.000843903	0.000116654	4.44557e-06	2.01944e-05	2369.59	1040.14	63.2867	2.22752	0.104845	1023.72	0.163773	0	18141.1	1229.41	1721.89	6.33308	0.201577	345.936	3.53885	0.00532314	0.000598469	0.000101522	0.0842409	0.00201643	0.000216659	0.000112326	6.78202e-06	25981.3
2016	Hubei	173.586	5.26224	264.854	1391.51	0.0462158	0.00638848	0.000243459	0.00110593	129769	56962.6	3465.86	121.989	5.74176	56063.2	8.96892	29278.3	0	67327.8	94298.1	346.827	11.0392	18944.9	193.803	0.291518	0.0327748	0.00555981	4.6134	0.110428	0.0118652	0.00615147	0.000371413	458639
2016	Hunan	0.0848669	0.0025728	0.129492	0.680313	2.25957e-05	3.12344e-06	1.19031e-07	5.40709e-07	63.4835	27.85	1.6957	0.0596428	0.0028092	27.4095	0.00438507	14.3142	485.719	0	39177.4	3621.75	4.5864	9.37084	0.0963381	2.89475	0.342251	2.76351e-06	0.00228305	5.46506e-05	5.8737e-06	3.04414e-06	1.83811e-07	43437.9
2016	Guangdong	0	0	0	0	0	0	0	0	0	0	0	0	0	0	0	0	0	0	0	0	247.156	0	0	0	0	0	0	0	0	0	0	247.156
2016	Guangxi	0.000297449	1.98833e-05	0.00100075	0.00205311	1.74626e-07	2.41388e-08	9.19906e-10	4.17875e-09	6.58237	0.224602	0.206287	0.000545607	0.000341749	0.0827569	3.58655e-05	0.0432178	1.46534	1878.5	36764.3	0	4.3039	17.818	0.260288	474.142	56.0586	7.42915e-06	0.00451934	0.000108577	1.19393e-05	6.01578e-06	3.65186e-07	39204
2016	Hainan	0	0	0	0	0	0	0	0	0	0	0	0	0	0	0	0	0	0	796.85	0	0	0	0	0	0	0	0	0	0	0	0	796.85
2016	Chongqing	1.01817	0.163582	8.23327	4.11525	0.00143667	0.000198593	7.56818e-06	3.43791e-05	878.976	742.399	565.368	1.76437	0.936625	166.268	0.30295	86.8203	2931.96	5073.74	549.741	26.1401	0.0643567	0	3176.17	0.255815	0.00247021	0.090654	55.1285	1.32447	0.145645	0.0733825	0.0044547	14271.2
2016	Sichuan	138.909	40.6084	2043.86	3.7231	0.356644	0.0492995	0.00187876	0.00853441	136155	157555	152250	385.264	252.227	278.098	75.8334	142.175	962.881	1298.55	160.095	6.69015	0.0187419	76715.1	0	0.0632958	0.000632211	24.8573	15115.2	363.146	39.9334	20.1201	1.2214	544028
2016	Guizhou	0.0811872	0.0123507	0.621624	0.349273	0.00010847	1.4994e-05	5.71409e-07	2.59567e-06	69.5774	57.067	42.2378	0.135215	0.0699738	14.1068	0.0228494	7.36628	248.908	44425.9	276681	9783.58	32.3903	23175.1	236.682	0	0.924537	0.00675536	4.10811	0.0986979	0.0108533	0.00546837	0.000331958	354780
2016	Yunnan	0.217109	0.0634394	3.19297	0.00673316	0.000557159	7.70169e-05	2.93504e-06	1.33327e-05	110387	1869.45	2939.52	4.95135	4.8698	0.471379	0.118468	0.241394	2.15897	106.802	759267	3181.75	88.8853	169.323	1360.48	1320.2	0	0.0388306	23.6121	0.567285	0.0623816	0.0314305	0.00190799	880730
2016	Tibet	0.773654	0.22623	11.3864	0.0188753	0.00198687	0.000274648	1.04666e-05	4.75453e-05	506.625	586.14	569.123	1.43418	0.942845	1.47412	11.7453	1.03904	4.03157	4.92325	0.641693	0.0253646	7.51213e-05	285.71	3239.81	0.000236091	2.39692e-06	0	84.2098	621.62	18826.6	34.4405	2.09074	24795.1
2016	Shaanxi	11379.8	3329.47	167576	222.442	29.2412	4.04205	0.154039	0.699734	5319.91	4313.14	3253.85	10.2402	5.39053	19465.6	6210.18	9914.71	19807.3	4117.66	2034.52	21.2116	0.238176	15988.6	17478	0.0290311	0.00200447	28.5556	0	29370.8	2954.04	1627.29	98.7852	324562
2016	Gansu	976.612	285.733	14381.3	19.1057	2.50946	0.346887	0.0132195	0.0600508	851.104	558.283	10861.5	4.82733	17.9938	1671.17	43559.3	1938.89	1711.16	355.433	175.749	1.83097	0.0205744	1454.74	2437.69	0.00256231	0.000173024	2252.13	106365	0	237052	130586	7927.35	565448
2016	Qinghai	45.829	13.4084	674.861	0.897444	0.11776	0.0162781	0.000620345	0.00281797	158.867	163.871	641.446	0.562747	1.06266	78.4573	2038.73	90.8684	80.928	17.7703	8.36538	0.0915422	0.000979313	135.153	875.479	0.000175258	8.65063e-06	31808.6	4991.35	110311	0	6111.72	371.018	158621
2016	Ningxia	57.2613	16.7533	843.212	1.11949	0.147136	0.0203389	0.000775096	0.00352094	3759.89	294.647	157650	53.5035	261.173	97.9558	651032	63.4913	99.8123	20.7454	10.2836	0.106867	0.00120387	81.4855	99.6785	0.000146967	1.00988e-05	28.2688	6236.49	29582.5	2975.27	0	99.4973	853366
2016	Xinjiang	20.4914	5.77663	290.744	7.06796	0.0507335	0.00701297	0.000267258	0.00121404	640.41	284.827	235.271	0.683075	0.389765	302.908	876.823	492886	4806.14	330.528	456.449	1.70266	0.0534353	120.274	49.9977	0.00145173	0.000160899	45.3319	2140.99	47441.9	4771.48	2628.49	0	558345
2016	Total inflow	652454	113438	1.55204e+06	75062.2	6981.58	657672	83501.8	90830.2	530422	577688	633989	11091	4755.76	81332.3	910738	542918	83222.8	128531	1.21542e+06	17010.1	389.349	138333	29430.9	1797.9	57.3654	34188.4	154246	218190	266669	143764	8501.64
2015		Beijing	Tianjin	Hebei	Shanxi	Inner Mongolia	Liaoning	Jilin	Heilongjiang	Shanghai	Jiangsu	Zhejiang	Anhui	Fujian	Jiangxi	Shandong	Henan	Hubei	Hunan	Guangdong	Guangxi	Hainan	Chongqing	Sichuan	Guizhou	Yunnan	Tibet	Shaanxi	Gansu	Qinghai	Ningxia	Xinjiang	Total outlow
2015	Beijing	0	23.4353	1329.76	1.29952	0.190346	0.0272279	0.00118249	0.00557893	0.00479737	0.119908	0.000517343	7.49099e-05	2.87972e-07	0.00157621	37.6062	0.0060992	0.0241122	0.00196792	0.00222396	9.52374e-06	4.45483e-06	0.000364231	6.94071e-05	2.06724e-07	9.54699e-10	6.89787e-08	0.00292984	6.14592e-05	5.81397e-06	0.000172199	1.17218e-07	1392.49
2015	Tianjin	21946.8	0	470.48	0.459783	0.0673461	0.00963346	0.000418376	0.00197388	0.00169735	0.0424245	0.00018304	2.65038e-05	1.01887e-07	0.000557677	13.3054	0.00215795	0.0085311	0.000696268	0.000786856	3.36958e-06	1.57616e-06	0.000128868	2.45569e-05	7.31409e-08	3.37781e-10	2.44053e-08	0.0010366	2.17448e-05	2.05704e-06	6.09256e-05	4.14729e-08	22431.1
2015	Hebei	110909	33815	0	1875.1	274.652	39.2874	1.70623	8.0499	6.92218	173.016	0.746479	0.108088	0.000415517	2.27433	54262.4	8.80061	34.7917	2.83954	3.20897	0.0137419	0.00642792	0.525553	0.100148	0.000298285	1.37754e-06	9.953e-05	4.22749	0.0886801	0.00838904	0.248468	0.000169136	201423
2015	Shanxi	110153	4446.8	252318	0	36.1177	5.16643	0.224375	1.05859	4561.12	114171	487.744	71.3249	0.271496	1481.11	7136.01	5801.38	22939	1869.26	2115.59	9.04614	4.23775	330.041	37.2691	0.187244	0.000906822	0.0352177	1556.04	30.4614	2.88169	0.973471	0.0581827	529566
2015	Inner Mongolia	80831.1	22643.4	880266	60229.5	0	436639	18963	89466.5	339.568	5669.27	105.848	3.55432	0.0589189	405.215	38521.1	389.059	1467.01	168.665	138.089	0.818459	0.276608	298.764	487.294	0.170837	8.20458e-05	0.514877	20858.3	474.155	44.8533	2745.67	0.902906	1.66116e+06
2015	Liaoning	53030.3	14906	796.769	137.251	635.904	0	454.099	18.9413	0.530398	12.6869	0.0712041	0.00792838	3.96348e-05	0.233677	26553	0.665698	2.61734	0.223516	0.241971	0.00108215	0.000484693	0.0954998	0.10527	5.44592e-05	1.08479e-07	0.00011081	4.50207	0.101847	0.00963434	0.572082	0.000193959	96554.9
2015	Jilin	5990.35	1683.7	1128.62	86.419	3677.25	101889	0	366.679	0.460164	8.1086	0.132976	0.0050808	7.40195e-05	0.504744	2997.14	0.533679	2.02424	0.224127	0.190052	0.00108732	0.000380695	0.36361	0.587448	0.000207901	1.08997e-07	0.000620654	25.1449	0.571544	0.0540658	3.30765	0.00108836	117862
2015	Heilongjiang	1081.49	303.93	703.603	49.7305	2399.03	17852.9	66390.2	0	0.275702	4.67656	0.0841328	0.00293145	4.68313e-05	0.321335	539.992	0.316998	1.19735	0.136176	0.112622	0.000660754	0.000225594	0.235445	0.38305	0.000134628	6.62368e-08	0.000404724	16.3961	0.37271	0.0352569	2.1579	0.00070973	89347.6
2015	Shanghai	0.00273273	0.000195788	0.0111093	0.0270742	1.59023e-06	2.27472e-07	9.87899e-09	4.66086e-08	0	10897.4	11449.9	24.6294	6.37342	1.49872	0.000320857	0.691403	23.5747	1.91941	2.17477	0.0092896	0.00435631	0.409163	1.11339	0.000244618	9.31228e-07	0.000400036	0.0327337	0.000641827	9.17141e-05	1.98318e-05	1.24336e-06	22409.8
2015	Jiangsu	0.7496	0.0302928	1.71886	8.41938	0.000246044	3.51951e-05	1.5285e-06	7.2114e-06	56016.4	0	13283.2	2257.01	7.39393	466.006	0.0486149	215.005	7332.6	596.345	676.195	2.88591	1.35449	98.8572	0.416684	0.0560545	0.000289295	0.000149861	0.0228177	0.000447162	5.38955e-05	1.4036e-05	7.4391e-06	80964.8
2015	Zhejiang	0.000864751	6.46174e-05	0.00366649	0.00845456	5.24835e-07	7.50745e-08	3.26044e-09	1.53826e-08	35084	3581.49	0	182.572	912.25	0.468018	0.000106012	0.215907	7.36159	0.599444	0.767947	0.00290123	0.00153828	0.130997	0.386998	7.86633e-05	2.90831e-07	0.000139047	0.0113766	0.000223067	3.18763e-05	6.8925e-06	4.31382e-07	39770.3
2015	Anhui	0.020442	0.000829293	0.0470554	0.229466	6.73568e-06	9.63498e-07	4.18442e-08	1.97419e-07	5294.71	98596	176656	0	98.3334	12.7008	0.00133113	5.85984	199.846	16.2531	18.4389	0.0786543	0.0369352	2.69771	0.0529417	0.00153014	7.88463e-06	1.90258e-05	0.00184322	3.61346e-05	4.89208e-06	1.12247e-06	2.4835e-07	280902
2015	Fujian	7.95904e-06	5.94729e-07	3.37459e-05	7.78145e-05	4.8305e-09	6.90974e-10	3.00086e-11	1.41579e-10	322.908	32.9635	15083.8	1.68037	0	0.00430756	9.75717e-07	0.00198718	0.0677549	0.00551719	85.4208	2.67025e-05	0.171107	0.00120568	0.00356187	7.24005e-07	2.67677e-09	1.27977e-06	0.000104708	2.05307e-06	2.93385e-07	6.34375e-08	3.97038e-09	15527.1
2015	Jiangxi	0.00986476	0.00039853	0.0226132	0.110804	3.23694e-06	4.63025e-07	2.01089e-08	9.48727e-08	11.9302	5.40051	0.285443	0.00378335	0.000158888	0	0.000639565	2.8296	96.5018	7.84828	8.89916	0.0379804	0.017826	1.30089	0.00387263	0.00073762	3.80731e-06	1.39338e-06	0.000252975	4.95711e-06	5.7667e-07	1.56055e-07	9.61366e-08	135.205
2015	Shandong	0	0	0	0	0	0	0	0	0	0	0	0	0	0	0	0	0	0	0	0	0	0	0	0	0	0	0	0	0	0	0	0
2015	Henan	1.55045	0.0626374	3.55415	17.4152	0.000508753	7.27741e-05	3.16054e-06	1.49113e-05	1875.08	848.803	44.8633	0.594632	0.0249725	963.919	0.100528	0	15167.3	1233.52	1398.69	5.96941	2.80172	204.462	0.608666	0.115932	0.000598399	0.000219483	0.0398009	0.0014554	0.00015459	4.54222e-05	0.0465847	21769.5
2015	Hubei	74.7863	3.02132	171.435	840.027	0.0245397	0.00351026	0.000152449	0.000719246	90444.9	40942.2	2163.99	28.6822	1.20456	46494.8	4.84865	21451.7	0	59499.1	67466	287.936	135.142	9862.28	29.3591	5.59202	0.0288639	0.0105634	1.91784	0.0375807	0.00437183	0.00118307	0.000728827	339909
2015	Hunan	0.00264487	0.000106885	0.0060648	0.0297067	8.68137e-07	1.24182e-07	5.39315e-09	2.54446e-08	3.27139	1.44952	0.0782347	0.00101789	4.35483e-05	1.64424	0.000171532	0.758616	25.8721	0	33764.9	2962.64	67.6348	0.376315	0.00147552	1.79451	0.296987	5.30674e-07	8.0665e-05	1.58081e-06	1.906e-07	4.96186e-08	2.62537e-08	36830.7
2015	Guangdong	0	0	0	0	0	0	0	0	0	0	0	0	0	0	0	0	0	0	0	0	3797.2	0	0	0	0	0	0	0	0	0	0	3797.2
2015	Guangxi	4.0976e-05	8.37338e-06	0.000475119	0.000175388	6.80102e-08	9.72845e-09	4.22501e-10	1.99334e-09	14.6111	0.336535	0.342201	0.000722076	0.000190481	0.00972217	1.39612e-05	0.00447978	0.152373	2082	50495.3	0	101.148	5.51562	0.0875292	359.144	59.444	3.14489e-05	0.00257091	5.04093e-05	7.20558e-06	1.55754e-06	9.61274e-08	53118.1
2015	Hainan	0	0	0	0	0	0	0	0	0	0	0	0	0	0	0	0	0	0	338.193	0	0	0	0	0	0	0	0	0	0	0	0	338.193
2015	Chongqing	0.640087	0.0970803	5.50849	4.16962	0.000788505	0.000112791	4.89845e-06	2.31106e-05	590.33	379.99	165.683	0.274025	0.0922254	230.94	0.161346	106.489	3627.43	7401.05	817.032	38.2926	1.6366	0	928.029	172.576	0.00383861	0.333437	27.2611	0.534522	0.0764027	0.0165157	0.00102111	14498.6
2015	Sichuan	188.693	57.4983	3262.54	4.56027	0.467012	0.0668033	0.00290123	0.0136879	99504.9	124009	108515	92.3526	60.4036	360.849	96.1607	123.321	1186.54	1344.01	197.994	7.0446	0.396603	53382.2	0	37.6388	0.00070618	233.464	19083.9	374.188	53.4885	11.5616	0.712538	412189
2015	Guizhou	0.0167301	0.00251661	0.142797	0.109865	2.04404e-05	2.92388e-06	1.26982e-07	5.99096e-07	15.6759	9.92736	4.29185	0.00716323	0.002389	6.08491	0.00418213	2.80585	95.5804	43569.5	280751	7836.85	562.375	8118.08	23.9851	0	0.785598	0.00861776	0.704571	0.0138149	0.00197465	0.000426854	2.63925e-05	340998
2015	Yunnan	0.225317	0.0684582	3.88443	0.013927	0.000556031	7.95369e-05	3.45424e-06	1.62969e-05	158341	3526.61	3679.48	7.74697	2.04813	0.899901	0.114488	0.363823	8.81479	51.6274	327559	2039.55	656.137	71.5261	773.296	515.122	0	0.277842	22.7114	0.445314	0.0636557	0.0137593	0.000847985	497261
2015	Tibet	0.215151	0.0655754	3.72085	0.0045672	0.000532616	7.61876e-05	3.30878e-06	1.56107e-05	49.9749	62.2617	54.4731	0.0463673	0.0303217	0.376471	2.22273	0.16851	0.801229	0.719695	0.119951	0.00375523	0.000240275	26.9393	326.178	0.0189723	3.7644e-07	0	21.7655	203.464	6988.09	6.28638	0.38744	7748.34
2015	Shaanxi	7138.32	2176.06	123473	135.022	17.6744	2.52822	0.109799	0.518026	4086.16	3910.96	2853.53	2.88121	1.58838	11577.7	3639.04	3707.92	12183.5	2699.98	1220.67	13.1434	2.44514	9825.01	16871.8	5.62057	0.00131755	16.1936	0	14139.3	1337.59	436.873	26.9243	221502
2015	Gansu	1405.56	428.473	24312.2	26.5935	3.48014	0.497813	0.0216198	0.102001	935.969	933.365	704.538	0.688911	0.392171	2280.08	25356.9	1243.92	2405.24	533.726	241.045	2.59881	0.482839	2004.53	4176.31	1.15607	0.000260515	1701.21	142220	0	224163	73237.8	4513.76	512835
2015	Qinghai	49.1891	14.9949	850.834	0.930788	0.121791	0.0174215	0.000756607	0.00356963	44.7196	47.5786	37.7089	0.0352165	0.0209901	79.8006	886.995	43.527	84.278	18.8315	8.45557	0.0917543	0.0169374	76.545	224.315	0.0449705	9.19783e-06	21613.4	4977.16	82916.7	0	2561.86	157.891	114696
2015	Ningxia	187.336	57.1078	3240.39	3.54359	0.463841	0.0663497	0.00288153	0.0135949	109.244	105.133	77.0675	0.0774719	0.0428985	303.847	506036	105.162	319.837	70.8894	32.0455	0.345097	0.0641906	258.914	455.832	0.148259	3.4594e-05	26.3752	18955.5	36554.5	3456.88	0	69.6076	570427
2015	Xinjiang	27.7199	8.35258	473.939	4.66365	0.0678412	0.00970428	0.000421452	0.00198839	464.627	220.243	24.3906	0.154974	0.0135767	273.855	493.445	361980	3657.78	304.059	337.686	1.47175	0.676423	87.684	81.4118	0.0500968	0.000147534	33.1039	2767.48	46125.8	4362	1425.14	0	423156
2015	Total inflow	393017	80568.1	1.29282e+06	63425.6	7045.51	556429	85809.4	89861.8	458119	408150	335394	2674.44	1090.55	64945.1	666577	395192	70869.8	121473	767678	13208.8	5334.27	84657.5	24418.9	1099.44	60.5636	23625	210544	180821	240409	80432.5	4770.3

## Sheet: Table S7
Table S7	Ni transfer embodied in the provincial electricity transmission for the years from 2015 to 2019 (kg)
2019		Beijing	Tianjin	Hebei	Shanxi	Inner Mongolia	Liaoning	Jilin	Heilongjiang	Shanghai	Jiangsu	Zhejiang	Anhui	Fujian	Jiangxi	Shandong	Henan	Hubei	Hunan	Guangdong	Guangxi	Hainan	Chongqing	Sichuan	Guizhou	Yunnan	Tibet	Shaanxi	Gansu	Qinghai	Ningxia	Xinjiang	Total outlow
2019	Beijing	0	249.581	3346.64	55.6856	1.94884	0.255194	0.0101006	0.0383114	0.294979	10.168	0.0312564	0.0181346	8.05166e-06	0.0426154	2.41317	0.0280921	0.693466	0.0226903	0.0512856	0.000228902	2.88717e-06	0.00709315	0.00286223	9.00976e-07	1.32459e-10	1.04386e-06	0.0836378	0.000233751	9.61532e-06	0.000713861	1.24924e-06	3668.02
2019	Tianjin	290164	0	16486	274.316	9.6003	1.25712	0.0497571	0.188727	1.45311	50.0891	0.153974	0.0893337	3.96637e-05	0.20993	11.8876	0.138386	3.41612	0.111776	0.252641	0.00112761	1.42226e-05	0.0349419	0.0140998	4.43834e-06	6.52512e-10	5.14219e-06	0.412012	0.00115149	4.73665e-05	0.00351659	6.15393e-06	307004
2019	Hebei	206130	585142	0	130555	4569.05	598.301	23.6808	89.8208	691.576	23838.8	73.2805	42.5164	0.0188771	99.9116	5657.66	65.8618	1625.83	53.1972	120.239	0.53666	0.00676896	16.6298	6.71047	0.00211233	3.10549e-07	0.00244732	196.088	0.548027	0.0225431	1.67364	0.00292883	959598
2019	Shanxi	787982	83248.9	1.08277e+06	0	3690.57	483.267	19.1278	72.5511	33285.4	1.1461e+06	3493.27	2044.06	0.899865	4820.71	251238	3166.28	78535.8	2564.31	5807.97	25.8696	0.326965	794.859	302.535	0.100404	1.497e-05	0.110058	8832.96	24.1511	0.993453	4.29883	0.129071	3.4993e+06
2019	Inner Mongolia	169122	331120	2.12318e+06	177000	0	1.34511e+06	53239.8	201937	6701.86	290681	2304.87	518.48	0.593734	401.167	1.05126e+06	810.216	2274.33	328.958	176.749	3.29575	0.00995024	422.838	1031.87	0.0801759	1.90715e-06	0.389403	30506.6	110.579	4.54867	3623.32	0.590971	5.79188e+06
2019	Liaoning	219131	3534.96	23238.3	112239	2486.86	0	100.987	48.8902	593.744	20458.2	62.6903	36.4871	0.016149	85.8576	144044	56.5208	1397.73	45.698	103.368	0.461011	0.00581922	14.2406	5.62547	0.00180514	2.66773e-07	0.00204978	164.333	0.455724	0.0187462	0.930508	0.00243553	527850
2019	Jilin	23040.2	5807.49	37291.2	13297.2	170265	408988	0	3390.44	165.778	6701.29	43.9427	11.9526	0.0113196	14.571	30706.4	18.6321	166.753	9.66624	12.4737	0.0971368	0.000702217	8.31454	17.6	0.00149388	5.62101e-08	0.00663507	520.15	1.8725	0.077025	60.0622	0.0100072	700539
2019	Heilongjiang	5058.53	4092.21	26247.6	3694.73	125488	73613.6	264343	0	89.9588	3829.49	29.0054	6.8305	0.00747178	6.07211	14806.3	10.6671	46.8674	4.6417	3.5705	0.0465474	0.000201005	5.35857	12.6789	0.00100383	2.69356e-08	0.00478373	374.818	1.35672	0.0558085	44.2639	0.00725072	521810
2019	Shanghai	0.000540538	6.98925e-05	0.000933772	1.55422e-05	8.97594e-07	1.17537e-07	4.65211e-09	1.76454e-08	0	152194	32765.4	272.099	8.44036	0.883655	0.000273914	0.55085	14.6262	0.464345	1.08197	0.00468574	6.09105e-05	0.20184	0.654187	4.43669e-05	2.7115e-09	0.000212035	0.0104201	2.89237e-05	1.18978e-06	3.59556e-06	1.54578e-07	185258
2019	Jiangsu	9.03867e-05	1.16871e-05	0.000156142	2.5989e-06	1.49924e-07	1.9632e-08	7.77037e-10	2.94728e-09	295638	0	39648.4	24354.2	10.2134	0.120584	4.58024e-05	0.0751752	1.99585	0.0633766	0.14845	0.000639572	8.35715e-06	0.0298689	0.109391	6.97394e-06	3.70101e-10	3.54558e-05	0.00174242	4.82277e-06	1.98384e-07	5.99527e-07	2.57744e-08	359654
2019	Zhejiang	0.00379727	0.000490992	0.00655972	0.000109183	6.26792e-06	8.20762e-07	3.24858e-08	1.23218e-07	301704	44658.3	0	241.331	2029.46	0.12454	0.00192413	0.0789527	2.05111	0.0680941	0.332506	0.000694644	1.87187e-05	0.549017	4.59567	0.00021209	4.01969e-10	0.00148955	0.0732012	0.000200111	8.23155e-06	2.48762e-05	1.06946e-06	348641
2019	Anhui	0.000599712	7.75435e-05	0.00103599	1.72435e-05	9.8995e-07	1.2963e-07	5.13078e-09	1.94609e-08	64310.3	795735	1.2357e+06	0	318.317	0.0264627	0.000303882	0.0167028	0.436398	0.0143213	0.0606309	0.000145694	3.41327e-06	0.087678	0.725805	3.36071e-05	8.43087e-11	0.000235248	0.0115609	3.16075e-05	1.30017e-06	3.92918e-06	1.6892e-07	2.09607e+06
2019	Fujian	0.000131628	1.70196e-05	0.000227384	3.78468e-06	2.1727e-07	2.84507e-08	1.12608e-09	4.2712e-09	10458.2	1548.03	273092	8.36543	0	0.00431703	6.66974e-05	0.0027368	0.0710991	0.00239082	355.36	0.0144256	0.0200053	0.0190311	0.159303	1.05663e-05	8.34765e-09	5.16333e-05	0.00253743	6.93663e-06	2.85338e-07	8.62305e-07	3.70715e-08	285463
2019	Jiangxi	1.59191e-05	2.0632e-06	2.75263e-05	4.60201e-07	1.74318e-07	2.28263e-08	9.03467e-10	3.42683e-09	43.0192	21.9198	0.701707	0.0391068	0.00018076	0	8.51135e-06	14.904	395.908	12.5574	29.2662	0.126717	0.00164757	3.41847	0.019179	0.000392427	7.33271e-08	6.22233e-06	0.00030683	1.29392e-05	5.32253e-07	1.60841e-06	6.91511e-08	521.883
2019	Shandong	2355.73	13927.4	1432.65	23.8382	0.834271	0.109245	0.00432392	0.0164005	0.126276	4.35277	0.0133804	0.00776315	3.44679e-06	0.018243	0	0.0120258	0.296863	0.00971336	0.0219546	9.79896e-05	1.23596e-06	0.00303647	0.00122528	3.85695e-07	5.67037e-11	4.46859e-07	0.0358041	0.000100065	4.11618e-06	0.000305593	5.3478e-07	17745.4
2019	Henan	0.0013207	0.00017117	0.00228366	3.81796e-05	1.44619e-05	1.89374e-06	7.49544e-08	2.843e-07	3569.01	1818.53	58.2157	3.24442	0.0149964	1984.21	0.000706127	0	32845.7	1041.8	2428.02	10.5128	0.136687	283.606	1.59115	0.0325569	6.08344e-06	0.000516223	0.0254556	0.00107347	4.41573e-05	0.000133439	5.73698e-06	44044.7
2019	Hubei	0.140395	0.018196	0.242762	0.00405864	0.00153736	0.000201312	7.96794e-06	3.02222e-05	379399	193317	6188.56	344.894	1.59417	210929	0.075064	131443	0	110748	258107	1117.55	14.5304	30148.5	169.146	3.46093	0.000646693	0.0548765	2.70602	0.114114	0.00469409	0.014185	0.000609863	1.32193e+06
2019	Hunan	0.0149989	0.00293482	0.0313178	0.000940815	0.0304466	0.00398688	0.000157801	0.000598535	509.604	259.661	8.42757	0.463779	0.00217094	283.315	0.0990311	176.558	4689.84	0	86733.7	25798.8	4.88275	40.7195	0.242057	5.7627	0.014929	0.00131508	0.279308	2.48734	0.102317	0.30919	0.0132932	118515
2019	Guangdong	2.09578e-08	3.03303e-09	3.79597e-08	7.68022e-10	9.91093e-09	1.2978e-09	5.13671e-11	1.94834e-10	0.000197391	9.36062e-05	5.64462e-06	1.67224e-07	1.45405e-09	9.75837e-05	4.03023e-08	6.08183e-05	0.0016153	0.837731	0	396.517	550.789	0.00340904	1.95497e-05	0.0885041	0.000229453	6.73793e-09	4.00819e-07	8.08354e-07	3.32516e-08	1.00483e-07	4.3201e-09	948.238
2019	Guangxi	0.000138898	2.01015e-05	0.000251579	5.09009e-06	6.5685e-05	8.60121e-06	3.40437e-07	1.29127e-06	1.30822	0.620378	0.0374099	0.00110828	9.63679e-06	0.646739	0.000267105	0.403075	10.7055	5552.09	147058	0	8.27877	22.5935	0.129567	586.564	1.5207	4.46558e-05	0.00265644	0.00535739	0.000220376	0.000665951	2.86316e-05	153243
2019	Hainan	2.12045e-12	3.06874e-13	3.84065e-12	7.77062e-14	1.00276e-12	1.31308e-13	5.19717e-15	1.97127e-14	1.99715e-08	9.4708e-09	5.71107e-10	1.69193e-11	1.47117e-13	9.87323e-09	4.07767e-12	6.15341e-09	1.63431e-07	8.47592e-05	989.898	0.0401185	0	3.44916e-07	1.97799e-09	8.95459e-06	2.32153e-08	6.81724e-13	4.05537e-11	8.17869e-11	3.3643e-12	1.01665e-11	4.37095e-13	989.938
2019	Chongqing	7.11746	0.920301	12.2953	0.20465	0.0118452	0.00155109	6.13922e-05	0.000232859	5536.28	3559.06	1156.85	6.37115	0.298004	2537.44	3.6068	1583.75	41984.1	8342.07	3397	83.8911	0.191237	0	8613.9	163.678	4.85453e-05	2.79194	137.206	0.382996	0.0157545	0.0476109	0.00204685	77129.5
2019	Sichuan	791.69	102.367	1367.63	22.7634	1.30664	0.171099	0.00677213	0.0256865	108732	137527	120436	247.749	31.0244	316.731	401.159	477.63	3058.63	730.215	263.027	7.4072	0.0148073	110801	0	43.7983	4.28632e-06	310.555	15261.7	41.708	1.71566	5.1848	0.222901	500980
2019	Guizhou	0.5495	0.0711243	0.94965	0.0158372	0.00314522	0.000411855	1.63012e-05	6.18302e-05	463.938	293.265	89.7532	0.524904	0.0231204	216.284	0.285166	134.974	3578.76	189857	1.11445e+06	8775.47	62.7389	118381	663.719	0	0.0050781	0.215215	10.5922	0.211898	0.00871641	0.0263402	0.00113245	1.43698e+06
2019	Yunnan	1.08151	0.13984	1.86829	0.0310965	0.00178506	0.000233747	9.25173e-06	3.50916e-05	59679.8	4369.67	1064.81	7.81486	0.274296	0.457913	0.548014	0.668203	4.59603	9.24584	556557	3897.86	31.3319	151.399	1308.9	0.937692	0	0.424241	20.8486	0.0569842	0.00234404	0.00708381	0.000304542	627110
2019	Tibet	392.484	50.7487	678.009	11.2851	0.647767	0.0848228	0.00335729	0.0127341	752.821	952.754	832.731	1.72057	0.214511	67.7002	198.877	181.126	37.7509	67.3586	5.11693	0.67424	0.000288063	834.834	6617.23	0.310024	3.90162e-07	0	7566.05	20.6767	0.850534	2.57035	0.110503	19274.8
2019	Shaanxi	263824	34112.8	455752	7585.72	435.423	57.0171	2.25674	8.55977	20803.8	26702.1	22277.2	50.9752	5.73861	44692	133683	121243	11877.5	42587.9	2295.84	425.849	0.129247	67320	171999	13.0005	0.000246426	62.6546	0	13898.7	571.721	1727.77	74.2788	1.44409e+06
2019	Gansu	14058.1	2762.64	29418.1	887.893	28900.4	3784.41	149.787	568.139	5735.13	3474.06	109285	500.516	28.1519	2335.55	93912.1	8075.97	1208.48	316488	10684.2	3164.19	0.601477	3937.69	12909.7	1.55632	0.00183102	1178.02	261673	0	97121.4	293490	12618.2	1.31835e+06
2019	Qinghai	1615.39	312.898	3355.65	99.6968	3181.83	416.649	16.491	62.55	761.698	551.692	12182.7	95.8108	3.13826	268.839	10373.3	1069.46	140.141	34854.5	1177.18	348.469	0.0662702	577.508	2562.61	0.224813	0.000201649	15113.7	30113.2	259936	0	32311.4	2425.2	413928
2019	Ningxia	5578.88	9856.1	59259.2	4836.35	279177	36557.3	1446.94	5488.21	40063.9	13885.7	1.03968e+06	50.5633	267.821	156.304	841849	432.191	105.999	2991.59	107.92	29.9097	0.00607547	234.36	623.666	0.0524351	1.73079e-05	10.8462	17336.6	21409.3	880.67	0	114.418	2.38243e+06
2019	Xinjiang	1234.77	242.652	2583.89	77.9866	2538.42	332.397	13.1563	49.9015	4060.52	38439.7	68434.6	315081	17.6287	480.447	8248.61	1.1632e+06	4663.47	27942.7	1275.32	279.379	0.0717951	385.214	1134.16	0.141216	0.000161669	103.47	22983.6	207378	8530.49	25778.2	0	1.90549e+06
2019	Total inflow	1.99049e+06	1.07456e+06	3.86642e+06	450661	620747	1.86995e+06	319356	211716	1.34375e+06	2.91098e+06	2.96891e+06	343928	2723.9	269699	2.58639e+06	1.43217e+06	188672	744233	2.19214e+06	44367	674.142	334385	207987	819.796	1.54412	16783.3	395701	502827	107113	357050	15233.1
2018		Beijing	Tianjin	Hebei	Shanxi	Inner Mongolia	Liaoning	Jilin	Heilongjiang	Shanghai	Jiangsu	Zhejiang	Anhui	Fujian	Jiangxi	Shandong	Henan	Hubei	Hunan	Guangdong	Guangxi	Hainan	Chongqing	Sichuan	Guizhou	Yunnan	Tibet	Shaanxi	Gansu	Qinghai	Ningxia	Xinjiang	Total outlow
2018	Beijing	0	247.886	5903.66	53.2993	3.27708	0.437983	0.0278749	0.0633312	0.219387	8.44003	0.0331932	0.0172766	9.35486e-06	0.041572	2.14082	0.0314494	0.657601	0.0283402	0.0550647	0.000115133	3.85001e-06	0.00579818	0.00276396	3.06262e-07	2.06862e-10	5.48289e-07	0.0730442	0.000480612	2.59371e-05	0.00167276	8.9133e-07	6220.4
2018	Tianjin	326010	0	8222.61	74.2353	4.56431	0.610023	0.0388241	0.0882077	0.305561	11.7553	0.0462315	0.0240629	1.30294e-05	0.0579014	2.98173	0.0438027	0.915906	0.0394722	0.0766941	0.000160357	5.36229e-06	0.0080757	0.00384965	4.26562e-07	2.88117e-10	7.63657e-07	0.101736	0.000669397	3.61252e-05	0.00232983	1.24144e-06	334329
2018	Hebei	472525	313413	0	67388.7	4143.35	553.762	35.2435	80.0724	277.38	10671.1	41.9676	21.8436	0.0118278	52.5613	2706.73	39.7629	831.434	35.8318	69.6207	0.145567	0.00486774	7.33089	3.4946	0.000387221	2.61544e-07	0.000693226	92.353	0.607659	0.0327935	2.11495	0.00112695	872993
2018	Shanxi	708283	44479.7	1.03613e+06	0	1882.87	251.647	16.0158	36.3875	25062.8	963007	3718.48	1971.25	1.04798	4748.9	225709	3566.24	75339	3232.5	6308.02	13.1345	0.441044	643.275	264.599	0.0336449	2.35991e-05	0.0508844	6976.64	43.6639	2.35641	4.58559	0.0809779	3.11169e+06
2018	Inner Mongolia	256164	305812	2.16113e+06	141206	0	1.27614e+06	81218.2	184526	2442.23	124172	2246.81	254.541	0.63322	470.1	505384	1028.11	1842.16	445.438	168.053	1.74788	0.0117499	552.526	1337.11	0.0376926	3.14046e-06	0.306205	35744.5	292.406	15.7802	4781.33	0.542287	5.08737e+06
2018	Liaoning	220637	75264	5183.22	79.7173	2585.67	0	348.269	49.9978	0.831589	40.1666	0.633689	0.0823187	0.000178593	0.159559	228567	0.302633	1.01059	0.14258	0.0883555	0.000562537	6.17764e-06	0.153992	0.363883	1.04356e-05	1.01073e-09	8.32652e-05	9.72693	0.0794794	0.00428924	1.2948	0.0001474	532770
2018	Jilin	23455.2	10862.9	28787.3	1857.34	125338	385973	0	2563.94	32.0739	1630.56	29.4955	3.3425	0.00831273	6.17379	27442.9	13.4979	24.2281	5.84913	2.20988	0.022952	0.000154511	7.25324	17.5519	0.0004948	4.12384e-08	0.00401949	469.212	3.83835	0.207143	62.763	0.00711849	608589
2018	Heilongjiang	4758.92	3167.21	15344	999.097	67521.3	63186.5	240457	0	17.2726	878.173	15.8888	1.80018	0.00447794	3.32476	6626.36	7.27063	13.0337	3.15023	1.18897	0.0123614	8.31301e-05	3.90727	9.45543	0.000266548	2.221e-08	0.00216535	252.77	2.06776	0.11159	33.8114	0.00383481	403304
2018	Shanghai	0.000488403	0.000323332	0.00770028	7.83784e-05	4.54451e-06	6.07377e-07	3.86557e-08	8.78251e-08	0	158225	42009.6	332.252	11.8396	0.260631	1.22049e-05	0.189504	4.18652	0.178372	0.351052	0.000725147	2.45448e-05	0.283518	2.13727	3.37599e-05	1.30289e-09	0.000170095	0.0599264	0.000375354	2.05651e-05	3.15487e-05	6.96369e-07	200586
2018	Jiangsu	6.56983e-05	4.35149e-05	0.00103633	1.02407e-05	6.11539e-07	8.17326e-08	5.20177e-09	1.18183e-08	220673	0	50195.8	28244.9	14.1467	0.0260418	1.6309e-06	0.0189749	0.417977	0.0179001	0.0356624	7.28129e-05	2.49345e-06	0.0371206	0.287654	4.49285e-06	1.30825e-10	2.2893e-05	0.00806548	5.0504e-05	2.76705e-06	4.24489e-06	9.36966e-08	299129
2018	Zhejiang	0.00303472	0.00201278	0.0479355	0.000434111	2.82773e-05	3.77928e-06	2.40527e-07	5.46473e-07	307469	48662.5	0	1727.48	2269.06	0.042455	7.3937e-05	0.0378665	0.623745	0.042614	0.159657	0.000180635	1.11629e-05	1.58374	13.3074	0.000201301	3.24552e-10	0.00105907	0.373123	0.00233449	0.000127905	0.000196216	4.33102e-06	360144
2018	Anhui	0.000399929	0.000265251	0.00631708	5.72575e-05	3.72647e-06	4.98046e-07	3.16975e-08	7.20161e-08	52774.6	796481	1.05391e+06	0	297.025	0.00703348	9.74549e-06	0.00602981	0.105361	0.00658803	0.0228845	2.77504e-05	1.60004e-06	0.208875	1.75368	2.65361e-05	4.98599e-11	0.000139567	0.0491712	0.000307648	1.68558e-05	2.58581e-05	5.70758e-07	1.90347e+06
2018	Fujian	9.33319e-05	6.19026e-05	0.00147424	1.3351e-05	8.6966e-07	1.16231e-07	7.39735e-09	1.68066e-08	9456.12	1496.6	247611	53.1282	0	0.00130569	2.27391e-06	0.00116457	0.0191831	0.00133367	188.719	0.0167375	0.0131949	0.0487077	0.409265	1.01651e-05	3.00726e-08	3.25714e-05	0.0114753	7.17966e-05	3.9337e-06	6.03458e-06	1.33199e-07	258806
2018	Jiangxi	9.53055e-05	8.45613e-06	0.000198386	0.000786815	3.07672e-07	4.11206e-08	2.61707e-09	5.94593e-09	47.7214	17.4072	0.955389	0.0358116	0.000269258	0	3.00719e-05	16.6588	371.13	15.5785	31.0611	0.0633581	0.00217173	2.65026	0.0178753	0.000130127	1.13837e-07	1.44855e-06	0.000506667	4.10666e-05	2.21879e-06	3.43231e-06	7.61631e-08	503.284
2018	Shandong	2043.08	3211.27	25737.2	232.361	14.2865	1.90941	0.121522	0.276095	0.956425	36.7946	0.144707	0.0753182	4.07829e-05	0.181235	0	0.137105	2.86684	0.12355	0.240057	0.000501925	1.67843e-05	0.0252774	0.0120496	1.33516e-06	9.01822e-10	2.39029e-06	0.318439	0.00209525	0.000113074	0.00729249	3.88579e-06	31282.4
2018	Henan	0.0143415	0.0031774	0.0753243	0.0915003	6.64782e-05	8.88485e-06	5.65465e-07	1.28473e-06	5520.94	2013.86	110.532	4.14309	0.0311513	2666.88	0.0035594	0	42936.4	1802.3	3593.5	7.32998	0.25125	306.618	2.08326	0.0150549	1.317e-05	0.000170539	0.466281	0.0073012	0.000394318	0.000610136	1.35408e-05	58965.6
2018	Hubei	0.738038	0.0654835	1.53628	6.09303	0.00238259	0.000318434	2.02664e-05	4.60448e-05	369550	134800	7398.46	277.322	2.08511	178511	0.232874	129004	0	120639	240535	490.64	16.8177	20523.4	138.425	1.00769	0.000881545	0.0112174	3.92359	0.318017	0.0171821	0.0265795	0.0005898	1.2019e+06
2018	Hunan	0.00545601	0.00358625	0.0825189	0.00243754	0.00450106	0.00060157	3.82861e-05	8.69853e-05	99.4491	36.2772	2.17201	0.0748274	0.000612139	48.0394	0.150973	34.7301	773.326	0	97100.5	10031.7	6.78907	5.61053	0.0637389	2.38293	0.0180241	0.00429366	0.630375	6.27156	0.338451	0.523906	0.0116311	108149
2018	Guangdong	1.35978e-08	8.97658e-09	2.12405e-07	3.11199e-09	2.24529e-09	3.00084e-10	1.90985e-11	4.33913e-11	0.000221087	4.4041e-05	1.02914e-05	9.22728e-08	2.90042e-09	3.42919e-05	7.21639e-08	2.4814e-05	0.000551831	1.22674	0	889.105	701.135	0.0069511	4.80707e-05	0.211178	0.00159748	5.86763e-09	1.64713e-06	2.9945e-06	1.61608e-07	2.50155e-07	5.55352e-09	1591.69
2018	Guangxi	3.07602e-05	2.03063e-05	0.000480489	7.03976e-06	5.07915e-06	6.78832e-07	4.32034e-08	9.81573e-08	0.500129	0.099627	0.0232805	0.000208734	6.56116e-06	0.077573	0.000163245	0.0561328	1.24832	2775.05	138367	0	9.67433	15.7244	0.108743	477.714	3.61372	1.32734e-05	0.00372605	0.00677398	0.000365581	0.000565887	1.25628e-05	141651
2018	Hainan	2.32456e-12	1.53455e-12	3.63108e-11	5.31998e-13	3.83834e-13	5.12996e-14	3.2649e-15	7.41779e-15	3.7795e-08	7.52886e-09	1.75932e-09	1.57741e-11	4.9583e-13	5.86223e-09	1.23365e-11	4.24198e-09	9.4336e-08	0.000209712	1714.29	0.151993	0	1.1883e-06	8.21773e-09	3.6101e-05	2.7309e-07	1.00308e-12	2.81579e-10	5.11913e-10	2.76271e-11	4.27643e-11	9.49379e-13	1714.44
2018	Chongqing	2.34399	1.5488	36.885	0.418082	0.0218001	0.0029136	0.000185433	0.000421299	6415.31	3555.05	1391.22	7.55566	0.392087	2500.6	0.0607958	1812.63	40213.3	13945	3849.22	54.8209	0.269129	0	10235.6	66.079	9.8498e-05	0.814621	286.996	1.82947	0.100208	0.153752	0.00339407	84378.1
2018	Sichuan	184.456	122.346	2913.74	26.3126	1.7188	0.229719	0.0146202	0.0332168	98703.1	132036	101789	290.757	28.6872	386.73	4.4914	716.252	2592.87	1107.64	258.695	4.37455	0.0180874	96015.5	0	12.2236	7.85986e-06	64.3753	22680.2	141.898	7.77452	11.9267	0.263254	460102
2018	Guizhou	0.145321	0.0960197	2.28656	0.0260091	0.00162257	0.000216857	1.38016e-05	3.1357e-05	402.879	222.108	86.1864	0.471915	0.02429	157.601	0.0129548	114.236	2534.5	157769	958761	10680.1	67.0347	94113.8	633.129	0	0.0191893	0.0506502	17.7907	0.495099	0.02681	0.0414161	0.00091827	1.22556e+06
2018	Yunnan	0.109415	0.0725729	1.72836	0.015609	0.0010196	0.00013627	8.67274e-06	1.97043e-05	53401.5	3894.71	1073.65	8.18642	0.302586	0.257909	0.00266576	0.445467	1.99704	26.9123	485856	2936.48	33.9701	70.2111	479.812	403.221	0	0.0381859	13.4534	0.0842344	0.0046151	0.00707996	0.000156274	548203
2018	Tibet	34.8635	23.1347	550.6	4.9784	0.889608	0.118897	0.00756703	0.0171921	159.724	211.943	185.602	0.473456	0.0523084	43.6056	19.9783	114.038	15.6446	46.9992	3.06187	0.183183	0.00021408	198.434	1289.44	0.0214946	3.2913e-07	0	4284.57	43.7014	107.642	68.6768	0.165641	7408.56
2018	Shaanxi	37596.5	24937.1	593890	5362.04	350.205	46.8052	2.97886	6.7679	22752.6	29661.6	22613.4	65.9946	6.37313	46810.8	911.08	122854	13065.9	46982.3	2843.93	183.04	0.198842	69848.6	172910	4.79462	0.000328872	33.5149	0	28917.9	1560.61	2415.89	53.6304	1.24669e+06
2018	Gansu	2038.59	1383.76	31836.8	309.45	1745.1	233.234	14.8439	33.725	3961.01	2169.89	70248.6	79.9446	19.7982	2477.34	58517.7	7030.96	791.783	322967	12228.9	1257.5	0.85502	3798.53	10062.5	0.563623	0.00225938	1663.74	244022	0	131237	203149	4510.04	1.11779e+06
2018	Qinghai	147.113	99.7167	2299.11	22.2479	118.245	15.8035	1.00579	2.28514	310.454	204.719	4801.91	18.7912	1.35332	179.139	3962.43	622.887	58.2655	21852.4	827.812	85.084	0.057879	309.565	1022.87	0.0438219	0.000152873	15492.9	17639.2	164460	0	13755.7	1280.27	249591
2018	Ningxia	966.791	1090.76	10069.6	404.007	24568.5	3283.59	208.98	474.798	37580.5	6407.85	980825	212.486	276.426	247.633	831923	658.438	75.4641	5751.39	222.831	22.394	0.0155799	371.045	930.902	0.030681	4.02358e-05	28.7147	24415.2	41883.6	2260.29	0	77.6762	1.97524e+06
2018	Xinjiang	195.956	133.01	3060.25	29.7546	167.744	22.419	1.42683	3.24173	1826.38	13575.4	24174.1	104091	6.81299	515.315	5624.88	920286	4538.78	31231.8	1548.97	121.636	0.108301	396.996	967.481	0.0557421	0.000218546	159.923	23456	233756	12614.9	19527.2	0	1.40203e+06
2018	Total inflow	2.05504e+06	784249	3.9311e+06	218056	228445	1.72971e+06	322305	187778	1.21894e+06	2.43413e+06	2.61448e+06	137668	2936.12	239827	1.89741e+06	1.18792e+06	186031	730637	1.95448e+06	26779.7	837.669	287193	200323	968.437	3.65656	17444.4	380366	469555	147808	243815	5922.7
2017		Beijing	Tianjin	Hebei	Shanxi	Inner Mongolia	Liaoning	Jilin	Heilongjiang	Shanghai	Jiangsu	Zhejiang	Anhui	Fujian	Jiangxi	Shandong	Henan	Hubei	Hunan	Guangdong	Guangxi	Hainan	Chongqing	Sichuan	Guizhou	Yunnan	Tibet	Shaanxi	Gansu	Qinghai	Ningxia	Xinjiang	Total outlow
2017	Beijing	0	217.236	4265.12	33.768	2.5309	0.350566	0.0139162	0.0574905	0.0699991	4.26926	0.0191152	0.00654174	1.14616e-05	0.00213883	1.12054	0.487368	0.028543	0.00222555	0.00270402	1.40692e-05	1.8246e-07	0.00107405	0.000896357	2.02842e-08	6.44678e-10	1.15261e-06	0.0444914	0.00103248	9.89929e-05	0.00165022	4.12735e-06	4525.14
2017	Tianjin	143047	0	683.918	5.41475	0.405834	0.0562138	0.00223148	0.00921868	0.0112245	0.684581	0.00306514	0.00104898	1.83788e-06	0.000342965	0.179681	0.0781502	0.0045769	0.00035687	0.000433593	2.25602e-06	2.92577e-08	0.000172225	0.000143732	3.2526e-09	1.03375e-10	1.84822e-07	0.00713426	0.000165559	1.58736e-05	0.000264614	6.61826e-07	143738
2017	Hebei	436281	348425	0	54160.5	4059.31	562.272	22.3202	92.2088	112.271	6847.45	30.6588	10.4923	0.0183832	3.43047	1797.24	781.689	45.78	3.56956	4.33697	0.0225656	0.000292647	1.72266	1.43767	3.25338e-05	1.034e-06	0.00184866	71.3596	1.65599	0.158774	2.64678	0.00661985	853319
2017	Shanxi	598218	49233.5	955206	0	1302.54	180.42	7.16201	29.5877	11501	701913	3083.98	1075.53	1.84918	331.969	181188	80076.1	4688.32	345.142	443.29	2.1836	0.029912	151.9	109.89	0.0026755	0.000100057	0.138065	5445.74	123.592	11.8498	7.82354	0.49406	2.59468e+06
2017	Inner Mongolia	290062	298426	2.22338e+06	135403	0	1.17594e+06	46680.4	192846	438.582	17266.1	1278.51	26.6362	0.766603	410.912	66713.1	3046.91	206.621	433.434	37.1085	2.70478	0.00250398	508.965	769.81	0.0135623	0.000123938	1.05612	38388.5	947.756	90.8696	5392.9	3.78867	4.49869e+06
2017	Liaoning	387416	1982.26	3447.59	54.5464	1965.66	0	576.394	45.103	0.149598	6.9303	0.308906	0.0106607	0.000185222	0.0965278	144811	1.04002	0.0674279	0.101798	0.010444	0.000635377	7.04732e-07	0.118478	0.178698	3.15135e-06	2.91141e-08	0.000245106	8.91107	0.219956	0.0210891	1.24868	0.000879277	540317
2017	Jilin	40113.7	718.359	4194.47	239.552	14871	387691	0	1529.08	0.77316	30.5442	2.24083	0.047117	0.00134362	0.71992	14921.9	5.37136	0.363933	0.759378	0.0651908	0.00473879	4.3989e-06	0.891598	1.34849	2.37578e-05	2.1714e-07	0.00185002	67.246	1.6602	0.159178	9.44654	0.00663668	464401
2017	Heilongjiang	6709.95	332.333	2288.42	136.79	8552.47	63672.8	241470	0	0.442624	17.4425	1.28819	0.0269078	0.000772405	0.413976	2466.23	3.075	0.208475	0.436666	0.0374138	0.00272495	2.52458e-06	0.512742	0.775515	1.36629e-05	1.24862e-07	0.00106394	38.673	0.954779	0.0915429	5.43282	0.00381674	325699
2017	Shanghai	0.000404113	0.000322302	0.00632793	5.56972e-05	3.75571e-06	5.20219e-07	2.06508e-08	8.53123e-08	0	124184	47362.3	197.281	28.3987	0.137847	0.00365003	0.105868	2.33771	0.146059	0.223111	0.0009267	1.50549e-05	0.25732	1.98865	3.25423e-05	4.24631e-08	7.31317e-05	0.0505636	0.00131694	0.000134177	0.0118185	5.27018e-06	171777
2017	Jiangsu	3.96256e-05	3.16058e-05	0.000620533	5.4332e-06	3.6829e-07	5.10135e-08	2.02505e-09	8.36586e-09	210338	0	58783	20717.1	35.2467	0.0128094	0.00450511	0.00984299	0.217189	0.0135933	0.0243556	8.65046e-05	1.64345e-06	0.0246808	0.191833	3.13797e-06	3.9638e-09	7.26557e-06	0.00494608	0.00032149	3.15865e-05	0.0145939	1.28571e-06	289874
2017	Zhejiang	0.000338709	0.000270449	0.00530988	4.27137e-05	3.15095e-06	4.36451e-07	1.73255e-08	7.1575e-08	255305	25846	0	1183.05	4588.17	0.0161	0.586183	0.013097	0.266884	0.019976	0.535463	0.000163165	3.61316e-05	0.138207	1.22173	1.98254e-05	7.47653e-09	7.45953e-05	0.0406972	0.0281504	0.00270379	1.89896	0.000112535	286927
2017	Anhui	4.09463e-05	3.26927e-05	0.000641873	5.18599e-06	3.80899e-07	5.27599e-08	2.09437e-09	8.65226e-09	40119.5	696404	882144	0	528.939	0.00250668	0.0675771	0.00200953	0.0418012	0.00299219	0.0627681	2.31825e-05	4.23542e-06	0.0171444	0.150203	2.43866e-06	1.06227e-09	8.94283e-06	0.00492934	0.00325066	0.000312256	0.218918	1.2995e-05	1.6192e+06
2017	Fujian	5.01186e-06	4.00183e-06	7.857e-05	6.32032e-07	4.66244e-08	6.45815e-09	2.56365e-10	1.05909e-09	3777.74	382.442	113226	17.5055	0	0.000238232	0.00867372	0.000193797	0.00394909	0.00036006	367.494	0.0264855	0.0247975	0.00204541	0.0180779	1.11885e-05	1.21361e-06	1.10378e-06	0.000602195	0.00041654	4.00079e-05	0.0280988	1.66518e-06	117771
2017	Jiangxi	0.000223653	3.5146e-05	0.000686216	0.00186169	6.53519e-07	9.05217e-08	3.59338e-09	1.48449e-08	95.1804	48.7294	2.18567	0.0749615	0.00131054	0	6.55253e-05	34.9471	782.332	47.7304	73.5567	0.302857	0.0049634	13.3829	0.114964	0.000126454	1.38775e-05	4.43049e-06	0.0029307	0.000262987	2.56715e-05	1.54451e-05	1.05162e-06	1098.55
2017	Shandong	340.642	272.045	5341.21	42.2877	3.16945	0.439014	0.0174273	0.0719953	0.0876599	5.34639	0.0239379	0.00819222	1.43533e-05	0.00267846	0	0.610331	0.0357444	0.00278706	0.00338624	1.76189e-05	2.28494e-07	0.00134503	0.00112251	2.54019e-08	8.0733e-10	1.44341e-06	0.0557166	0.00129297	0.000123969	0.00206657	5.16868e-06	6006.07
2017	Henan	0.0153513	0.00241238	0.047101	0.127784	4.48567e-05	6.2133e-06	2.46645e-07	1.01894e-06	6533.07	3344.72	150.022	5.14526	0.0899539	3154.33	0.00449757	0	53698.3	3276.15	5048.84	20.7877	0.340682	918.583	7.89098	0.00867966	0.000952532	0.000304103	0.20116	0.0180511	0.00176206	0.00106013	7.2182e-05	76158.7
2017	Hubei	0.640873	0.10071	1.96633	5.33462	0.00187264	0.000259388	1.02967e-05	4.25378e-05	272737	139633	6262.98	214.8	3.75532	131684	0.187761	100140	0	136770	210775	867.83	14.2225	38348.3	329.426	0.362351	0.0397656	0.0126955	8.39786	0.753582	0.0735611	0.0442576	0.0030134	1.0378e+06
2017	Hunan	0.00329172	0.00257744	0.050603	0.00106573	3.01158e-05	4.17147e-06	1.65592e-07	6.84093e-07	34.1469	17.4558	0.88268	0.0268676	0.000529261	16.4601	0.14923	12.5302	280.14	0	86978.4	12911.2	5.86906	4.97314	0.0580389	5.31165	0.591615	0.00925662	0.403134	8.52914	0.817735	0.483324	0.0340954	100279
2017	Guangdong	2.69092e-08	2.13982e-08	4.2012e-07	4.51908e-09	2.49455e-10	3.45531e-11	1.37163e-12	5.66648e-12	0.00320464	0.000224162	8.76195e-05	3.56424e-07	5.25372e-08	2.94841e-05	1.21989e-07	2.24943e-05	0.000501335	1.67372	0	687.46	643.691	0.00932335	0.000119368	0.28282	0.0315007	1.18612e-08	3.35621e-06	6.96493e-06	6.68241e-07	3.94706e-07	2.78427e-08	1333.15
2017	Guangxi	5.28887e-05	4.2057e-05	0.000825724	8.88202e-06	4.90292e-07	6.79124e-08	2.69587e-09	1.11372e-08	6.29855	0.440579	0.172212	0.000700534	0.000103259	0.0579496	0.000239764	0.0442114	0.985349	3289.6	92210.4	0	6.2221	18.3246	0.234611	555.868	61.913	2.33126e-05	0.00659646	0.0136892	0.00131339	0.000775774	5.47235e-05	96150.6
2017	Hainan	4.20789e-12	3.34611e-12	6.56957e-11	7.06666e-13	3.90083e-14	5.4032e-15	2.14487e-16	8.86088e-16	5.01121e-07	3.5053e-08	1.37014e-08	5.57354e-11	8.21544e-12	4.61055e-09	1.90759e-11	3.51752e-09	7.83956e-08	0.000261725	1491.71	0.107501	0	1.45793e-06	1.8666e-08	4.42256e-05	4.92588e-06	1.85478e-12	5.24823e-10	1.08913e-09	1.04495e-10	6.17216e-11	4.35387e-12	1491.82
2017	Chongqing	2.22202	1.76766	34.7053	0.364055	0.0206058	0.0028542	0.000113301	0.000468069	6145.41	4300.27	2002.62	6.88564	1.20079	2206.42	0.123673	1683.6	37512.4	19157.8	4235.66	119.738	0.285811	0	10918.6	0.225839	0.0054866	0.400597	277.293	6.37355	0.654524	0.361682	0.0255096	88615.5
2017	Sichuan	121.589	97.1025	1906.47	15.1139	1.13129	0.1567	0.00622041	0.0256977	87202.4	108099	104359	181.162	62.5741	273.804	6.5609	522.174	1966.25	1153.45	231.707	7.22948	0.0156349	65623.1	0	9.70743	0.000331268	22.0113	15239.2	345.944	35.5559	19.6303	1.38463	387503
2017	Guizhou	0.152161	0.121044	2.37652	0.0249704	0.00141103	0.000195448	7.75856e-06	3.20521e-05	422.776	295.328	136.978	0.4728	0.0821331	152.104	0.0198836	116.059	2586.01	159842	936546	7065.2	63.1955	86958.2	746.461	0	0.32374	0.0280959	18.9881	1.08892	0.107372	0.0617412	0.00435512	1.19495e+06
2017	Yunnan	0.123399	0.0985475	1.93484	0.0153405	0.00114813	0.000159032	6.31298e-06	2.60801e-05	48445.6	2761.95	1117.43	4.39725	0.670016	0.319852	0.00673936	0.561864	2.71006	46.7701	393851	1871.89	26.576	88.9339	608.995	678.713	0	0.0223391	15.466	0.351284	0.0361033	0.0201841	0.001406	449524
2017	Tibet	0.300646	0.2401	4.71401	0.037368	0.00279728	0.000387463	1.53809e-05	6.35413e-05	152.261	188.646	184.751	0.316542	0.110778	0.594717	4.12608	1.82972	3.4629	14.944	0.950414	0.0932695	6.41313e-05	114.635	1047.12	0.0169727	4.27378e-06	0	37.669	235.807	4692.96	13.3626	4.29715	6703.25
2017	Shaanxi	29834.3	23826.2	467792	3707.4	277.586	38.4497	1.52631	6.30548	12002.5	14524.7	14019	24.3412	8.40588	39373.1	1607.33	106978	9022.83	41134.9	2553.53	256.626	0.172305	49385.7	74976.7	1.31812	0.0117591	94.7744	0	84854.4	8135.75	4808.65	339.207	989586
2017	Gansu	849.142	678.139	13314.3	105.52	7.90064	1.09435	0.0434417	0.179466	1441.68	813.062	26023.8	5.13414	15.604	1121.2	39455.2	4304.29	287.197	124003	5235.06	773.426	0.353247	1594.04	3869.23	0.380761	0.0354398	2447.32	106310	0	216234	127805	9015.85	685711
2017	Qinghai	24.8755	19.8659	390.039	3.09118	0.231448	0.0320588	0.00127262	0.00525743	95.4356	89.7764	823.781	0.260604	0.493945	32.9663	1152.39	257.669	10.4707	3622.57	153.127	22.5945	0.0103326	86.6233	479.237	0.0170457	0.00103532	14874.8	3114.33	65873.6	0	3732.88	1202.83	96064
2017	Ningxia	132.761	106.025	2081.65	16.4952	1.23525	0.171099	0.00679201	0.0280591	18357.3	1913.98	548768	84.936	329.045	148.455	853950	425.537	34.574	2317.62	100.552	14.4555	0.00678499	189.52	313.314	0.011014	0.000662379	43.3962	14095.7	39984.3	3833.51	0	159.838	1.4874e+06
2017	Xinjiang	65.6278	52.4102	1029	8.17117	0.610606	0.0845776	0.00335742	0.0138701	934.889	484.427	2030.16	1.04533	1.21729	484.243	3049.29	1.00999e+06	6790.66	9996.51	1040.98	62.3944	0.0702423	238.979	300.028	0.0305211	0.00285902	189.141	8216.15	174306	16711.6	9877.43	0	1.24586e+06
2017	Total inflow	1.93322e+06	724389	3.68536e+06	193938	31045.8	1.62808e+06	288758	194548	976200	1.84942e+06	1.81179e+06	23756.7	5606.65	179396	1.31112e+06	1.30838e+06	117923	505458	1.74138e+06	24686.3	761.094	244248	94484.5	1252.27	62.9584	17673.1	191354	366693	249748	151680	10727.8
2016		Beijing	Tianjin	Hebei	Shanxi	Inner Mongolia	Liaoning	Jilin	Heilongjiang	Shanghai	Jiangsu	Zhejiang	Anhui	Fujian	Jiangxi	Shandong	Henan	Hubei	Hunan	Guangdong	Guangxi	Hainan	Chongqing	Sichuan	Guizhou	Yunnan	Tibet	Shaanxi	Gansu	Qinghai	Ningxia	Xinjiang	Total outlow
2016	Beijing	0	190.615	9593.85	11.0823	1.67408	0.231411	0.00881885	0.0400603	0.0413089	0.986647	0.00565028	0.00209472	9.36061e-06	0.0114048	324.809	0.0504025	0.197454	0.013421	0.0187438	6.91358e-05	2.19429e-06	0.00398842	0.000288331	5.82707e-08	6.53325e-09	4.26446e-07	0.0177166	0.000437817	4.40346e-05	0.0012288	1.47254e-06	10123.7
2016	Tianjin	93801.2	0	5906.41	6.82274	1.03064	0.142467	0.00542928	0.024663	0.0254316	0.607425	0.00347857	0.00128961	5.76282e-06	0.00702128	199.967	0.0310301	0.121562	0.00826257	0.0115395	4.25632e-05	1.3509e-06	0.00245545	0.00017751	3.58741e-08	4.02217e-09	2.6254e-07	0.0109071	0.00026954	2.71097e-05	0.000756502	9.06565e-07	99916.5
2016	Hebei	424842	124334	0	7228.72	1091.97	150.944	5.75234	26.1305	26.9449	643.568	3.68555	1.36634	0.00610572	7.43907	211866	32.8765	128.795	8.75421	12.2262	0.0450958	0.00143129	2.60156	0.188072	3.80087e-05	4.2615e-06	0.000278162	11.5561	0.285578	0.0287228	0.801517	0.000960508	770426
2016	Shanxi	637813	19305.4	971664	0	169.551	23.4373	0.893172	4.05731	19045	455264	2553.43	966.539	4.23018	5206.35	32898.6	23229	91055.7	6181.05	8643.23	31.8406	1.01184	1794.22	82.5492	0.0268045	0.0030089	0.106356	4594.43	108.878	10.9508	6.15431	0.366198	2.28066e+06
2016	Inner Mongolia	235819	57889.6	2.04914e+06	138202	0	1.05161e+06	40075.9	182048	676.434	12426.7	599.145	26.5598	0.992582	694.649	112446	909.936	3024.39	284.219	291.475	1.46411	0.0341222	503.493	499.652	0.00155054	0.000138356	0.893573	35395.2	920.477	92.5791	5524.83	3.09591	3.92911e+06
2016	Liaoning	288805	60877.1	21090.6	4186.38	825.883	0	366.341	19.8883	15.6088	372.714	2.14791	0.791303	0.00355836	4.32229	145900	19.047	74.6038	5.07283	7.08205	0.0261318	0.000829077	1.51822	0.12157	2.20331e-05	2.46942e-06	0.000183746	7.58962	0.188724	0.0189814	0.604698	0.000634751	522583
2016	Jilin	27969	5907.23	4938.37	597.518	10921.3	355644	0	736.769	2.45749	53.3717	1.05941	0.113565	0.00175508	1.40356	14120	3.11925	11.4484	0.890434	1.09302	0.00458692	0.000127957	0.862836	0.72373	4.31794e-06	4.33459e-07	0.00129109	51.1711	1.32991	0.133759	7.93179	0.004473	420971
2016	Heilongjiang	4929.48	1049.11	2849	236.56	9332.25	60762.6	231090	0	1.07941	21.211	0.76844	0.0452495	0.00127305	0.920367	2482.11	1.42069	4.9035	0.429667	0.470841	0.00221336	5.51202e-05	0.641152	0.614005	2.25338e-06	2.0916e-07	0.00109754	43.4796	1.13058	0.113711	6.7774	0.00380256	312815
2016	Shanghai	0.00126609	0.000260831	0.0131279	0.00336649	2.29075e-06	3.16655e-07	1.20674e-08	5.48172e-08	0	33217.9	55284.5	89.0035	91.5879	0.136417	0.000485022	0.0712234	2.39319	0.169722	0.238642	0.000874299	2.79372e-05	0.514383	5.32317	1.08735e-06	8.26202e-08	0.000151933	0.0923907	0.0022197	0.000244089	0.000122983	7.46569e-06	88692
2016	Jiangsu	0.000117203	2.41454e-05	0.00121526	0.00031164	2.12057e-07	2.9313e-08	1.11709e-09	5.07448e-09	208697	0	64993.6	27918.7	107.673	0.0126283	4.4899e-05	0.00659322	0.22154	0.0157114	0.0340798	8.09348e-05	3.98964e-06	0.0476169	0.492771	1.00657e-07	7.64824e-09	1.40646e-05	0.0085527	0.00020548	2.25956e-05	1.13846e-05	6.91107e-07	301718
2016	Zhejiang	9.23854e-05	1.90326e-05	0.000957932	0.00024565	1.67155e-07	2.3106e-08	8.80549e-10	3.99997e-09	164506	11939.9	0	2356.38	11513.4	0.00995426	3.53917e-05	0.00519711	0.174629	0.0123845	1.40811	6.37969e-05	0.000164843	0.0375341	0.388428	7.93431e-08	6.02873e-09	1.10865e-05	0.00674167	0.00016197	1.7811e-05	8.97395e-06	5.44766e-07	190317
2016	Anhui	1.48054e-05	3.05012e-06	0.000153516	3.93673e-05	2.67878e-08	3.70292e-09	1.41115e-10	6.41025e-10	26363.3	541348	754375	0	1249.75	0.00159524	5.67178e-06	0.000832877	0.0279857	0.00198471	0.153705	1.02239e-05	1.79938e-05	0.00601512	0.0622484	1.27153e-08	9.6615e-10	1.77669e-06	0.0010804	2.59569e-05	2.85435e-06	1.43814e-06	8.73028e-08	1.32334e+06
2016	Fujian	7.25154e-07	1.49391e-07	7.51903e-06	1.92817e-06	1.31203e-09	1.81365e-10	6.91163e-12	3.13967e-11	1291.24	93.7187	54550.1	18.4958	0	7.81333e-05	2.77797e-07	4.07934e-05	0.00137071	9.72087e-05	316.629	5.00757e-07	0.0370669	0.000294614	0.00304886	6.22782e-10	4.73209e-11	8.70202e-08	5.2917e-05	1.27134e-06	1.39803e-07	7.04386e-08	4.27599e-09	56270.2
2016	Jiangxi	0.429197	0.0130111	0.654861	3.44055	0.00011427	1.57957e-05	6.01961e-07	2.73446e-06	320.859	140.842	8.56945	0.301621	0.0141967	0	0.022176	72.3915	2456.43	166.47	233.155	0.857542	0.0272949	46.842	0.479185	0.000720788	8.10367e-05	1.37468e-05	0.0114068	0.000273038	2.93371e-05	1.52097e-05	9.1833e-07	3451.81
2016	Shandong	0	0	0	0	0	0	0	0	0	0	0	0	0	0	0	0	0	0	0	0	0	0	0	0	0	0	0	0	0	0	0	0
2016	Henan	12.7707	0.387142	19.4853	102.373	0.00340009	0.000469999	1.79112e-05	8.13632e-05	9547.09	4190.72	254.982	8.97467	0.42242	4124.56	0.659842	0	73090.6	4953.29	6937.48	25.516	0.812153	1393.77	14.258	0.0214469	0.00241123	0.000409034	0.339407	0.00812419	0.000872919	0.000452562	2.73248e-05	104679
2016	Hubei	367.603	11.1438	560.882	2946.8	0.0978712	0.0135289	0.000515573	0.00234203	274812	120630	7339.65	258.335	12.1593	118725	18.9935	62002.6	0	142580	199695	734.476	23.3778	40119.7	410.417	0.617348	0.0694071	0.011774	9.76979	0.233854	0.0251269	0.013027	0.000786541	971259
2016	Hunan	0.224569	0.00680796	0.342652	1.8002	5.97911e-05	8.26502e-06	3.14972e-07	1.43079e-06	167.986	73.6948	4.48703	0.157823	0.00743351	72.529	0.0116035	37.8773	1285.28	0	103669	9583.62	12.1362	24.7965	0.254923	7.65989	0.90564	7.31261e-06	0.00604125	0.000144613	1.55426e-05	8.0552e-06	4.86388e-07	114942
2016	Guangdong	0	0	0	0	0	0	0	0	0	0	0	0	0	0	0	0	0	0	0	0	992.624	0	0	0	0	0	0	0	0	0	0	992.624
2016	Guangxi	0.000539889	3.60894e-05	0.00181642	0.00372652	3.16956e-07	4.38134e-08	1.66969e-09	7.58469e-09	11.9474	0.407666	0.374424	0.00099031	0.000620295	0.150209	6.50981e-05	0.0784429	2.65968	3409.6	66729.5	0	7.81185	32.3407	0.472439	860.597	101.75	1.34844e-05	0.00820287	0.000197074	2.16706e-05	1.0919e-05	6.62836e-07	71157.7
2016	Hainan	0	0	0	0	0	0	0	0	0	0	0	0	0	0	0	0	0	0	1976.99	0	0	0	0	0	0	0	0	0	0	0	0	1976.99
2016	Chongqing	3.90944	0.628099	31.6129	15.8011	0.0055163	0.000762527	2.90592e-05	0.000132004	3374.96	2850.55	2170.82	6.77458	3.59631	638.413	1.16322	333.36	11257.7	19481.4	2110.81	100.369	0.247108	0	12195.4	0.982242	0.00948475	0.34808	211.674	5.08551	0.559226	0.281763	0.0171045	54796.5
2016	Sichuan	99.6162	29.1217	1465.72	2.66996	0.255762	0.0353544	0.00134732	0.00612032	97641.2	112988	109184	276.286	180.881	199.433	54.3827	101.958	690.515	931.236	114.81	4.79774	0.0134404	55015	0	0.0453916	0.00045338	17.826	10839.7	260.424	28.6376	14.4288	0.875906	390141
2016	Guizhou	0.307343	0.0467548	2.35322	1.32221	0.000410626	5.67614e-05	2.16312e-06	9.82617e-06	263.392	216.033	159.895	0.511869	0.264893	53.4028	0.0864986	27.8858	942.265	168179	1.0474e+06	37036.7	122.617	87731.6	895.984	0	3.49993	0.0255731	15.5517	0.373631	0.0410861	0.0207011	0.00125666	1.34306e+06
2016	Yunnan	0.101078	0.029535	1.48653	0.00313471	0.000259392	3.58562e-05	1.36645e-06	6.20719e-06	51392	870.346	1368.53	2.30516	2.2672	0.219457	0.0551544	0.112384	1.00514	49.723	353486	1481.3	41.3817	78.8305	633.387	614.636	0	0.0180781	10.9929	0.264106	0.0290425	0.0146328	0.00088829	410035
2016	Tibet	0.158484	0.0463436	2.33252	0.00386664	0.000407014	5.62622e-05	2.1441e-06	9.73975e-06	103.783	120.072	116.586	0.293795	0.193144	0.301977	2.40605	0.212849	0.825874	1.00854	0.131452	0.00519598	1.53887e-05	58.5282	663.681	4.83637e-05	4.91014e-07	0	17.2505	127.34	3856.67	7.05519	0.428293	5079.31
2016	Shaanxi	31413.6	9190.88	462587	614.044	80.7192	11.1579	0.425219	1.93159	14685.4	11906.3	8982.13	28.2678	14.8804	53734.2	17143	27369.2	54677.4	11366.7	5616.21	58.5538	0.657476	44136	48247.5	0.0801393	0.00553327	78.8267	0	81077.1	8154.54	4492.09	272.693	895942
2016	Gansu	927.878	271.475	13663.6	18.1523	2.38424	0.329577	0.0125599	0.0570542	808.634	530.424	10319.5	4.58644	17.0959	1587.77	41385.6	1842.13	1625.78	337.697	166.979	1.7396	0.0195478	1382.15	2316.05	0.00243445	0.00016439	2139.75	101058	0	225223	124070	7531.78	537232
2016	Qinghai	15.83	4.63147	233.107	0.30999	0.040676	0.00562271	0.000214276	0.000973367	54.8749	56.6034	221.565	0.194381	0.367058	27.1003	704.208	31.3872	27.9537	6.13812	2.88952	0.03162	0.000338269	46.684	302.403	6.05367e-05	2.98805e-06	10987.2	1724.08	38103.1	0	2111.08	128.155	54789.9
2016	Ningxia	71.701	20.978	1055.85	1.4018	0.18424	0.0254678	0.000970553	0.00440882	4708.02	368.949	197405	66.9955	327.034	122.657	815204	79.502	124.982	25.9767	12.8768	0.133816	0.00150746	102.034	124.815	0.000184028	1.26454e-05	35.3973	7809.16	37042.4	3725.55	0	124.588	1.06856e+06
2016	Xinjiang	36.9348	10.4121	524.053	12.7397	0.0914448	0.0126406	0.00048172	0.00218825	1154.31	513.388	424.066	1.23121	0.702534	545.979	1580.43	888405	8662.85	595.762	822.728	3.06896	0.0963146	216.788	90.1185	0.00261668	0.000290013	81.7088	3859.04	85511.9	8600.38	4737.74	0	1.00639e+06
2016	Total inflow	1.74693e+06	279093	3.54533e+06	154190	22427.4	1.4682e+06	271539	182837	879672	1.31084e+06	1.27032e+06	32033.3	13527.5	185747	1.39633e+06	1.0045e+06	249149	358564	1.79825e+06	49064.6	1202.91	232689	66485.3	1484.67	106.246	13342.1	165659	243161	249693	140979	8062.01
2015		Beijing	Tianjin	Hebei	Shanxi	Inner Mongolia	Liaoning	Jilin	Heilongjiang	Shanghai	Jiangsu	Zhejiang	Anhui	Fujian	Jiangxi	Shandong	Henan	Hubei	Hunan	Guangdong	Guangxi	Hainan	Chongqing	Sichuan	Guizhou	Yunnan	Tibet	Shaanxi	Gansu	Qinghai	Ningxia	Xinjiang	Total outlow
2015	Beijing	0	92.9897	5276.39	5.15643	0.755281	0.108038	0.00469205	0.0221368	0.0190357	0.475787	0.00205278	0.000297237	1.14265e-06	0.0062543	149.219	0.0242012	0.0956755	0.00780859	0.00882452	3.77896e-05	1.76765e-05	0.00144524	0.000275403	8.20269e-07	3.78818e-09	2.73703e-07	0.0116254	0.000243866	2.30695e-05	0.000683275	4.65115e-07	5525.3
2015	Tianjin	103550	0	2219.83	2.16936	0.317754	0.0454528	0.00197399	0.00931318	0.00800849	0.200168	0.000863626	0.000125051	4.80725e-07	0.00263125	62.7779	0.0101817	0.0402516	0.00328515	0.00371256	1.58984e-05	7.43667e-06	0.000608028	0.000115865	3.45095e-07	1.59373e-09	1.15149e-07	0.00489092	0.000102597	9.70555e-06	0.000287461	1.95678e-07	105835
2015	Hebei	341289	104055	0	5770.03	845.158	120.895	5.25039	24.7711	21.3009	532.404	2.29706	0.332608	0.00127863	6.99855	166976	27.0811	107.061	8.73779	9.87462	0.0422864	0.0197799	1.61723	0.308175	0.000917879	4.23897e-06	0.000306273	13.0088	0.272886	0.0258147	0.764584	0.000520463	619818
2015	Shanxi	453026	18288.3	1.03771e+06	0	148.541	21.248	0.922787	4.35366	18758.5	469550	2005.95	293.338	1.11658	6091.35	29348.3	23859.4	94341.3	7687.71	8700.78	37.2041	17.4286	1357.36	153.277	0.770079	0.00372949	0.14484	6399.53	125.279	11.8515	4.00359	0.239288	2.17794e+06
2015	Inner Mongolia	195737	54832.2	2.13161e+06	145849	0	1.05734e+06	45919.9	216648	822.281	13728.4	256.317	8.60696	0.142675	981.249	93281	942.127	3552.44	408.432	334.39	1.98194	0.669821	723.472	1180.01	0.413691	0.000198678	1.2468	50509.6	1148.19	108.615	6648.78	2.18643	4.02258e+06
2015	Liaoning	217406	61109.3	3266.48	562.682	2606.99	0	1861.65	77.6527	2.17445	52.0118	0.291912	0.0325036	0.000162489	0.957997	108858	2.72913	10.7302	0.916339	0.991996	0.00443644	0.00198708	0.391516	0.431572	0.000223264	4.44727e-07	0.000454281	18.4569	0.417538	0.0394975	2.34534	0.000795165	395842
2015	Jilin	21226.4	5966.09	3999.19	306.22	13030.1	361039	0	1299.3	1.63056	28.7323	0.471194	0.0180035	0.000262284	1.78853	10620.2	1.89106	7.17278	0.794179	0.673438	0.00385283	0.00134897	1.28843	2.08159	0.000736683	3.86224e-07	0.00219925	89.0995	2.02523	0.191579	11.7204	0.00385653	417636
2015	Heilongjiang	4336.74	1218.75	2821.41	199.417	9619.99	71589.3	266222	0	1.10555	18.7528	0.337369	0.011755	0.000187792	1.28854	2165.34	1.27115	4.80133	0.546058	0.451609	0.00264959	0.000904622	0.944123	1.53601	0.000539852	2.65606e-07	0.00162292	65.7477	1.49455	0.141379	8.65306	0.00284598	358280
2015	Shanghai	0.0119385	0.000855339	0.0485333	0.118279	6.94723e-06	9.93759e-07	4.31584e-08	2.03619e-07	0	47607.8	50021.2	107.599	27.8436	6.54747	0.00140173	3.02054	102.991	8.38536	9.50095	0.0405836	0.0190314	1.78751	4.86406	0.00106866	4.06826e-06	0.00174764	0.143004	0.00280395	0.000400672	8.66392e-05	5.43188e-06	97901.9
2015	Jiangsu	2.5325	0.102343	5.80711	28.4446	0.00083125	0.000118905	5.16399e-06	2.43635e-05	189249	0	44876.9	7625.23	24.9801	1574.38	0.164244	726.386	24772.9	2014.73	2284.5	9.74994	4.57611	333.985	1.40775	0.189378	0.000977374	0.000506301	0.0770886	0.00151072	0.000182084	4.742e-05	2.51327e-05	273537
2015	Zhejiang	0.00339766	0.000253886	0.0144059	0.0332185	2.06211e-06	2.94973e-07	1.28105e-08	6.04392e-08	137847	14071.9	0	717.339	3584.29	1.83887	0.000416527	0.848314	28.9242	2.35526	3.01731	0.0113991	0.00604401	0.514697	1.52054	0.000309073	1.14269e-06	0.000546324	0.0446993	0.000876443	0.000125244	2.70811e-05	1.69493e-06	156260
2015	Anhui	0.0876605	0.00355622	0.201785	0.984007	2.88843e-05	4.13172e-06	1.79438e-07	8.46581e-07	22705	422805	757547	0	421.678	54.464	0.00570821	25.1285	856.99	69.6975	79.0707	0.337289	0.158387	11.5685	0.227027	0.00656164	3.38113e-05	8.15873e-05	0.0079042	0.000154954	2.09785e-05	4.81342e-06	1.06499e-06	1.20458e+06
2015	Fujian	2.86882e-05	2.14369e-06	0.000121636	0.000280481	1.74114e-08	2.4906e-09	1.08166e-10	5.10319e-10	1163.92	118.816	54369.4	6.05686	0	0.0155265	3.51695e-06	0.00716274	0.244221	0.0198866	307.898	9.62486e-05	0.616752	0.00434585	0.0128387	2.60966e-06	9.64835e-09	4.61289e-06	0.000377419	7.40026e-06	1.0575e-06	2.28659e-07	1.43111e-08	55967
2015	Jiangxi	0.0333005	0.00134532	0.0763355	0.374043	1.09269e-05	1.56303e-06	6.78816e-08	3.20262e-07	40.2728	18.2305	0.96357	0.0127714	0.000536358	0	0.00215898	9.55188	325.761	26.4934	30.0409	0.12821	0.0601752	4.39142	0.0130728	0.00248998	1.28523e-05	4.70362e-06	0.000853967	1.67337e-05	1.94667e-06	5.26793e-07	3.24528e-07	456.411
2015	Shandong	0	0	0	0	0	0	0	0	0	0	0	0	0	0	0	0	0	0	0	0	0	0	0	0	0	0	0	0	0	0	0	0
2015	Henan	7.49689	0.30287	17.1853	84.2077	0.00245997	0.000351884	1.52821e-05	7.21003e-05	9066.56	4104.21	216.927	2.87522	0.12075	4660.83	0.486084	0	73338.2	5964.43	6763.07	28.8639	13.5472	988.635	2.94308	0.560567	0.00289343	0.00106127	0.192449	0.00703727	0.000747489	0.000219629	0.225251	105262
2015	Hubei	205.169	8.28869	470.314	2304.53	0.0673224	0.00963006	0.000418228	0.00197318	248126	112321	5936.69	78.6867	3.30458	127554	13.3018	58850.5	0	163230	185086	789.923	370.748	27056.2	80.5436	15.3411	0.0791851	0.0289797	5.26141	0.103099	0.0119937	0.00324565	0.00199946	932506
2015	Hunan	0.00770352	0.000311315	0.0176645	0.0865246	2.52856e-06	3.61696e-07	1.57082e-08	7.41107e-08	9.52836	4.22191	0.227869	0.00296475	0.00012684	4.78906	0.00049961	2.20957	75.356	0	98344.7	8629.08	196.995	1.09607	0.00429766	5.22673	0.865015	1.54566e-06	0.000234948	4.60432e-06	5.55148e-07	1.44521e-07	7.64674e-08	107274
2015	Guangdong	0	0	0	0	0	0	0	0	0	0	0	0	0	0	0	0	0	0	0	0	16877.9	0	0	0	0	0	0	0	0	0	0	16877.9
2015	Guangxi	6.28494e-05	1.28432e-05	0.000728742	0.000269011	1.04315e-07	1.49216e-08	6.48036e-10	3.0574e-09	22.4106	0.516181	0.524871	0.00110753	0.000292162	0.014912	2.14139e-05	0.00687113	0.233712	3193.39	77450.1	0	155.141	8.45991	0.134253	550.858	91.1757	4.82366e-05	0.00394329	7.73183e-05	1.1052e-05	2.38897e-06	1.47441e-07	81473
2015	Hainan	0	0	0	0	0	0	0	0	0	0	0	0	0	0	0	0	0	0	1117.75	0	0	0	0	0	0	0	0	0	0	0	0	1117.75
2015	Chongqing	2.53563	0.384573	21.8213	16.5175	0.00312358	0.000446809	1.94047e-05	9.15502e-05	2338.53	1505.29	656.336	1.08552	0.365341	914.842	0.639154	421.844	14369.6	29318.4	3236.58	151.692	6.48322	0	3676.28	683.64	0.0152062	1.32087	107.992	2.11745	0.302661	0.0654251	0.00404501	57434.8
2015	Sichuan	207.196	63.1364	3582.46	5.00744	0.512806	0.0733539	0.00318572	0.0150301	109262	136169	119156	101.409	66.3267	396.233	105.59	135.414	1302.89	1475.8	217.409	7.73538	0.435494	58616.8	0	41.3295	0.000775427	256.358	20955.2	410.88	58.7335	12.6953	0.782408	452608
2015	Guizhou	0.0642199	0.0096602	0.548136	0.421724	7.8462e-05	1.12235e-05	4.87432e-07	2.29968e-06	60.1733	38.107	16.4746	0.0274966	0.00917035	23.3574	0.0160534	10.7705	366.893	167245	1.07769e+06	30082.4	2158.72	31161.9	92.0688	0	3.01558	0.03308	2.70455	0.0530296	0.00757985	0.00163851	0.00010131	1.30895e+06
2015	Yunnan	0.141098	0.04287	2.43251	0.00872137	0.000348198	4.98077e-05	2.16312e-06	1.02055e-05	99156.3	2208.44	2304.17	4.85132	1.28258	0.563537	0.0716949	0.227834	5.52001	32.3302	205125	1277.21	410.887	44.7912	484.254	322.58	0	0.173991	14.2224	0.278865	0.0398626	0.00861634	0.000531026	311396
2015	Tibet	0.0434517	0.0132435	0.751459	0.000922386	0.000107566	1.53867e-05	6.68238e-07	3.15271e-06	10.0929	12.5743	11.0013	0.00936428	0.00612374	0.0760316	0.448899	0.0340321	0.161815	0.145349	0.0242251	0.000758401	4.85256e-05	5.44062	65.8745	0.00383162	7.60253e-08	0	4.39572	41.0914	1411.31	1.26959	0.0782468	1564.84
2015	Shaanxi	28652.8	8734.57	495614	541.971	70.9439	10.1481	0.440726	2.07932	16401.6	15698.3	11453.9	11.565	6.37565	46472.1	14606.9	14883.4	48903.9	10837.6	4899.7	52.7569	9.81463	39437	67722.2	22.5606	0.00528857	65.0002	0	56754.2	5368.99	1753.58	108.073	889096
2015	Gansu	1356.1	413.396	23456.8	25.6577	3.35768	0.480297	0.020859	0.0984117	903.035	900.523	679.747	0.66467	0.378372	2199.85	24464.7	1200.15	2320.6	514.945	232.563	2.50736	0.465849	1933.99	4029.36	1.11539	0.000251348	1641.35	137216	0	216276	70660.8	4354.93	494789
2015	Qinghai	16.4911	5.02719	285.251	0.312056	0.0408318	0.00584075	0.00025366	0.00119676	14.9927	15.9512	12.6423	0.0118067	0.00703716	26.754	297.374	14.5929	28.255	6.31345	2.83482	0.0307616	0.00567845	25.6625	75.2039	0.0150768	3.08367e-06	7246.13	1668.64	27798.7	0	858.888	52.9347	38453.1
2015	Ningxia	312.226	95.1796	5400.64	5.90598	0.773067	0.110583	0.00480254	0.0226581	182.073	175.222	128.446	0.12912	0.0714974	506.412	843392	175.27	533.06	118.149	53.4091	0.575161	0.106984	431.522	759.718	0.247098	5.76566e-05	43.9585	31592.4	60924	5761.45	0	116.012	950709
2015	Xinjiang	53.4231	16.0975	913.396	8.988	0.130747	0.0187025	0.000812241	0.00383211	895.45	424.463	47.0066	0.298673	0.0261656	527.786	950.989	697625	7049.45	585.996	650.804	2.83643	1.30363	168.988	156.901	0.0965487	0.000284335	63.7994	5333.61	88895.7	8406.65	2746.59	0	815525
2015	Total inflow	1.36739e+06	254900	3.71667e+06	155718	26327.7	1.49013e+06	314010	218056	857062	1.24211e+06	1.0497e+06	8960.19	4138.33	192008	1.29529e+06	798918	272406	392751	1.67263e+06	41075.1	20226.1	162318	78491.1	1644.96	95.1652	9319.55	253996	236105	237404	82710.1	4635.48

## Sheet: Table S8
Table S8	Cr transfer embodied in the provincial electricity transmission for the years from 2015 to 2019 (kg)
2019		Beijing	Tianjin	Hebei	Shanxi	Inner Mongolia	Liaoning	Jilin	Heilongjiang	Shanghai	Jiangsu	Zhejiang	Anhui	Fujian	Jiangxi	Shandong	Henan	Hubei	Hunan	Guangdong	Guangxi	Hainan	Chongqing	Sichuan	Guizhou	Yunnan	Tibet	Shaanxi	Gansu	Qinghai	Ningxia	Xinjiang	Total outlow
2019	Beijing	0	74.7062	1001.74	16.6682	0.58334	0.0763863	0.00302338	0.0114676	0.0882948	3.04355	0.00935587	0.00542816	2.41007e-06	0.0127559	0.722325	0.0084087	0.207573	0.00679179	0.0153511	6.85164e-05	8.64206e-07	0.00212316	0.000856739	2.69686e-07	3.96484e-11	3.12454e-07	0.025035	6.99676e-05	2.87812e-06	0.000213677	3.73929e-07	1097.93
2019	Tianjin	76084.9	0	4322.86	71.9292	2.51732	0.329634	0.013047	0.0494868	0.381024	13.134	0.040374	0.0234245	1.04003e-05	0.0550464	3.11709	0.0362866	0.895751	0.029309	0.0662457	0.000295673	3.72936e-06	0.00916222	0.00369714	1.16379e-06	1.71097e-10	1.34835e-06	0.108035	0.000301936	1.24201e-05	0.000922095	1.61364e-06	80500.5
2019	Hebei	77565.9	220187	0	49127.3	1719.32	225.139	8.91101	33.7993	260.238	8970.47	27.5752	15.9988	0.00710337	37.5964	2128.96	24.7836	611.794	20.0179	45.2455	0.201943	0.00254714	6.25775	2.52513	0.000794864	1.16859e-07	0.000920917	73.7874	0.206221	0.00848288	0.629786	0.00110211	361093
2019	Shanxi	248373	26240.2	341290	0	1163.27	152.326	6.02909	22.8682	10491.6	361251	1101.08	644.289	0.283638	1519.49	79190.5	998.016	24754.6	808.275	1830.68	8.15413	0.10306	250.541	95.3594	0.0316475	4.71855e-06	0.0346905	2784.16	7.61245	0.313138	1.355	0.0406833	1.10298e+06
2019	Inner Mongolia	53222.7	104204	668167	55702.1	0	423309	16754.6	63549.8	2109.08	91477.7	725.344	163.166	0.186849	126.248	330832	254.976	715.734	103.523	55.623	1.03717	0.00313135	133.067	324.73	0.0252314	6.00182e-07	0.122546	9600.45	34.7994	1.43147	1140.26	0.185979	1.82271e+06
2019	Liaoning	68045.3	1097.69	7216.01	34852.8	772.228	0	31.3587	15.1815	184.371	6352.73	19.4668	11.3301	0.00501464	26.6607	44728.9	17.551	434.027	14.1903	32.0983	0.143154	0.001807	4.42204	1.74684	0.000560537	8.28391e-08	0.000636503	51.0293	0.141513	0.00582112	0.288944	0.000756289	163910
2019	Jilin	8498.55	2142.13	13755.1	4904.75	62803.3	150858	0	1250.59	61.1483	2471.82	16.2086	4.40878	0.00417533	5.3746	11326.3	6.87258	61.5078	3.56546	4.601	0.0358296	0.000259017	3.06688	6.49186	0.000551026	2.07335e-08	0.00244739	191.861	0.690683	0.0284112	22.1543	0.00369123	258399
2019	Heilongjiang	1665.28	1347.16	8640.75	1216.31	41310.8	24233.7	87022.4	0	29.6146	1260.68	9.54862	2.24861	0.00245972	1.99895	4874.28	3.51162	15.4288	1.52806	1.17541	0.0153235	6.61711e-05	1.76405	4.17392	0.000330464	8.86725e-09	0.00157481	123.391	0.446634	0.0183723	14.5718	0.00238695	171781
2019	Shanghai	0.000128816	1.66561e-05	0.000222527	3.70385e-06	2.13906e-07	2.80102e-08	1.10864e-09	4.20506e-09	0	36269.2	7808.32	64.8438	2.01142	0.210584	6.52764e-05	0.131273	3.48556	0.110658	0.257844	0.00111666	1.45156e-05	0.0481005	0.155899	1.05731e-05	6.46177e-10	5.05301e-05	0.00248322	6.89281e-06	2.83536e-07	8.56858e-07	3.68374e-08	44148.8
2019	Jiangsu	2.67162e-05	3.45444e-06	4.61518e-05	7.68173e-07	4.4314e-08	5.80276e-09	2.29674e-10	8.71147e-10	87383.6	0	11719.1	7198.51	3.01885	0.0356418	1.35381e-05	0.02222	0.589925	0.0187326	0.0438784	0.000189042	2.47018e-06	0.00882855	0.0323333	2.06133e-06	1.09393e-10	1.04799e-05	0.000515017	1.4255e-06	5.86378e-08	1.77206e-07	7.61831e-09	106305
2019	Zhejiang	0.00120539	0.000155859	0.00208229	3.46586e-05	1.98967e-06	2.6054e-07	1.03122e-08	3.91139e-08	95771.8	14176.2	0	76.6072	644.223	0.0395336	0.000610788	0.0250625	0.651096	0.0216156	0.105549	0.000220505	5.94201e-06	0.174278	1.45883	6.73251e-05	1.276e-10	0.000472837	0.0232368	6.35225e-05	2.613e-06	7.8966e-06	3.39485e-07	110671
2019	Anhui	0.000180711	2.33662e-05	0.000312176	5.19599e-06	2.98302e-07	3.90616e-08	1.54606e-09	5.86418e-09	19378.7	239779	372355	0	95.9186	0.00797403	9.1569e-05	0.00503307	0.1315	0.00431546	0.0182699	4.3902e-05	1.02852e-06	0.0264201	0.218707	1.01269e-05	2.54048e-11	7.08874e-05	0.00348364	9.52429e-06	3.91782e-07	1.18398e-06	5.09008e-08	631609
2019	Fujian	3.79904e-05	4.91221e-06	6.56278e-05	1.09234e-06	6.27086e-08	8.21146e-09	3.2501e-10	1.23276e-09	3018.45	446.792	78820.1	2.41444	0	0.00124598	1.92502e-05	0.000789896	0.0205207	0.000690041	102.564	0.00416352	0.00577394	0.00549277	0.0459781	3.04965e-06	2.4093e-09	1.49024e-05	0.000732354	2.00205e-06	8.23544e-08	2.48879e-07	1.06996e-08	82390.4
2019	Jiangxi	5.32757e-06	6.90483e-07	9.21209e-06	1.54013e-07	5.83381e-08	7.63917e-09	3.02359e-10	1.14684e-09	14.397	7.3358	0.234837	0.0130877	6.04939e-05	0	2.84845e-06	4.98785	132.497	4.20254	9.79439	0.0424076	0.000551385	1.14404	0.00641856	0.000131332	2.454e-08	2.0824e-06	0.000102685	4.33029e-06	1.78126e-07	5.38279e-07	2.31424e-08	174.656
2019	Shandong	680.55	4023.49	413.879	6.88665	0.241014	0.0315599	0.00124914	0.00473797	0.03648	1.25748	0.00386549	0.00224271	9.95749e-07	0.00527025	0	0.00347415	0.085761	0.00280611	0.0063425	2.83084e-05	3.57057e-07	0.00087721	0.000353972	1.11424e-07	1.63812e-11	1.29094e-07	0.0103435	2.8908e-05	1.18913e-06	8.82833e-05	1.54493e-07	5126.5
2019	Henan	0.000390529	5.06148e-05	0.000675279	1.12897e-05	4.27639e-06	5.59978e-07	2.2164e-08	8.40674e-08	1055.35	537.74	17.2144	0.959374	0.00443442	586.73	0.000208801	0	9712.47	308.061	717.963	3.10863	0.0404184	83.8623	0.470503	0.00962706	1.79887e-06	0.000152647	0.0075272	0.000317425	1.30573e-05	3.94578e-05	1.69642e-06	13024
2019	Hubei	0.0529571	0.00686354	0.0915701	0.00153092	0.000579893	7.59349e-05	3.00551e-06	1.13998e-05	143110	72919.4	2334.33	130.094	0.601322	79562.6	0.0283142	49580.2	0	41774.1	97358.3	421.541	5.48088	11372	63.8018	1.30546	0.000243933	0.0206995	1.02071	0.043044	0.00177061	0.00535061	0.000230041	498635
2019	Hunan	0.00528512	0.00103414	0.0110354	0.000331513	0.0107284	0.00140485	5.56039e-05	0.000210904	179.568	91.4962	2.9696	0.163421	0.000764969	99.8312	0.0348954	62.2133	1652.55	0	30562.1	9090.65	1.72052	14.3482	0.0852929	2.03059	0.00526049	0.000463393	0.0984193	0.87646	0.0360531	0.108948	0.00468408	41761
2019	Guangdong	5.70321e-09	8.25376e-10	1.03299e-08	2.09001e-10	2.69705e-09	3.53169e-10	1.39785e-11	5.30199e-11	5.37158e-05	2.54729e-05	1.53606e-06	4.55065e-08	3.9569e-10	2.65553e-05	1.09674e-08	1.65504e-05	0.00043957	0.227971	0	107.904	149.886	0.000927697	5.32005e-06	0.0240845	6.24407e-05	1.83358e-09	1.09074e-07	2.19976e-07	9.04872e-09	2.73442e-08	1.17562e-09	258.043
2019	Guangxi	4.47124e-05	6.47084e-06	8.09853e-05	1.63854e-06	2.11445e-05	2.7688e-06	1.09589e-07	4.15669e-07	0.421125	0.199704	0.0120425	0.000356765	3.10216e-06	0.20819	8.5983e-05	0.129753	3.44617	1787.26	47339.1	0	2.665	7.27302	0.0417084	188.819	0.489526	1.43751e-05	0.000855129	0.00172459	7.09407e-05	0.000214375	9.21673e-06	49330.1
2019	Hainan	7.53784e-13	1.09089e-13	1.36529e-12	2.76233e-14	3.56465e-13	4.66778e-14	1.84751e-15	7.00756e-15	7.09953e-09	3.36672e-09	2.03019e-10	6.01452e-12	5.22977e-14	3.50977e-09	1.44954e-12	2.18744e-09	5.80972e-08	3.01305e-05	351.893	0.0142615	0	1.22612e-07	7.03142e-10	3.18321e-06	8.25268e-09	2.42342e-13	1.44162e-11	2.90739e-11	1.19595e-12	3.61404e-12	1.5538e-13	351.907
2019	Chongqing	1.88156	0.243289	3.25037	0.0541009	0.00313138	0.000410043	1.62295e-05	6.15582e-05	1463.56	940.867	305.823	1.68427	0.0787799	670.794	0.953489	418.678	11098.8	2205.3	898.024	22.1773	0.0505551	0	2277.16	43.2696	1.28333e-05	0.738073	36.2715	0.101248	0.00416484	0.0125863	0.000541103	20389.8
2019	Sichuan	828.81	107.166	1431.76	23.8308	1.3679	0.179122	0.00708966	0.0268909	113830	143975	126083	259.366	32.4791	331.582	419.969	500.026	3202.04	764.453	275.359	7.75451	0.0155016	115996	0	45.8519	4.4873e-06	325.116	15977.3	43.6636	1.7961	5.42791	0.233352	524470
2019	Guizhou	0.161705	0.0209302	0.279459	0.00466052	0.000925561	0.000121199	4.79706e-06	1.81951e-05	136.526	86.301	26.4122	0.154467	0.00680378	63.6473	0.0839174	39.7197	1053.14	55870.5	327955	2582.41	18.4626	34836.8	195.316	0	0.00149436	0.0633327	3.11703	0.0623565	0.00256503	0.00775129	0.000333253	422868
2019	Yunnan	1.39236	0.180034	2.40527	0.0400344	0.00229813	0.000300931	1.19109e-05	4.51777e-05	76833.1	5625.62	1370.87	10.061	0.353135	0.589527	0.705525	0.86026	5.91703	11.9033	716524	5018.2	40.3374	194.915	1685.11	1.20721	0	0.546178	26.8409	0.0733628	0.00301777	0.00911986	0.000392074	807355
2019	Tibet	482.912	62.4412	834.223	13.8852	0.797013	0.104366	0.00413082	0.0156681	926.271	1172.27	1024.59	2.11699	0.263935	83.2984	244.698	222.858	46.4487	82.878	6.29588	0.829585	0.000354432	1027.18	8141.85	0.381454	4.80056e-07	0	9309.27	25.4406	1.0465	3.16256	0.135962	23715.7
2019	Shaanxi	82998.5	10731.8	143379	2386.45	136.983	17.9375	0.709966	2.69289	6544.84	8400.43	7008.37	16.0367	1.80536	14060	42056.4	38142.9	3736.64	13398.1	722.268	133.971	0.0406608	21178.7	54110.5	4.08994	7.75251e-05	19.711	0	4372.49	179.862	543.552	23.368	454308
2019	Gansu	7448.05	1463.65	15585.8	470.409	15311.5	2004.99	79.3577	301.002	3038.49	1840.57	57899.8	265.175	14.915	1237.38	49754.9	4278.67	640.259	167676	5660.52	1676.39	0.318665	2086.2	6839.61	0.824544	0.000970079	624.12	138635	0	51455.2	155492	6685.14	698466
2019	Qinghai	1609.42	311.742	3343.25	99.3281	3170.06	415.108	16.43	62.3187	758.881	549.652	12137.6	95.4565	3.12665	267.845	10335	1065.51	139.623	34725.6	1172.82	347.181	0.0660252	575.372	2553.14	0.223982	0.000200903	15057.8	30001.8	258975	0	32191.9	2416.23	412398
2019	Ningxia	2181.9	3854.71	23176.2	1891.49	109186	14297.5	565.897	2146.44	15669	5430.67	406617	19.7753	104.745	61.1304	329247	169.03	41.4563	1170.01	42.2075	11.6977	0.00237611	91.6579	243.915	0.0205073	6.76909e-06	4.24193	6780.34	8373.15	344.429	0	44.7488	931766
2019	Xinjiang	423.814	83.2858	886.874	26.7675	871.267	114.089	4.51566	17.1278	1393.7	13193.7	23488.9	108146	6.05075	164.905	2831.19	399249	1600.65	9590.83	437.729	95.892	0.0246424	132.218	389.279	0.0484697	5.54898e-05	35.5141	7888.7	71178.8	2927.94	8847.89	0	654027
2019	Total inflow	630113	375931	1.23345e+06	150811	236450	615628	104490	67401.9	583643	1.01724e+06	1.11092e+06	117131	910.092	98908.3	907975	495041	59665.1	330321	1.23211e+06	19529.4	219.228	187997	76937.3	288.166	0.497924	16068.1	221485	343014	54912.1	198263	9170.09
2018		Beijing	Tianjin	Hebei	Shanxi	Inner Mongolia	Liaoning	Jilin	Heilongjiang	Shanghai	Jiangsu	Zhejiang	Anhui	Fujian	Jiangxi	Shandong	Henan	Hubei	Hunan	Guangdong	Guangxi	Hainan	Chongqing	Sichuan	Guizhou	Yunnan	Tibet	Shaanxi	Gansu	Qinghai	Ningxia	Xinjiang	Total outlow
2018	Beijing	0	71.492	1702.66	15.3719	0.945132	0.126317	0.00803932	0.0182652	0.0632726	2.43416	0.00957316	0.00498271	2.69801e-06	0.0119897	0.617427	0.00907024	0.189657	0.00817352	0.015881	3.32051e-05	1.11037e-06	0.00167224	0.000797147	8.83283e-08	5.96604e-11	1.5813e-07	0.0210665	0.000138612	7.48046e-06	0.000482437	2.57066e-07	1794.01
2018	Tianjin	77242.8	0	1948.21	17.5888	1.08144	0.144535	0.00919875	0.0208994	0.0723978	2.78522	0.0109538	0.00570131	3.08711e-06	0.0137188	0.706472	0.0103783	0.217009	0.0093523	0.0181714	3.79939e-05	1.27051e-06	0.0019134	0.000912111	1.01067e-07	6.82646e-11	1.80936e-07	0.0241047	0.000158603	8.55929e-06	0.000552014	2.9414e-07	79213.7
2018	Hebei	160624	106538	0	22907.3	1408.44	188.239	11.9802	27.2188	94.2892	3627.4	14.266	7.42525	0.00402058	17.867	920.092	13.5165	282.627	12.1802	23.666	0.0494823	0.00165468	2.49197	1.18791	0.000131627	8.89061e-08	0.000235647	31.3933	0.20656	0.0111474	0.71893	0.000383081	296754
2018	Shanxi	209302	13144	306183	0	556.401	74.3634	4.73276	10.7527	7406.21	284575	1098.84	582.518	0.309685	1403.33	66698.6	1053.85	22263.2	955.226	1864.06	3.88133	0.130331	190.092	78.1906	0.0099423	6.97369e-06	0.0150367	2061.64	12.903	0.696334	1.35507	0.0239295	919526
2018	Inner Mongolia	78864.1	94149.1	665339	43472.5	0	392880	25004.3	56809.4	751.881	38228.2	691.717	78.3645	0.194947	144.728	155591	316.52	567.138	137.135	51.7378	0.538113	0.0036174	170.104	411.65	0.0116043	9.66841e-07	0.0942701	11004.5	90.0218	4.85818	1472.01	0.166952	1.56623e+06
2018	Liaoning	64776	22096.5	1521.72	23.4039	759.119	0	102.247	14.6787	0.244143	11.7924	0.186042	0.0241677	5.24324e-05	0.0468443	67104.1	0.0888489	0.296696	0.0418596	0.02594	0.000165153	1.81367e-06	0.04521	0.106831	3.06375e-06	2.96735e-10	2.44455e-05	2.85569	0.0233341	0.00125926	0.380137	4.32747e-05	156414
2018	Jilin	7841.47	3631.66	9624.08	620.94	41902.4	129037	0	857.166	10.7228	545.122	9.86082	1.11745	0.00277908	2.064	9174.61	4.51255	8.09984	1.95546	0.738799	0.00767322	5.16554e-05	2.42487	5.8679	0.00016542	1.37867e-08	0.00134378	156.865	1.28322	0.0692512	20.9827	0.00237983	203461
2018	Heilongjiang	1430.64	952.135	4612.75	300.351	20298.4	18995.3	72286.9	0	5.19255	263.999	4.77652	0.541174	0.00134617	0.999499	1992.04	2.18572	3.91824	0.94703	0.35743	0.00371612	2.49908e-05	1.17461	2.84252	8.01304e-05	6.67684e-09	0.000650952	75.9883	0.621617	0.0335466	10.1645	0.00115283	121242
2018	Shanghai	0.000112443	7.44395e-05	0.00177281	1.80448e-05	1.04627e-06	1.39834e-07	8.89958e-09	2.02197e-08	0	36427.5	9671.74	76.4933	2.72579	0.0600042	2.80988e-06	0.0436288	0.963849	0.041066	0.0808214	0.000166948	5.65087e-06	0.0652735	0.492055	7.77244e-06	2.9996e-10	3.91603e-05	0.0137966	8.64165e-05	4.73463e-06	7.26335e-06	1.60323e-07	46180.2
2018	Jiangsu	1.8206e-05	1.20586e-05	0.000287181	2.83786e-06	1.69467e-07	2.26493e-08	1.44149e-09	3.27503e-09	61151.9	0	13910	7827.08	3.92026	0.00721657	4.51946e-07	0.00525823	0.115828	0.0049604	0.00988259	2.01775e-05	6.90971e-07	0.0102867	0.0797132	1.24504e-06	3.62535e-11	6.34399e-06	0.00223506	1.39954e-05	7.66791e-07	1.17632e-06	2.59647e-08	82893.2
2018	Zhejiang	0.000899174	0.00059638	0.0142031	0.000128625	8.37844e-06	1.11978e-06	7.12672e-08	1.61918e-07	91101.8	14418.5	0	511.846	672.314	0.0125793	2.19072e-05	0.0112197	0.184813	0.0126264	0.0473058	5.35215e-05	3.30753e-06	0.469256	3.94292	5.96447e-05	9.61635e-11	0.000313798	0.110555	0.000691699	3.78978e-05	5.81381e-05	1.28326e-06	106709
2018	Anhui	0.000116293	7.71304e-05	0.0018369	1.66495e-05	1.0836e-06	1.44823e-07	9.2171e-09	2.09411e-08	15346	231603	306460	0	86.3698	0.00204522	2.83383e-06	0.00175337	0.0306371	0.00191569	0.00665444	8.06935e-06	4.65265e-07	0.0607374	0.509942	7.71626e-06	1.44984e-11	4.05837e-05	0.0142981	8.94588e-05	4.9014e-06	7.51911e-06	1.65967e-07	553496
2018	Fujian	2.55431e-05	1.69415e-05	0.000403471	3.65389e-06	2.38008e-07	3.181e-08	2.02451e-09	4.59964e-09	2587.95	409.59	67766.2	14.5401	0	0.000357342	6.22324e-07	0.000318721	0.00525003	0.000364998	51.6487	0.00458071	0.00361117	0.0133303	0.112008	2.78198e-06	8.23028e-09	8.91413e-06	0.00314056	1.96493e-05	1.07657e-06	1.65154e-06	3.6454e-08	70830.1
2018	Jiangxi	3.07547e-05	2.72876e-06	6.40182e-05	0.000253902	9.92845e-08	1.32694e-08	8.44517e-10	1.91872e-09	15.3995	5.61722	0.3083	0.0115563	8.68883e-05	0	9.70408e-06	5.37571	119.762	5.02712	10.0233	0.0204454	0.000700808	0.855227	0.00576829	4.19914e-05	3.67347e-08	4.67439e-07	0.000163499	1.3252e-05	7.15992e-07	1.10759e-06	2.45775e-08	162.407
2018	Shandong	555.657	873.368	6999.74	63.195	3.8855	0.5193	0.0330502	0.0750894	0.260118	10.007	0.0393559	0.0204843	1.10917e-05	0.0492903	0	0.0372884	0.779693	0.0336019	0.0652881	0.000136508	4.56481e-06	0.00687468	0.00327713	3.63124e-07	2.45268e-10	6.50086e-07	0.0866057	0.000569844	3.07527e-05	0.00198333	1.05682e-06	8507.86
2018	Henan	0.00390415	0.000864976	0.0205053	0.0249089	1.80972e-05	2.4187e-06	1.53935e-07	3.49737e-07	1502.95	548.227	30.0898	1.12786	0.00848024	725.999	0.000968966	0	11688.5	490.635	978.248	1.99542	0.0683971	83.4697	0.567122	0.00409837	3.58523e-06	4.64255e-05	0.126934	0.00198759	0.000107344	0.000166096	3.68619e-06	16052
2018	Hubei	0.296593	0.0263157	0.617381	2.44859	0.000957484	0.000127968	8.14439e-06	1.85039e-05	148510	54171.6	2973.2	111.447	0.837937	71737.6	0.0935846	51842.5	0	48480.7	96663	197.172	6.75849	8247.67	55.6285	0.404958	0.000354264	0.00450791	1.57676	0.1278	0.00690492	0.0106814	0.000237021	483004
2018	Hunan	0.00173988	0.00114362	0.0263146	0.000777312	0.00143535	0.000191835	1.22091e-05	2.77389e-05	31.7135	11.5685	0.692636	0.0238618	0.000195206	15.3193	0.0481441	11.0751	246.607	0	30964.5	3199.01	2.16498	1.78915	0.0203258	0.759897	0.00574774	0.00136921	0.201021	1.99995	0.107929	0.167069	0.00370904	34487.8
2018	Guangdong	3.41203e-09	2.25245e-09	5.32976e-08	7.80875e-10	5.63398e-10	7.52985e-11	4.79228e-12	1.0888e-11	5.54761e-05	1.1051e-05	2.58236e-06	2.31535e-08	7.27787e-10	8.60468e-06	1.81077e-08	6.22645e-06	0.000138468	0.307818	0	223.098	175.932	0.0017442	1.20621e-05	0.0529897	0.000400847	1.47233e-09	4.13307e-07	7.51394e-07	4.05515e-08	6.27702e-08	1.39352e-09	399.394
2018	Guangxi	1.02876e-05	6.79137e-06	0.000160698	2.35442e-06	1.69871e-06	2.27033e-07	1.44492e-08	3.28284e-08	0.167266	0.0333199	0.00778609	6.98104e-05	2.19436e-06	0.025944	5.45967e-05	0.0187734	0.417496	928.106	46276.3	0	3.23555	5.25896	0.0363686	159.77	1.2086	4.43925e-06	0.00124617	0.00226553	0.000122267	0.000189259	4.2016e-06	47374.6
2018	Hainan	6.86277e-13	4.53044e-13	1.072e-11	1.57061e-13	1.13319e-13	1.51451e-14	9.63892e-16	2.18994e-15	1.11582e-08	2.22273e-09	5.19401e-10	4.65697e-12	1.46383e-13	1.7307e-09	3.64208e-12	1.25235e-09	2.78507e-08	6.19129e-05	506.107	0.0448728	0	3.50819e-07	2.42611e-09	1.06581e-05	8.06241e-08	2.96137e-13	8.31302e-11	1.51131e-10	8.1563e-12	1.26252e-11	2.80284e-13	506.152
2018	Chongqing	0.604335	0.399315	9.50981	0.107791	0.00562058	0.000751194	4.78088e-05	0.000108621	1654.01	916.574	358.687	1.94802	0.101089	644.711	0.0156746	467.337	10367.9	3595.34	992.417	14.1341	0.0693878	0	2638.96	17.0367	2.53951e-05	0.210028	73.9943	0.47168	0.0258359	0.0396407	0.00087507	21754.6
2018	Sichuan	204.901	135.907	3236.7	29.229	1.90932	0.255181	0.0162407	0.0368985	109643	146671	113071	322.984	31.8668	429.595	4.98922	795.641	2880.26	1230.41	287.369	4.85942	0.0200923	106658	0	13.5784	8.73104e-06	71.5106	25194.1	157.626	8.63624	13.2486	0.292433	511099
2018	Guizhou	0.0429217	0.0283603	0.675356	0.00768201	0.00047924	6.40508e-05	4.07643e-06	9.26157e-06	118.994	65.6017	25.4559	0.139384	0.00717426	46.5488	0.00382631	33.7406	748.588	46598.6	283179	3154.47	19.7993	27797.3	187	0	0.00566772	0.01496	5.25463	0.146232	0.00791857	0.0122326	0.000271219	361981
2018	Yunnan	0.144198	0.095644	2.27781	0.0205711	0.00134373	0.000179591	1.14298e-05	2.59683e-05	70377.9	5132.85	1414.96	10.7889	0.398779	0.339899	0.00351321	0.587082	2.6319	35.4678	640311	3869.99	44.7693	92.5313	632.346	531.406	0	0.0503253	17.7302	0.111013	0.00608225	0.00933069	0.000205954	722478
2018	Tibet	45.2359	30.0176	714.41	6.45953	1.15428	0.15427	0.00981831	0.022307	207.244	274.999	240.821	0.614315	0.0678708	56.5788	25.922	147.966	20.299	60.982	3.97282	0.237682	0.000277771	257.471	1673.06	0.0278895	4.2705e-07	0	5559.28	56.7031	139.667	89.109	0.214921	9612.7
2018	Shaanxi	11182.9	7417.41	176649	1594.91	104.167	13.922	0.886045	2.01308	6767.66	8822.68	6726.23	19.6297	1.89566	13923.6	270.996	36542.2	3886.37	13974.6	845.912	54.4442	0.0591445	20776.1	51431.3	1.42613	9.78213e-05	9.96884	0	8601.5	464.196	718.595	15.9521	370821
2018	Gansu	1006.22	683.003	15714.2	152.74	861.358	115.121	7.32674	16.6462	1955.1	1071.03	34673.8	39.4596	9.77212	1222.78	28883.6	3470.39	390.814	159412	6036.02	620.683	0.422027	1874.9	4966.73	0.278197	0.0011152	821.2	120446	0	64777.1	100272	2226.1	551727
2018	Qinghai	138.818	94.0942	2169.47	20.9934	111.577	14.9124	0.94908	2.15629	292.949	193.175	4531.15	17.7317	1.27702	169.038	3739.01	587.765	54.9801	20620.3	781.135	80.2865	0.0546154	292.11	965.192	0.0413509	0.000144253	14619.3	16644.6	155187	0	12980.1	1208.08	235518
2018	Ningxia	367.475	414.596	3827.43	153.562	9338.41	1248.08	79.4327	180.47	14284.3	2435.61	372809	80.7654	105.069	94.1245	316212	250.271	28.6837	2186.09	84.6973	8.51189	0.00592187	141.033	353.833	0.0116618	1.52935e-05	10.9144	9280.15	15919.9	859.132	0	29.5245	750782
2018	Xinjiang	66.3372	45.0281	1035.99	10.0729	56.7863	7.58953	0.483026	1.09743	618.286	4595.67	8183.66	35238	2.3064	174.45	1904.19	311545	1536.52	10572.9	524.374	41.1774	0.0366632	134.395	327.522	0.0188704	7.39845e-05	54.1388	7940.59	79133.6	4270.52	6610.57	0	474631
2018	Total inflow	613650	250277	1.20129e+06	69391.2	75406.1	542576	97499.4	57921.7	534437	835042	944667	44944.7	919.451	90810	652522	407091	55100	309299	1.11044e+06	11474.6	253.536	166730	63737.2	724.839	1.22226	15587.4	198497	259164	70525.1	122189	3480.36
2017		Beijing	Tianjin	Hebei	Shanxi	Inner Mongolia	Liaoning	Jilin	Heilongjiang	Shanghai	Jiangsu	Zhejiang	Anhui	Fujian	Jiangxi	Shandong	Henan	Hubei	Hunan	Guangdong	Guangxi	Hainan	Chongqing	Sichuan	Guizhou	Yunnan	Tibet	Shaanxi	Gansu	Qinghai	Ningxia	Xinjiang	Total outlow
2017	Beijing	0	62.133	1219.89	9.65818	0.723878	0.100267	0.00398025	0.0164432	0.0200208	1.22107	0.00546723	0.00187104	3.27819e-06	0.000611739	0.320493	0.139395	0.00816373	0.000636542	0.000773391	4.02402e-06	5.21863e-08	0.000307194	0.000256372	5.8016e-09	1.84388e-10	3.29663e-07	0.0127252	0.000295305	2.83135e-05	0.000471987	1.18049e-06	1294.26
2017	Tianjin	33296.1	0	159.191	1.26035	0.094463	0.0130845	0.000519406	0.00214576	0.00261264	0.159345	0.000713451	0.000244163	4.2779e-07	7.98294e-05	0.041823	0.0181904	0.00106533	8.3066e-05	0.000100924	5.25118e-07	6.8101e-09	4.00876e-05	3.34555e-05	7.57085e-10	2.40618e-11	4.30197e-08	0.00166059	3.8536e-05	3.69479e-06	6.15924e-05	1.54049e-07	33456.8
2017	Hebei	133047	106255	0	16516.7	1237.92	171.469	6.8067	28.1198	34.238	2088.18	9.34962	3.1997	0.0056061	1.04615	548.082	238.382	13.961	1.08856	1.32259	0.00688155	8.92449e-05	0.525339	0.438427	9.92144e-06	3.15325e-07	0.000563764	21.7617	0.505007	0.0484195	0.807155	0.00201877	260226
2017	Shanxi	161405	13283.7	257724	0	351.438	48.6792	1.93238	7.98305	3103.09	189383	832.09	290.188	0.498926	89.5687	48886.4	21605.3	1264.96	93.1228	119.604	0.589159	0.00807056	40.9841	29.6494	0.000721878	2.69963e-05	0.0372513	1469.32	33.3463	3.19721	2.11087	0.133302	700071
2017	Inner Mongolia	88559.4	91113.3	678824	41340.3	0	359028	14252.1	58878.1	133.904	5271.55	390.345	8.13235	0.234053	125.456	20368.3	930.26	63.0841	132.333	11.3297	0.825804	0.000764495	155.393	235.032	0.00414075	3.78398e-05	0.322446	11720.5	289.362	27.7436	1646.52	1.15673	1.37351e+06
2017	Liaoning	101597	519.836	904.111	14.3045	515.483	0	151.156	11.828	0.0392313	1.81743	0.0810087	0.00279572	4.85733e-05	0.0253138	37975.7	0.27274	0.0176826	0.0266958	0.00273887	0.000166624	1.84812e-07	0.0310702	0.0468624	8.26422e-07	7.63501e-09	6.42775e-05	2.33687	0.0576821	0.00553048	0.32746	0.000230585	141695
2017	Jilin	12226.4	218.952	1278.45	73.0142	4532.59	118166	0	466.057	0.235655	9.30971	0.682994	0.014361	0.000409528	0.219428	4548.11	1.63716	0.110925	0.231454	0.0198698	0.00144436	1.34076e-06	0.271754	0.411013	7.24124e-06	6.61831e-08	0.000563875	20.4962	0.50602	0.0485165	2.87925	0.00202282	141547
2017	Heilongjiang	1775.75	87.95	605.618	36.2006	2263.36	16850.6	63903.6	0	0.117138	4.61605	0.340911	0.00712098	0.000204413	0.109556	652.673	0.813782	0.0551718	0.115561	0.00990135	0.000721143	6.68115e-07	0.135694	0.205235	3.61581e-06	3.30441e-08	0.000281566	10.2346	0.252677	0.0242263	1.43776	0.00101008	86194.3
2017	Shanghai	8.86526e-05	7.07053e-05	0.00138819	1.22186e-05	8.23911e-07	1.14123e-07	4.53028e-09	1.87154e-08	0	27243	10390.1	43.2786	6.22999	0.0302402	0.000800728	0.0232248	0.512837	0.0320418	0.0489451	0.000203295	3.30268e-06	0.0564498	0.436262	7.13899e-06	9.31537e-09	1.60433e-05	0.0110924	0.000288905	2.94352e-05	0.00259268	1.15615e-06	37683.8
2017	Jiangsu	1.00136e-05	7.98699e-06	0.000156813	1.373e-06	9.30694e-08	1.28914e-08	5.11743e-10	2.11411e-09	53153.7	0	14854.9	5235.35	8.90707	0.00323703	0.00113847	0.00248739	0.0548851	0.00343513	0.00615481	2.18603e-05	4.1531e-07	0.00623699	0.0484775	7.92987e-07	1.00168e-09	1.83606e-06	0.00124991	8.12427e-05	7.98212e-06	0.00368798	3.24908e-07	73253
2017	Zhejiang	8.9054e-05	7.11071e-05	0.00139608	1.12304e-05	8.28454e-07	1.14753e-07	4.55526e-09	1.88187e-08	67125.4	6795.49	0	311.05	1206.33	0.00423305	0.15412	0.00344349	0.0701698	0.00525212	0.140785	4.28997e-05	9.4998e-06	0.0363378	0.321221	5.21253e-06	1.96574e-09	1.96128e-05	0.0107002	0.00740136	0.000710887	0.499278	2.9588e-05	75439.5
2017	Anhui	1.07395e-05	8.57474e-06	0.000168352	1.3602e-06	9.99033e-08	1.3838e-08	5.49319e-10	2.26934e-09	10522.7	182655	231371	0	138.732	0.00065746	0.0177243	0.000527065	0.0109638	0.000784801	0.016463	6.08039e-06	1.11088e-06	0.00449668	0.0393956	6.3962e-07	2.78614e-10	2.34555e-06	0.00129288	0.000852594	8.18996e-05	0.0574186	3.40837e-06	424688
2017	Fujian	1.40481e-06	1.1217e-06	2.2023e-05	1.77157e-07	1.30687e-08	1.8102e-09	7.18584e-11	2.96861e-10	1058.89	107.198	31736.9	4.90675	0	6.67758e-05	0.00243122	5.43207e-05	0.00110692	0.000100924	103.008	0.00742382	0.00695068	0.000573323	0.0050672	3.13609e-06	3.40173e-07	3.09388e-07	0.000168794	0.000116755	1.12141e-05	0.00787602	4.66745e-07	33010.9
2017	Jiangxi	6.57953e-05	1.03394e-05	0.000201874	0.00054768	1.92255e-07	2.66301e-08	1.05712e-09	4.36715e-09	28.0006	14.3354	0.64299	0.0220525	0.000385541	0	1.92765e-05	10.2809	230.15	14.0415	21.6392	0.089096	0.00146016	3.93703	0.0338206	3.72009e-05	4.08254e-06	1.30338e-06	0.000862168	7.73666e-05	7.55216e-06	4.54371e-06	3.09371e-07	323.176
2017	Shandong	82.7672	66.1	1297.78	10.2748	0.770095	0.106669	0.00423437	0.017493	0.0212991	1.29904	0.0058163	0.0019905	3.48749e-06	0.000650797	0	0.148295	0.00868496	0.000677183	0.00082277	4.28094e-06	5.55182e-08	0.000326808	0.000272741	6.17202e-09	1.9616e-10	3.50712e-07	0.0135377	0.000314159	3.01212e-05	0.000502122	1.25586e-06	1459.32
2017	Henan	0.00368583	0.000579209	0.0113089	0.0306808	1.07701e-05	1.49181e-06	5.92193e-08	2.44646e-07	1568.58	803.065	36.02	1.23537	0.0215979	757.352	0.00107986	0	12892.9	786.601	1212.22	4.99112	0.0817974	220.551	1.89462	0.00208398	0.000228702	7.30149e-05	0.0482983	0.00433405	0.000423069	0.000254537	1.73308e-05	18285.6
2017	Hubei	0.258911	0.0406866	0.794394	2.15517	0.000756543	0.000104792	4.15986e-06	1.71852e-05	110185	56411.3	2530.23	86.7788	1.51714	53200.2	0.075855	40456.3	0	55254.8	85152.5	350.601	5.74586	15492.6	133.087	0.146389	0.0160652	0.00512893	3.39271	0.304445	0.0297185	0.01788	0.0012174	419268
2017	Hunan	0.00101058	0.000791294	0.0155355	0.000327188	9.24578e-06	1.28067e-06	5.0838e-08	2.10022e-07	10.4834	5.35907	0.270989	0.00824855	0.000162487	5.05337	0.0458148	3.84687	86.0051	0	26703	3963.83	1.80185	1.52679	0.0178184	1.63071	0.18163	0.00284185	0.123765	2.61851	0.251051	0.148384	0.0104675	30786.3
2017	Guangdong	6.51389e-09	5.17984e-09	1.01698e-07	1.09393e-09	6.03855e-11	8.36424e-12	3.3203e-13	1.37168e-12	0.000775743	5.42627e-05	2.121e-05	8.62793e-08	1.27176e-08	7.1372e-06	2.95298e-08	5.44518e-06	0.000121358	0.405155	0	166.413	155.818	0.0022569	2.88952e-05	0.068462	0.00762534	2.87123e-09	8.12435e-07	1.68599e-06	1.6176e-07	9.55461e-08	6.73987e-09	322.715
2017	Guangxi	1.92301e-05	1.52917e-05	0.000300229	3.22946e-06	1.78268e-07	2.46926e-08	9.80206e-10	4.04942e-09	2.29012	0.160192	0.0626153	0.000254711	3.75445e-05	0.0210702	8.71769e-05	0.0160751	0.358268	1196.08	33527.2	0	2.26233	6.66272	0.0853034	202.111	22.5112	8.47634e-06	0.00239844	0.00497733	0.000477543	0.000282068	1.98972e-05	34959.9
2017	Hainan	1.12125e-12	8.91615e-13	1.75055e-11	1.883e-13	1.03943e-14	1.43975e-15	5.71529e-17	2.3611e-16	1.3353e-07	9.34033e-09	3.65091e-09	1.48514e-11	2.18911e-12	1.22854e-09	5.08303e-12	9.37289e-10	2.08895e-08	6.97401e-05	397.485	0.028645	0	3.88484e-07	4.97379e-09	1.17845e-05	1.31256e-06	4.9423e-13	1.39846e-10	2.90213e-10	2.78441e-11	1.64465e-11	1.16015e-12	397.514
2017	Chongqing	0.577628	0.459515	9.02186	0.0946383	0.00535661	0.000741967	2.94534e-05	0.000121678	1597.54	1117.88	520.595	1.78997	0.312152	573.574	0.0321497	437.661	9751.6	4980.2	1101.09	31.1266	0.0742984	0	2838.37	0.0587084	0.00142628	0.104138	72.084	1.65685	0.170148	0.0940215	0.00663138	23036.2
2017	Sichuan	155.651	124.305	2440.55	19.348	1.44822	0.200599	0.00796303	0.0328968	111632	138382	133594	231.913	80.104	350.509	8.3989	668.458	2517.08	1476.58	296.618	9.25478	0.020015	84007.1	0	12.4269	0.000424071	28.1777	19508.4	442.859	45.5167	25.1297	1.77253	496060
2017	Guizhou	0.0425388	0.0338396	0.664387	0.0069808	0.000394473	5.46401e-05	2.16901e-06	8.9606e-06	118.193	82.5629	38.2942	0.132178	0.0229614	42.5226	0.00555872	32.4459	722.953	44685.9	261824	1975.17	17.6672	24310.4	208.683	0	0.0905059	0.00785459	5.30838	0.304423	0.0300173	0.0172606	0.00121753	334065
2017	Yunnan	0.174724	0.139536	2.73959	0.0217211	0.00162567	0.000225178	8.93874e-06	3.69276e-05	68595.5	3910.73	1582.2	6.22619	0.948695	0.452888	0.00954246	0.795559	3.83725	66.2232	557665	2650.47	37.6297	125.924	862.294	961.009	0	0.0316306	21.8988	0.497393	0.0511198	0.0285793	0.0019908	636494
2017	Tibet	0.404815	0.323291	6.34734	0.0503154	0.00376649	0.000521713	2.07101e-05	8.55573e-05	205.017	254.009	248.764	0.426219	0.14916	0.800777	5.5557	2.46369	4.66274	20.1218	1.27972	0.125586	8.63518e-05	154.354	1409.93	0.0228535	5.75457e-06	0	50.7207	317.51	6319	17.9925	5.78605	9025.82
2017	Shaanxi	8058.13	6435.36	126349	1001.35	74.975	10.3851	0.41225	1.70309	3241.82	3923.06	3786.47	6.57446	2.27039	10634.5	434.133	28894.3	2437.03	11110.4	689.698	69.3137	0.0465389	13338.9	20250.9	0.35602	0.00317608	25.5982	0	22918.8	2197.43	1298.8	91.6184	267283
2017	Gansu	407.306	325.281	6386.43	50.6143	3.78968	0.524925	0.0208376	0.0860841	691.528	390	12482.8	2.46268	7.48476	537.803	18925.4	2064.63	137.759	59480.3	2511.09	370.988	0.169441	764.609	1855.95	0.182639	0.0169993	1173.9	50993.3	0	103721	61304.2	4324.62	328914
2017	Qinghai	20.7179	16.5457	324.85	2.57454	0.192765	0.0267007	0.00105992	0.00437873	79.485	74.7716	686.099	0.217048	0.41139	27.4565	959.785	214.603	8.7207	3017.11	127.534	18.8182	0.00860565	72.1455	399.14	0.0141968	0.000862285	12388.7	2593.82	54863.8	0	3108.99	1001.79	80008.3
2017	Ningxia	48.1966	38.4906	755.708	5.98828	0.448434	0.0621145	0.00246572	0.0101864	6664.28	694.838	199220	30.8345	119.454	53.894	310011	154.484	12.5515	841.369	36.5037	5.24783	0.00246317	68.802	113.743	0.00399843	0.000240465	15.7542	5117.19	14515.6	1391.69	0	58.0263	539975
2017	Xinjiang	22.0495	17.6086	345.72	2.74533	0.20515	0.0284162	0.00112802	0.00466005	314.101	162.757	682.086	0.351208	0.408983	162.695	1024.49	339334	2281.51	3358.6	349.745	20.9631	0.0235998	80.2915	100.803	0.0102544	0.000960568	63.547	2760.44	58562.7	5614.73	3318.59	0	418582
2017	Total inflow	540704	218565	1.07864e+06	59086.6	8983.45	494276	78316.1	59394	440066	619789	644995	6265.1	1574.05	66563.3	444349	435052	32430	186516	971852	9638.87	221.369	138845	28441.6	1178.05	22.8315	13696.2	94371.5	151951	119321	70728.6	5484.93
2016		Beijing	Tianjin	Hebei	Shanxi	Inner Mongolia	Liaoning	Jilin	Heilongjiang	Shanghai	Jiangsu	Zhejiang	Anhui	Fujian	Jiangxi	Shandong	Henan	Hubei	Hunan	Guangdong	Guangxi	Hainan	Chongqing	Sichuan	Guizhou	Yunnan	Tibet	Shaanxi	Gansu	Qinghai	Ningxia	Xinjiang	Total outlow
2016	Beijing	0	52.3462	2634.64	3.04338	0.459732	0.0635495	0.00242181	0.0110013	0.0113441	0.270951	0.00155167	0.000575247	2.57059e-06	0.00313195	89.1983	0.0138414	0.0542244	0.00368564	0.00514738	1.89859e-05	6.02591e-07	0.00109529	7.91808e-05	1.60022e-08	1.79415e-09	1.1711e-07	0.00486529	0.000120232	1.20927e-05	0.000337449	4.04386e-07	2780.14
2016	Tianjin	20716	0	1304.43	1.5068	0.227617	0.0314639	0.00119906	0.00544682	0.00561657	0.13415	0.000768242	0.000284809	1.27272e-06	0.00155065	44.1628	0.006853	0.026847	0.00182479	0.00254851	9.40008e-06	2.98347e-07	0.000542287	3.9203e-05	7.9228e-09	8.88296e-10	5.79819e-08	0.00240884	5.95279e-05	5.98719e-06	0.000167074	2.00215e-07	22066.6
2016	Hebei	115166	33704.5	0	1959.56	296.011	40.918	1.55935	7.08346	7.30422	174.459	0.99908	0.370388	0.00165514	2.01659	57432.7	8.91216	34.9138	2.37309	3.31428	0.0122246	0.000387994	0.705232	0.0509826	1.03034e-05	1.15521e-06	7.54041e-05	3.13264	0.0774146	0.00778619	0.217275	0.000260375	208847
2016	Shanxi	156236	4728.98	238015	0	41.5324	5.74109	0.218787	0.99386	4665.19	111519	625.477	236.759	1.03621	1275.32	8058.7	5690.07	22304.6	1514.08	2117.21	7.79953	0.247856	439.504	20.2209	0.0065659	0.000737047	0.0260524	1125.43	26.6703	2.68245	1.50753	0.0897023	558660
2016	Inner Mongolia	68947.7	16925.5	599119	40406.9	0	307465	11717.2	53226.3	197.773	3633.25	175.175	7.76542	0.290207	203.098	32876.3	266.043	884.257	83.0985	85.2202	0.428069	0.0099765	147.209	146.086	0.000453339	4.0452e-05	0.261259	10348.7	269.125	27.0679	1615.33	0.905169	1.14878e+06
2016	Liaoning	70646.7	14891.6	5159.13	1024.06	202.025	0	89.6132	4.86502	3.81817	91.1723	0.525415	0.193566	0.000870436	1.05731	35689.7	4.65923	18.2494	1.2409	1.73239	0.00639229	0.000202807	0.371383	0.0297381	5.38968e-06	6.04063e-07	4.49475e-05	1.85655	0.0461652	0.00464319	0.14792	0.000155271	127833
2016	Jilin	7378.09	1558.3	1302.72	157.623	2880.99	93817.3	0	194.356	0.648276	14.0792	0.279467	0.0299578	0.000462983	0.370254	3724.79	0.822844	3.02004	0.234892	0.288333	0.00121001	3.37544e-05	0.227612	0.190917	1.13905e-06	1.14344e-07	0.000340584	13.4987	0.350825	0.035285	2.09237	0.00117996	111050
2016	Heilongjiang	1198.77	255.126	692.832	57.5276	2269.45	14776.5	56197.3	0	0.262495	5.15818	0.186872	0.0110039	0.000309585	0.223819	603.609	0.345488	1.19245	0.104488	0.114501	0.000538254	1.34043e-05	0.155918	0.149316	5.47985e-07	5.08644e-08	0.000266904	10.5735	0.274938	0.0276526	1.64815	0.000924722	76071.5
2016	Shanghai	0.000268744	5.53648e-05	0.00278657	0.000714583	4.86243e-07	6.72141e-08	2.56147e-09	1.16357e-08	0	7050.94	11734.9	18.8922	19.4408	0.0289564	0.000102952	0.0151181	0.507987	0.0360258	0.0506549	0.000185582	5.93003e-06	0.109185	1.12991	2.30804e-07	1.75372e-08	3.22499e-05	0.0196111	0.000471161	5.18112e-05	2.61047e-05	1.58469e-06	18826.1
2016	Jiangsu	2.72302e-05	5.60978e-06	0.000282346	7.24044e-05	4.92681e-08	6.8104e-09	2.59538e-10	1.17897e-09	48487.4	0	15100.2	6486.46	25.0159	0.00293397	1.04315e-05	0.00153183	0.0514713	0.00365027	0.00791789	1.88039e-05	9.26927e-07	0.011063	0.114487	2.3386e-08	1.77694e-09	3.26769e-06	0.00198708	4.77399e-05	5.24971e-06	2.64503e-06	1.60567e-07	70099.2
2016	Zhejiang	2.21572e-05	4.56468e-06	0.000229745	5.89155e-05	4.00895e-08	5.54163e-09	2.11186e-10	9.59331e-10	39454.2	2863.59	0	565.143	2761.31	0.00238738	8.48815e-06	0.00124645	0.0418822	0.00297023	0.337713	1.53007e-05	3.95351e-05	0.00900198	0.0931584	1.90292e-08	1.4459e-09	2.65892e-06	0.00161689	3.8846e-05	4.27169e-06	2.15227e-06	1.30654e-07	45644.7
2016	Anhui	3.34116e-06	6.88323e-07	3.4644e-05	8.88406e-06	6.04522e-09	8.3564e-10	3.18455e-11	1.44661e-10	5949.43	122166	170241	0	282.031	0.00036	1.27996e-06	0.000187956	0.00631555	0.000447891	0.0346867	2.30725e-06	4.06068e-06	0.00135744	0.0140477	2.86948e-09	2.18032e-10	4.00947e-07	0.000243816	5.85771e-06	6.44143e-07	3.24547e-07	1.97017e-08	298638
2016	Fujian	2.20443e-07	4.54141e-08	2.28574e-06	5.86152e-07	3.98851e-10	5.51338e-11	2.1011e-12	9.5444e-12	392.531	28.49	16582.9	5.62262	0	2.37521e-05	8.44488e-08	1.24009e-05	0.000416687	2.95509e-05	96.2533	1.52227e-07	0.0112681	8.95609e-05	0.000926835	1.89322e-10	1.43853e-11	2.64536e-08	1.60865e-05	3.86479e-07	4.24992e-08	2.14129e-08	1.29988e-09	17105.8
2016	Jiangxi	0.110901	0.00336194	0.16921	0.889007	2.95263e-05	4.08147e-06	1.55541e-07	7.06557e-07	82.9068	36.3922	2.21426	0.077936	0.00366829	0	0.00573006	18.7053	634.718	43.0143	60.2451	0.221581	0.00705273	12.1035	0.123817	0.000186245	2.09391e-05	3.55204e-06	0.0029474	7.05504e-05	7.58042e-06	3.93005e-06	2.37288e-07	891.915
2016	Shandong	0	0	0	0	0	0	0	0	0	0	0	0	0	0	0	0	0	0	0	0	0	0	0	0	0	0	0	0	0	0	0	0
2016	Henan	2.70291	0.0819383	4.12405	21.6672	0.000719626	9.94751e-05	3.7909e-06	1.72205e-05	2020.64	886.964	53.9669	1.89948	0.089405	872.96	0.139655	0	15469.6	1048.36	1468.31	5.40045	0.171892	294.992	3.01771	0.00453923	0.000510336	8.65717e-05	0.0718352	0.00171948	0.000184753	9.57846e-05	5.78327e-06	22155.2
2016	Hubei	134.394	4.07413	205.055	1077.33	0.0357812	0.00494609	0.000188491	0.000856235	100470	44101.5	2683.34	94.446	4.44539	43405.3	6.94392	22667.8	0	52126.5	73007.4	268.521	8.54678	14667.5	150.046	0.225699	0.0253749	0.00430451	3.57178	0.0854959	0.00918626	0.00476259	0.000287555	355087
2016	Hunan	0.0689496	0.00209025	0.105205	0.552716	1.83577e-05	2.53762e-06	9.67062e-08	4.39296e-07	51.5768	22.6266	1.37766	0.0484564	0.00228232	22.2686	0.00356262	11.6295	394.619	0	31829.4	2942.47	3.72619	7.61328	0.0782693	2.35182	0.278059	2.24519e-06	0.00185485	4.44006e-05	4.77205e-06	2.47319e-06	1.49336e-07	35290.8
2016	Guangdong	0	0	0	0	0	0	0	0	0	0	0	0	0	0	0	0	0	0	0	0	237.502	0	0	0	0	0	0	0	0	0	0	237.502
2016	Guangxi	0.000201037	1.34385e-05	0.000676375	0.00138763	1.18024e-07	1.63147e-08	6.21737e-10	2.82429e-09	4.44882	0.151802	0.139423	0.000368759	0.000230977	0.0559329	2.42404e-05	0.0292096	0.990377	1269.62	24847.9	0	2.90888	12.0426	0.175921	320.458	37.8883	5.02114e-06	0.00305448	7.3384e-05	8.06941e-06	4.06588e-06	2.46818e-07	26496.8
2016	Hainan	0	0	0	0	0	0	0	0	0	0	0	0	0	0	0	0	0	0	518.006	0	0	0	0	0	0	0	0	0	0	0	0	518.006
2016	Chongqing	1.02154	0.164123	8.26051	4.12886	0.00144142	0.00019925	7.59321e-06	3.44928e-05	881.884	744.855	567.238	1.77021	0.939723	166.818	0.303952	87.1075	2941.66	5090.53	551.559	26.2266	0.0645696	0	3186.68	0.256661	0.00247838	0.0909539	55.3109	1.32885	0.146127	0.0736253	0.00446943	14318.4
2016	Sichuan	114.652	33.5172	1686.96	3.07296	0.294366	0.0406906	0.00155068	0.0070441	112379	130042	125663	317.987	208.182	229.535	62.591	117.348	794.739	1071.79	132.138	5.52189	0.0154691	63318.8	0	0.0522428	0.000521812	20.5166	12475.7	299.732	32.9601	16.6067	1.00811	449028
2016	Guizhou	0.0832353	0.0126623	0.637306	0.358084	0.000111207	1.53723e-05	5.85823e-07	2.66115e-06	71.3325	58.5066	43.3033	0.138626	0.071739	14.4627	0.0234258	7.5521	255.187	45546.6	283661	10030.4	33.2074	23759.7	242.653	0	0.94786	0.00692577	4.21174	0.101188	0.0111271	0.00560632	0.000340333	363730
2016	Yunnan	0.136042	0.0397517	2.00074	0.00421905	0.00034912	4.82594e-05	1.83912e-06	8.35436e-06	69169.3	1171.41	1841.93	3.10256	3.05146	0.29537	0.0742331	0.15126	1.35283	66.923	475763	1993.71	55.6963	106.099	852.486	827.249	0	0.0243316	14.7955	0.355465	0.0390888	0.0196946	0.00119556	551873
2016	Tibet	0.230243	0.0673269	3.38864	0.00561737	0.000591301	8.17365e-05	3.1149e-06	1.41497e-05	150.774	174.438	169.373	0.426819	0.280595	0.438705	3.49545	0.309222	1.19981	1.46518	0.19097	0.0075486	2.23564e-05	85.0284	964.18	7.02616e-05	7.13333e-07	0	25.0612	184.997	5602.88	10.2496	0.622214	7379.11
2016	Shaanxi	7480.59	2188.64	110157	146.224	19.2218	2.65707	0.101258	0.459974	3497.07	2835.27	2138.93	6.73147	3.5435	12795.8	4082.3	6517.49	13020.5	2706.77	1337.4	13.9435	0.156566	10510.2	11489.3	0.0190837	0.00131765	18.7712	0	19307.1	1941.86	1069.71	64.937	213352
2016	Gansu	403.891	118.169	5947.56	7.90142	1.03782	0.14346	0.00546711	0.0248348	351.986	230.885	4491.91	1.99641	7.44159	691.133	18014.5	801.852	707.675	146.994	72.6832	0.757222	0.00850883	601.629	1008.14	0.00105968	7.15565e-05	931.4	43988.8	0	98036	54005.6	3278.46	233849
2016	Qinghai	12.5257	3.66472	184.449	0.245284	0.0321855	0.00444905	0.000169549	0.000770191	43.4206	44.7883	175.316	0.153807	0.29044	21.4435	557.215	24.8356	22.1188	4.85688	2.28638	0.0250198	0.000267661	36.9394	239.281	4.79006e-05	2.36434e-06	8693.76	1364.21	30149.6	0	1670.42	101.405	43353.3
2016	Ningxia	24.8987	7.28477	366.65	0.486785	0.0639787	0.00884388	0.000337032	0.001531	1634.9	128.12	68550.3	23.2647	113.565	42.5937	283086	27.6077	43.401	9.02062	4.47157	0.0464685	0.000523475	35.432	43.3428	6.39052e-05	4.39122e-06	12.292	2711.79	12863.3	1293.72	0	43.264	371065
2016	Xinjiang	11.0761	3.12242	157.155	3.82042	0.0274228	0.00379069	0.00014446	0.00065622	346.158	153.957	127.17	0.36922	0.210678	163.73	473.946	266418	2597.84	178.659	246.723	0.920331	0.0288832	65.0112	27.025	0.000784698	8.69702e-05	24.5031	1157.26	25643.6	2579.11	1420.77	0	301800
2016	Total inflow	448476	74475.1	966951	44877	5711.41	416108	68006	53434.1	390314	428179	420971	7773.66	3431.24	59908.9	444806	302671	60132.5	110912	895807	15296.4	342.311	114101	18374.6	1150.63	39.1454	9701.66	73304.1	88746.7	109517	59814.4	3490.7
2015		Beijing	Tianjin	Hebei	Shanxi	Inner Mongolia	Liaoning	Jilin	Heilongjiang	Shanghai	Jiangsu	Zhejiang	Anhui	Fujian	Jiangxi	Shandong	Henan	Hubei	Hunan	Guangdong	Guangxi	Hainan	Chongqing	Sichuan	Guizhou	Yunnan	Tibet	Shaanxi	Gansu	Qinghai	Ningxia	Xinjiang	Total outlow
2015	Beijing	0	24.91	1413.43	1.3813	0.202324	0.0289412	0.0012569	0.00592999	0.00509925	0.127453	0.000549897	7.96236e-05	3.06093e-07	0.0016754	39.9726	0.006483	0.0256294	0.00209175	0.0023639	1.0123e-05	4.73515e-06	0.00038715	7.37746e-05	2.19733e-07	1.01477e-09	7.33192e-08	0.0031142	6.53266e-05	6.17982e-06	0.000183035	1.24594e-07	1480.11
2015	Tianjin	21919.3	0	469.892	0.459209	0.067262	0.00962143	0.000417853	0.00197141	0.00169523	0.0423715	0.000182812	2.64707e-05	1.0176e-07	0.000556981	13.2888	0.00215526	0.00852044	0.000695399	0.000785873	3.36537e-06	1.57419e-06	0.000128707	2.45262e-05	7.30496e-08	3.37359e-10	2.43748e-08	0.00103531	2.17176e-05	2.05447e-06	6.08495e-05	4.14211e-08	22403.1
2015	Hebei	82735.4	25225.2	0	1398.78	204.884	29.3074	1.2728	6.00502	5.16377	129.066	0.556855	0.0806311	0.000309965	1.69659	40478.4	6.56503	25.9537	2.11822	2.39381	0.0102511	0.00479507	0.392049	0.0747081	0.000222513	1.02761e-06	7.42469e-05	3.1536	0.0661531	0.00625801	0.185351	0.000126171	150257
2015	Shanxi	100263	4047.52	229663	0	32.8748	4.70254	0.204229	0.96354	4151.59	103919	443.95	64.9208	0.247119	1348.12	6495.28	5280.49	20879.3	1701.42	1925.63	8.2339	3.85725	300.407	33.9228	0.170432	0.0008254	0.0320556	1416.32	27.7263	2.62295	0.886064	0.0529586	482017
2015	Inner Mongolia	53241.2	14914.6	579807	39671.5	0	287602	12490.4	58929.1	223.664	3734.19	69.7193	2.34113	0.0388083	266.904	25372.8	256.262	966.279	111.095	90.9556	0.539096	0.182194	196.787	320.967	0.112526	5.40413e-05	0.339135	13738.8	312.313	29.5436	1808.5	0.594719	1.09416e+06
2015	Liaoning	50798.3	14278.6	763.233	131.474	609.139	0	434.986	18.144	0.508073	12.1529	0.0682072	0.00759468	3.79666e-05	0.223842	25435.4	0.637679	2.50718	0.214108	0.231786	0.0010366	0.000464293	0.0914802	0.100839	5.2167e-05	1.03913e-07	0.000106146	4.31258	0.0975603	0.00922884	0.548003	0.000185795	92490.9
2015	Jilin	5237.31	1472.04	986.741	75.5553	3214.98	89081	0	320.584	0.402317	7.08928	0.11626	0.0044421	6.47146e-05	0.441293	2620.38	0.466591	1.76978	0.195952	0.166161	0.00095063	0.000332839	0.317901	0.513601	0.000181766	9.52951e-08	0.000542632	21.984	0.499696	0.0472693	2.89185	0.000951542	103046
2015	Heilongjiang	1007.52	283.141	655.477	46.329	2234.93	16631.8	61849.1	0	0.256844	4.35669	0.0783781	0.00273094	4.36281e-05	0.299356	503.057	0.295316	1.11545	0.126861	0.104919	0.000615559	0.000210164	0.219341	0.356849	0.000125419	6.17062e-08	0.000377041	15.2746	0.347217	0.0328454	2.0103	0.000661185	83236.3
2015	Shanghai	0.00248901	0.000178327	0.0101185	0.0246596	1.4484e-06	2.07185e-07	8.99794e-09	4.24518e-08	0	9925.57	10428.7	22.4328	5.80502	1.36506	0.000292241	0.629741	21.4722	1.74823	1.98082	0.00846112	0.0039678	0.372672	1.01409	0.000222802	8.48178e-07	0.000364359	0.0298144	0.000584586	8.35347e-05	1.80631e-05	1.13247e-06	20411.2
2015	Jiangsu	0.561305	0.0226834	1.28709	6.30448	0.000184239	2.63543e-05	1.14455e-06	5.39994e-06	41945.4	0	9946.57	1690.06	5.53662	348.948	0.0364031	160.997	5490.7	446.546	506.339	2.16099	1.01425	74.0248	0.312015	0.0419739	0.000216626	0.000112217	0.017086	0.000334838	4.03573e-05	1.05102e-05	5.57044e-06	60626.9
2015	Zhejiang	0.000764412	5.71197e-05	0.00324106	0.00747356	4.63937e-07	6.63634e-08	2.88213e-09	1.35977e-08	31013.1	3165.92	0	161.388	806.399	0.413712	9.3711e-05	0.190855	6.5074	0.529889	0.67884	0.00256459	0.00135979	0.115797	0.342093	6.95358e-05	2.57085e-07	0.000122913	0.0100565	0.000197184	2.81777e-05	6.09274e-06	3.81328e-07	35155.6
2015	Anhui	0.0179605	0.000728621	0.0413431	0.20161	5.918e-06	8.46534e-07	3.67645e-08	1.73453e-07	4651.96	86627	155211	0	86.3962	11.1589	0.00116953	5.14849	175.586	14.2801	16.2005	0.069106	0.0324514	2.37022	0.0465148	0.00134439	6.92748e-06	1.67161e-05	0.00161946	3.1748e-05	4.2982e-06	9.86206e-07	2.18201e-07	246802
2015	Fujian	7.57332e-06	5.65906e-07	3.21104e-05	7.40433e-05	4.5964e-09	6.57487e-10	2.85543e-11	1.34718e-10	307.259	31.3659	14352.8	1.59893	0	0.0040988	9.2843e-07	0.00189087	0.0644713	0.00524981	81.281	2.54084e-05	0.162815	0.00114725	0.00338925	6.88917e-07	2.54704e-09	1.21774e-06	9.96338e-05	1.95357e-06	2.79167e-07	6.03631e-08	3.77796e-09	14774.6
2015	Jiangxi	0.00766205	0.000309542	0.0175639	0.0860629	2.51416e-06	3.59636e-07	1.56188e-08	7.36886e-08	9.26631	4.19463	0.221706	0.00293856	0.00012341	0	0.000496756	2.19778	74.9539	6.09583	6.91206	0.0294997	0.0138456	1.01042	0.00300791	0.000572916	2.95718e-06	1.08225e-06	0.000196488	3.85023e-06	4.47905e-07	1.21209e-07	7.46702e-08	105.015
2015	Shandong	0	0	0	0	0	0	0	0	0	0	0	0	0	0	0	0	0	0	0	0	0	0	0	0	0	0	0	0	0	0	0	0
2015	Henan	1.52551	0.0616297	3.49697	17.1351	0.000500568	7.16033e-05	3.10969e-06	1.46714e-05	1844.91	835.148	44.1416	0.585066	0.0245708	948.411	0.098911	0	14923.3	1213.68	1376.19	5.87338	2.75665	201.173	0.598874	0.114067	0.000588772	0.000215952	0.0391606	0.00143198	0.000152103	4.46914e-05	0.0458353	21419.3
2015	Hubei	69.2992	2.79964	158.856	778.393	0.0227393	0.00325271	0.000141264	0.000666474	83808.9	37938.2	2005.22	26.5778	1.11618	43083.4	4.4929	19877.7	0	55133.6	62515.9	266.81	125.226	9138.67	27.205	5.18173	0.0267461	0.00978837	1.77713	0.0348233	0.00405107	0.00109627	0.000675352	314970
2015	Hunan	0.00223949	9.05023e-05	0.00513525	0.0251535	7.35078e-07	1.05148e-07	4.56654e-09	2.15447e-08	2.76999	1.22735	0.0662437	0.000861881	3.68736e-05	1.39223	0.000145241	0.642343	21.9067	0	28589.7	2508.56	57.2684	0.318637	0.00124937	1.51946	0.251468	4.49337e-07	6.83015e-05	1.33852e-06	1.61387e-07	4.20135e-08	2.22298e-08	31185.7
2015	Guangdong	0	0	0	0	0	0	0	0	0	0	0	0	0	0	0	0	0	0	0	0	3865.47	0	0	0	0	0	0	0	0	0	0	3865.47
2015	Guangxi	2.68583e-05	5.48844e-06	0.000311423	0.00011496	4.45782e-08	6.37664e-09	2.76934e-10	1.30656e-09	9.57702	0.220586	0.2243	0.000473294	0.000124853	0.00637253	9.15107e-06	0.00293633	0.0998752	1364.67	33097.8	0	66.2985	3.61529	0.0573721	235.406	38.9633	2.06136e-05	0.00168514	3.30414e-05	4.723e-06	1.02091e-06	6.3008e-08	34816.9
2015	Hainan	0	0	0	0	0	0	0	0	0	0	0	0	0	0	0	0	0	0	256.228	0	0	0	0	0	0	0	0	0	0	0	0	256.228
2015	Chongqing	0.641346	0.0972713	5.51933	4.17782	0.000790056	0.000113013	4.90809e-06	2.31561e-05	591.492	380.737	166.009	0.274564	0.0924068	231.394	0.161663	106.698	3634.56	7415.61	818.639	38.368	1.63982	0	929.855	172.915	0.00384616	0.334093	27.3147	0.535574	0.076553	0.0165482	0.00102312	14527.2
2015	Sichuan	188.262	57.3669	3255.09	4.54985	0.465945	0.0666507	0.0028946	0.0136566	99277.6	123726	108268	92.1417	60.2656	360.025	95.9411	123.04	1183.83	1340.94	197.542	7.02851	0.395698	53260.3	0	37.5528	0.000704567	232.931	19040.3	373.333	53.3664	11.5352	0.71091	411248
2015	Guizhou	0.0178253	0.00268136	0.152145	0.117057	2.17785e-05	3.11529e-06	1.35295e-07	6.38315e-07	16.7022	10.5772	4.57281	0.00763216	0.00254539	6.48326	0.00445591	2.98953	101.837	46421.7	299130	8349.88	599.191	8649.52	25.5553	0	0.837027	0.00918192	0.750696	0.0147193	0.00210392	0.000454797	2.81203e-05	363321
2015	Yunnan	0.18241	0.0554218	3.14472	0.0112749	0.000450147	6.43908e-05	2.79646e-06	1.31935e-05	128188	2855.05	2978.8	6.27173	1.65811	0.728535	0.0926863	0.294541	7.1362	41.7961	265183	1651.16	531.19	57.9056	626.038	417.028	0	0.224933	18.3865	0.360514	0.0515339	0.0111391	0.000686505	402569
2015	Tibet	0.0672061	0.0204836	1.16227	0.00142664	0.000166372	2.37985e-05	1.03355e-06	4.87626e-06	15.6105	19.4485	17.0156	0.0144836	0.00947151	0.117597	0.694306	0.052637	0.250277	0.224809	0.0374687	0.00117301	7.50539e-05	8.41494	101.887	0.00592632	1.17587e-07	0	6.79881	63.5555	2182.85	1.96366	0.121023	2420.33
2015	Shaanxi	6185.44	1885.58	106991	116.999	15.3151	2.19073	0.0951422	0.448876	3540.71	3388.89	2472.62	2.49661	1.37635	10032.2	3153.27	3212.96	10557.2	2339.57	1057.73	11.3889	2.11874	8513.5	14619.6	4.8703	0.00114167	14.032	0	12251.9	1159.04	378.556	23.3303	191934
2015	Gansu	584.444	178.163	10109.3	11.0578	1.44708	0.206995	0.0089897	0.0424129	389.185	388.102	292.953	0.286456	0.163068	948.079	10543.6	517.232	1000.12	221.928	100.229	1.08061	0.200769	833.501	1736.55	0.480703	0.000108325	707.379	59136.6	0	93209.3	30453	1876.86	213241
2015	Qinghai	13.8048	4.20827	238.784	0.261223	0.0341804	0.0048893	0.00021234	0.00100181	12.5504	13.3528	10.5829	0.00988339	0.00589082	22.3958	248.932	12.2157	23.6524	5.285	2.37303	0.0257506	0.00475344	21.4821	62.9533	0.0126208	2.58134e-06	6065.75	1396.83	23270.3	0	718.977	44.3117	32189.1
2015	Ningxia	93.2307	28.4207	1612.63	1.76353	0.230838	0.03302	0.00143404	0.00676573	54.367	52.3213	38.3539	0.0385552	0.0213492	151.215	251837	52.3356	159.172	35.2793	15.948	0.171743	0.0319455	128.853	226.852	0.0737834	1.72163e-05	13.126	9433.49	18191.9	1720.37	0	34.6414	283882
2015	Xinjiang	15.2859	4.60597	261.35	2.57174	0.0374106	0.00535136	0.000232407	0.00109648	256.215	121.452	13.45	0.0854593	0.00748675	151.016	272.107	199611	2017.06	167.671	186.215	0.811587	0.373008	48.3527	44.894	0.0276255	8.13568e-05	18.2549	1526.11	25435.7	2405.39	785.881	0	233346
2015	Total inflow	322354	62407.4	936400	42269.2	6314.64	393352	74776.1	59275.3	400317	377291	306766	2071.63	969.167	57916.5	367115	229231	61276.4	117986	695161	12852.2	5257.44	81441.7	18759.7	875.516	40.0862	7052.42	105788	79928.8	100763	34164.9	1980.68

## Sheet: Table S9
Table S9	Zn transfer embodied in the provincial electricity transmission for the years from 2015 to 2019 (kg)
2019		Beijing	Tianjin	Hebei	Shanxi	Inner Mongolia	Liaoning	Jilin	Heilongjiang	Shanghai	Jiangsu	Zhejiang	Anhui	Fujian	Jiangxi	Shandong	Henan	Hubei	Hunan	Guangdong	Guangxi	Hainan	Chongqing	Sichuan	Guizhou	Yunnan	Tibet	Shaanxi	Gansu	Qinghai	Ningxia	Xinjiang	Total outlow
2019	Beijing	0	12.5414	168.168	2.79818	0.0979288	0.0128234	0.000507552	0.00192513	0.0148226	0.510939	0.00157063	0.000911257	4.04593e-07	0.00214141	0.121261	0.00141162	0.0348465	0.00114018	0.00257709	1.15023e-05	1.4508e-07	0.000356428	0.000143826	4.52738e-08	6.65602e-12	5.24535e-08	0.00420277	1.17459e-05	4.83167e-07	3.58713e-05	6.27738e-08	184.317
2019	Tianjin	32491.1	0	1846.02	30.7165	1.07499	0.140766	0.00557154	0.0211327	0.162712	5.60872	0.0172412	0.0100031	4.44133e-06	0.0235069	1.33112	0.0154957	0.382519	0.0125161	0.0282894	0.000126264	1.59258e-06	0.00391261	0.00157882	4.96983e-07	7.30649e-11	5.75796e-07	0.046135	0.000128938	5.30386e-06	0.000393769	6.89085e-07	34376.7
2019	Hebei	85752.1	243425	0	54312.1	1900.78	248.9	9.85147	37.3664	287.703	9917.2	30.4855	17.6873	0.00785306	41.5643	2353.65	27.3992	676.362	22.1306	50.0206	0.223256	0.00281596	6.91819	2.79163	0.000878753	1.29192e-07	0.00101811	81.5748	0.227985	0.00937815	0.696254	0.00121842	399203
2019	Shanxi	218259	23058.7	299910	0	1022.23	133.858	5.29809	20.0955	9219.54	317451	967.581	566.172	0.249249	1335.26	69589	877.011	21753.2	710.276	1608.72	7.16548	0.0905643	220.164	83.7975	0.0278104	4.14645e-06	0.0304844	2446.59	6.68947	0.275171	1.19071	0.0357507	969253
2019	Inner Mongolia	66515.6	130229	835048	69614.1	0	529034	20939.2	79421.9	2635.84	114325	906.505	203.918	0.233516	157.779	413459	318.658	894.495	129.379	69.5153	1.29622	0.00391343	166.302	405.834	0.0315332	7.50082e-07	0.153152	11998.2	43.4908	1.78899	1425.05	0.232429	2.27794e+06
2019	Liaoning	80751.9	1302.66	8563.52	41361.1	916.433	0	37.2145	18.0165	218.8	7539.03	23.102	13.4458	0.00595106	31.6393	53081.4	20.8284	515.076	16.8402	38.0922	0.169887	0.00214444	5.2478	2.07304	0.00066521	9.83084e-08	0.000755362	60.5584	0.167939	0.00690815	0.342901	0.000897517	194518
2019	Jilin	10793	2720.47	17468.7	6228.95	79759.1	191587	0	1588.22	77.6574	3139.16	20.5846	5.59908	0.00530259	6.82565	14384.1	8.72806	78.1139	4.52807	5.84319	0.0455029	0.000328948	3.89488	8.24456	0.000699794	2.63312e-08	0.00310814	243.66	0.877155	0.0360818	28.1356	0.0046878	328162
2019	Heilongjiang	2248.89	1819.29	11669	1642.58	55788.5	32726.6	117520	0	39.9933	1702.49	12.895	3.03666	0.00332175	2.6995	6582.5	4.7423	20.836	2.06358	1.58735	0.0206937	8.93613e-05	2.38228	5.63671	0.000446278	1.19748e-08	0.00212672	166.634	0.60316	0.024811	19.6785	0.00322348	231983
2019	Shanghai	5.49828e-05	7.10937e-06	9.49821e-05	1.58093e-06	9.13021e-08	1.19557e-08	4.73207e-10	1.79486e-09	0	15480.9	3332.85	27.6775	0.858543	0.0898843	2.78622e-05	0.0560318	1.48775	0.0472326	0.110056	0.000476628	6.19573e-06	0.0205309	0.066543	4.51294e-06	2.7581e-10	2.1568e-05	0.00105992	2.94209e-06	1.21023e-07	3.65736e-07	1.57234e-08	18844.2
2019	Jiangsu	1.73744e-05	2.24654e-06	3.0014e-05	4.99568e-07	2.88189e-08	3.77373e-09	1.49364e-10	5.66535e-10	56828.5	0	7621.34	4681.43	1.96325	0.023179	8.80427e-06	0.0144504	0.383648	0.0121825	0.0285356	0.000122941	1.60644e-06	0.0057415	0.0210274	1.34055e-06	7.1142e-11	6.81541e-06	0.000334933	9.27048e-07	3.81341e-08	1.15243e-07	4.95444e-09	69133.7
2019	Zhejiang	0.000575202	7.43745e-05	0.000993653	1.65388e-05	9.49453e-07	1.24327e-07	4.92089e-09	1.86648e-08	45701.5	6764.76	0	36.5563	307.418	0.0188651	0.000291463	0.0119596	0.310698	0.0103148	0.0503673	0.000105223	2.83548e-06	0.083164	0.696143	3.2127e-05	6.08896e-11	0.000225634	0.0110884	3.03124e-05	1.2469e-06	3.76819e-06	1.61999e-07	52811.4
2019	Anhui	9.62926e-05	1.24508e-05	0.000166344	2.7687e-06	1.58951e-07	2.08141e-08	8.23824e-10	3.12474e-09	10326	127767	198410	0	51.1105	0.00424898	4.87928e-05	0.00268189	0.0700702	0.0022995	0.00973519	2.33933e-05	5.48052e-07	0.014078	0.116539	5.39612e-06	1.3537e-11	3.77726e-05	0.00185627	5.07505e-06	2.08762e-07	6.30889e-07	2.71227e-08	336555
2019	Fujian	2.76898e-05	3.58033e-06	4.78337e-05	7.96164e-07	4.5706e-08	5.98504e-09	2.36888e-10	8.98512e-10	2200.03	325.65	57449.1	1.75979	0	0.000908152	1.40308e-05	0.000575726	0.0149568	0.000502946	74.7552	0.00303464	0.00420842	0.00400348	0.0335118	2.22278e-06	1.75605e-09	1.08618e-05	0.000533786	1.45922e-06	6.00251e-08	1.81399e-07	7.79855e-09	60051.3
2019	Jiangxi	3.81026e-06	4.93831e-07	6.58846e-06	1.1015e-07	4.17233e-08	5.46351e-09	2.16246e-10	8.20216e-10	10.2967	5.24654	0.167955	0.00936028	4.32651e-05	0	2.0372e-06	3.56729	94.7612	3.00564	7.00492	0.0303298	0.000394348	0.818215	0.00459053	9.39279e-05	1.75509e-08	1.48932e-06	7.34403e-05	3.09701e-06	1.27395e-07	3.84976e-07	1.65514e-08	124.913
2019	Shandong	489.459	2893.74	297.667	4.95296	0.17334	0.0226982	0.000898398	0.0034076	0.0262369	0.904393	0.0027801	0.00161298	7.16154e-07	0.00379043	0	0.00249865	0.0616803	0.00201819	0.0045616	2.03597e-05	2.568e-07	0.0006309	0.000254581	8.01373e-08	1.17815e-11	9.28458e-08	0.00743916	2.07909e-05	8.55234e-07	6.34944e-05	1.11113e-07	3687.04
2019	Henan	0.000241768	3.13345e-05	0.00041805	6.98921e-06	2.64742e-06	3.4667e-07	1.37212e-08	5.20443e-08	653.346	332.903	10.657	0.593927	0.00274525	363.231	0.000129264	0	6012.78	190.714	444.475	1.92448	0.0250222	51.9173	0.291278	0.0059599	1.11364e-06	9.45004e-05	0.00465992	0.000196511	8.08348e-06	2.44274e-05	1.05022e-06	8062.87
2019	Hubei	0.0334526	0.00433565	0.0578442	0.000967073	0.000366315	4.79676e-05	1.89856e-06	7.20119e-06	90401.3	46062.7	1474.58	82.1797	0.379851	50259.1	0.0178859	31319.5	0	26388.4	61500.5	266.284	3.46223	7183.62	40.3031	0.824652	0.000154091	0.0130757	0.644778	0.0271906	0.00111848	0.00337994	0.000145315	314984
2019	Hunan	0.00466305	0.000912415	0.00973649	0.000292493	0.00946565	0.00123949	4.90592e-05	0.00018608	158.432	80.7269	2.62007	0.144186	0.000674931	88.0808	0.0307881	54.8907	1458.04	0	26964.9	8020.67	1.51802	12.6594	0.0752538	1.79158	0.00464132	0.00040885	0.0868351	0.773298	0.0318096	0.096125	0.00413275	36845.6
2019	Guangdong	2.46875e-09	3.57281e-10	4.47153e-09	9.04704e-11	1.16747e-09	1.52876e-10	6.05087e-12	2.29508e-11	2.3252e-05	1.10265e-05	6.64918e-07	1.96984e-08	1.71283e-10	1.1495e-05	4.74747e-09	7.16418e-06	0.000190277	0.0986819	0	46.7084	64.8811	0.000401573	2.30289e-06	0.0104255	2.70287e-05	7.93705e-10	4.72151e-08	9.52213e-08	3.91693e-09	1.18365e-08	5.08893e-10	111.699
2019	Guangxi	3.35997e-05	4.86259e-06	6.08574e-05	1.2313e-06	1.58893e-05	2.08065e-06	8.23522e-08	3.1236e-07	0.316459	0.15007	0.00904952	0.000268095	2.33115e-06	0.156447	6.4613e-05	0.0975044	2.58967	1343.06	35573.6	0	2.00265	5.4654	0.0313423	141.891	0.367861	1.08023e-05	0.000642597	0.00129596	5.33093e-05	0.000161095	6.92603e-06	37069.7
2019	Hainan	4.28651e-13	6.20348e-14	7.76393e-13	1.57084e-14	2.02709e-13	2.6544e-14	1.05061e-15	3.98495e-15	4.03725e-09	1.91453e-09	1.1545e-10	3.42025e-12	2.97399e-14	1.99588e-09	8.24305e-13	1.24392e-09	3.30378e-08	1.71342e-05	200.109	0.00810999	0	6.97252e-08	3.99852e-10	1.81018e-06	4.69301e-09	1.37811e-13	8.19798e-12	1.65333e-11	6.80097e-13	2.05518e-12	8.83593e-14	200.117
2019	Chongqing	0.737949	0.0954181	1.2748	0.0212184	0.00122813	0.000160819	6.36523e-06	2.41432e-05	574.009	369.009	119.944	0.66057	0.0308975	263.086	0.373959	164.206	4352.97	864.918	352.205	8.69796	0.0198277	0	893.102	16.9704	5.03325e-06	0.289473	14.2257	0.0397096	0.00163345	0.00493637	0.000212221	7996.89
2019	Sichuan	538.926	69.6838	930.985	15.4957	0.889464	0.116472	0.00460998	0.0174855	74017.1	93618.3	81984.4	168.65	21.1192	215.608	273.081	325.137	2082.1	497.078	179.05	5.04229	0.0100798	75425.1	0	29.8147	2.91782e-06	211.404	10389.1	28.3918	1.1679	3.52944	0.151735	341031
2019	Guizhou	0.108353	0.0140247	0.187257	0.00312287	0.00062019	8.12116e-05	3.21436e-06	1.2192e-05	91.4816	57.8276	17.698	0.103503	0.004559	42.648	0.0562305	26.615	705.678	37437.1	219753	1730.39	12.3712	23343.1	130.875	0	0.00100133	0.0424373	2.08862	0.0417831	0.00171875	0.00519389	0.000223302	283351
2019	Yunnan	1.8853	0.243772	3.25682	0.0542079	0.00311174	0.000407471	1.61277e-05	6.11721e-05	104035	7617.28	1856.2	13.623	0.478156	0.798239	0.955305	1.16482	8.01185	16.1175	970198	6794.81	54.6182	263.921	2281.7	1.6346	0	0.739543	36.3436	0.0993357	0.00408617	0.0123486	0.000530881	1.09319e+06
2019	Tibet	328.779	42.5115	567.96	9.45336	0.542627	0.071055	0.00281236	0.0106672	630.628	798.11	697.568	1.4413	0.179694	56.7116	166.596	151.727	31.6235	56.4254	4.28639	0.564802	0.000241306	699.33	5543.17	0.259704	3.26834e-07	0	6337.98	17.3206	0.712481	2.15315	0.0925666	16146.2
2019	Shaanxi	56499.8	7305.5	97602.6	1624.54	93.2491	12.2106	0.483298	1.83314	4455.29	5718.45	4770.83	10.9167	1.22897	9571.13	28629.2	25965.1	2543.65	9120.51	491.672	91.1987	0.0276791	14417.1	36834.8	2.78416	5.27739e-05	13.4179	0	2976.5	122.438	370.014	15.9074	309262
2019	Gansu	9646.23	1895.63	20185.7	609.243	19830.5	2596.73	102.779	389.838	3935.25	2383.79	74988.1	343.437	19.3169	1602.58	64439.3	5541.46	829.222	217163	7331.14	2171.16	0.412714	2701.91	8858.22	1.0679	0.00125638	808.32	179551	0	66641.4	201383	8658.16	904608
2019	Qinghai	1489.37	288.488	3093.87	91.9191	2933.61	384.145	15.2045	57.6703	702.275	508.653	11232.3	88.3363	2.89343	247.866	9564.06	986.03	129.208	32135.4	1085.34	321.284	0.0611003	532.455	2362.7	0.207275	0.000185917	13934.7	27763.9	239658	0	29790.7	2236	381636
2019	Ningxia	2370.97	4188.75	25184.6	2055.4	118648	15536.5	614.936	2332.44	17026.8	5901.28	441853	21.4889	113.821	66.4278	357778	183.677	45.0487	1271.4	45.8651	12.7113	0.00258202	99.6006	265.052	0.0222844	7.35568e-06	4.60952	7367.9	9098.74	374.276	0	48.6266	1.01251e+06
2019	Xinjiang	506.106	99.4574	1059.08	31.9649	1040.44	136.242	5.39247	20.4535	1664.32	15755.6	28049.8	129145	7.22562	196.924	3380.92	476771	1911.45	11453.1	522.723	114.511	0.0294272	157.891	464.866	0.0578811	6.62642e-05	42.4099	9420.44	84999.6	3496.45	10565.9	0	781019
2019	Total inflow	568684	419352	1.3236e+06	177635	281935	772396	139250	83887.9	425891	783629	915833	135434	528.537	64550.3	1.02368e+06	542752	44148	338826	1.3265e+06	19594.9	139.547	125300	58184.5	197.404	0.375268	15016.1	255881	336831	70638.7	243590	10959.2
2018		Beijing	Tianjin	Hebei	Shanxi	Inner Mongolia	Liaoning	Jilin	Heilongjiang	Shanghai	Jiangsu	Zhejiang	Anhui	Fujian	Jiangxi	Shandong	Henan	Hubei	Hunan	Guangdong	Guangxi	Hainan	Chongqing	Sichuan	Guizhou	Yunnan	Tibet	Shaanxi	Gansu	Qinghai	Ningxia	Xinjiang	Total outlow
2018	Beijing	0	9.95264	237.033	2.13998	0.131575	0.0175851	0.00111918	0.00254275	0.0088084	0.338868	0.00133271	0.000693659	3.75599e-07	0.00166912	0.0859541	0.0012627	0.0264028	0.00113786	0.00221085	4.62259e-06	1.54578e-07	0.000232797	0.000110974	1.22965e-08	8.30552e-12	2.20139e-08	0.00293273	1.92966e-05	1.04138e-06	6.71617e-05	3.5787e-08	249.75
2018	Tianjin	26401.4	0	665.895	6.01183	0.369633	0.0494018	0.00314411	0.00714336	0.0247454	0.951982	0.00374399	0.0019487	1.05517e-06	0.00468906	0.241471	0.0035473	0.0741733	0.0031966	0.00621095	1.29862e-05	4.34257e-07	0.000653998	0.000311758	3.45445e-08	2.33327e-11	6.18436e-08	0.00823893	5.42101e-05	2.92555e-06	0.000188677	1.00536e-07	27075.1
2018	Hebei	175163	116181	0	24980.8	1535.93	205.278	13.0646	29.6826	102.824	3955.74	15.5573	8.09736	0.00438451	19.4843	1003.38	14.74	308.21	13.2827	25.8082	0.0539613	0.00180445	2.71754	1.29544	0.000143542	9.69536e-08	0.000256977	34.235	0.225257	0.0121564	0.784005	0.000417756	323615
2018	Shanxi	184574	11591.1	270009	0	490.664	65.5776	4.1736	9.48234	6531.19	250953	969.012	513.695	0.273097	1237.53	58818.4	929.338	19632.9	842.369	1643.83	3.42277	0.114933	167.633	68.9527	0.00876765	6.14978e-06	0.0132602	1818.07	11.3785	0.614065	1.19497	0.0211023	810887
2018	Inner Mongolia	101955	121716	860149	56201.1	0	507914	32325.6	73443.1	972.031	49421.4	894.251	101.31	0.252027	187.104	201147	409.196	733.196	177.288	66.8866	0.695672	0.00467658	219.91	532.18	0.015002	1.24993e-06	0.121872	14226.6	116.38	6.28065	1903.01	0.215835	2.02482e+06
2018	Liaoning	74181.9	25305.1	1742.69	26.8023	869.348	0	117.094	16.8101	0.279595	13.5047	0.213057	0.027677	6.0046e-05	0.0536464	76848.1	0.10175	0.339778	0.047938	0.0297066	0.000189135	2.07703e-06	0.0517748	0.122344	3.50863e-06	3.39823e-10	2.79952e-05	3.27036	0.0267223	0.00144212	0.435335	4.95585e-05	179126
2018	Jilin	10310.5	4775.14	12654.4	816.452	55096.1	169667	0	1127.06	14.0991	716.762	12.9657	1.4693	0.00365412	2.71388	12063.4	5.9334	10.6502	2.57117	0.971422	0.0100893	6.79199e-05	3.18838	7.7155	0.000217505	1.81276e-08	0.00176689	206.257	1.68726	0.091056	27.5894	0.00312915	267524
2018	Heilongjiang	1920.1	1277.89	6190.9	403.11	27243.1	25494.1	97018.4	0	6.96907	354.32	6.41071	0.726325	0.00180673	1.34146	2673.57	2.93352	5.25878	1.27104	0.479718	0.00498751	3.35409e-05	1.57648	3.81502	0.000107545	8.96118e-09	0.000873662	101.986	0.83429	0.0450239	13.642	0.00154725	162723
2018	Shanghai	4.8192e-05	3.1904e-05	0.000759806	7.7338e-06	4.48419e-07	5.99315e-08	3.81426e-09	8.66593e-09	0	15612.4	4145.2	32.7842	1.16824	0.0257171	1.20428e-06	0.0186988	0.413095	0.0176004	0.0346392	7.15521e-05	2.4219e-06	0.0279755	0.21089	3.33118e-06	1.2856e-10	1.67837e-05	0.00591309	3.70372e-05	2.02921e-06	3.11299e-06	6.87125e-08	19792.3
2018	Jiangsu	1.12193e-05	7.43105e-06	0.000176974	1.74881e-06	1.04433e-07	1.39575e-08	8.88308e-10	2.01822e-09	37684.5	0	8571.96	4823.39	2.41584	0.00444717	2.78509e-07	0.00324035	0.0713781	0.00305681	0.00609009	1.24343e-05	4.25807e-07	0.0063391	0.0491228	7.67246e-07	2.2341e-11	3.90944e-06	0.00137735	8.62458e-06	4.7253e-07	7.24902e-07	1.60006e-08	51082.4
2018	Zhejiang	0.0004023	0.000266826	0.00635461	5.75483e-05	3.7486e-06	5.01003e-07	3.18857e-08	7.24437e-08	40759.9	6450.99	0	229.005	300.8	0.00562809	9.80152e-06	0.0050198	0.0826873	0.00564916	0.0211651	2.39461e-05	1.47982e-06	0.20995	1.7641	2.66857e-05	4.30245e-11	0.000140396	0.0494633	0.000309473	1.69559e-05	2.60116e-05	5.74145e-07	47742.8
2018	Anhui	6.21358e-05	4.12112e-05	0.000981465	8.89592e-06	5.78971e-07	7.73798e-08	4.92474e-09	1.11889e-08	8199.42	123747	163743	0	46.1478	0.00109277	1.51413e-06	0.000936833	0.0163696	0.00102356	0.0035555	4.31149e-06	2.48594e-07	0.0324523	0.272464	4.12284e-06	7.74657e-12	2.16841e-05	0.00763957	4.77983e-05	2.61884e-06	4.0175e-06	8.86769e-08	295736
2018	Fujian	1.68143e-05	1.11521e-05	0.000265594	2.40526e-06	1.56675e-07	2.09397e-08	1.33268e-09	3.02782e-09	1703.58	269.622	44608.7	9.57139	0	0.000235229	4.0966e-07	0.000209805	0.00345596	0.000240269	33.999	0.00301536	0.00237714	0.008775	0.0737316	1.8313e-06	5.41777e-09	5.86793e-06	0.00206735	1.29346e-05	7.0868e-07	1.08717e-06	2.39967e-08	46625.6
2018	Jiangxi	2.05508e-05	1.8234e-06	4.2778e-05	0.000169661	6.63436e-08	8.86686e-09	5.6432e-10	1.28212e-09	10.2902	3.75352	0.206011	0.00772209	5.80602e-05	0	6.48443e-06	3.59214	80.027	3.35921	6.69773	0.0136619	0.000468292	0.571477	0.00385447	2.80594e-05	2.45468e-08	3.12351e-07	0.000109253	8.85522e-06	4.78438e-07	7.40111e-07	1.64231e-08	108.523
2018	Shandong	383.037	602.048	4825.2	43.5629	2.67843	0.357975	0.0227828	0.0517621	0.17931	6.89824	0.0271296	0.0141206	7.64596e-06	0.0339778	0	0.0257044	0.537474	0.0231632	0.0450057	9.41007e-05	3.14671e-06	0.00473899	0.00225906	2.50316e-07	1.69073e-10	4.4813e-07	0.0597008	0.000392816	2.11991e-05	0.00136719	7.28506e-07	5864.82
2018	Henan	0.00196737	0.000435877	0.010333	0.012552	9.11949e-06	1.21883e-06	7.75707e-08	1.76239e-07	757.364	276.262	15.1628	0.568351	0.00427334	365.844	0.000488279	0	5890.03	247.24	492.957	1.00553	0.0344666	42.0619	0.285783	0.00206524	1.80666e-06	2.33946e-05	0.0639646	0.00100158	5.40927e-05	8.36986e-05	1.85754e-06	8088.91
2018	Hubei	0.183025	0.0162392	0.38098	1.511	0.000590854	7.8968e-05	5.02582e-06	1.14186e-05	91644.2	33428.8	1834.73	68.7727	0.517083	44268.6	0.0577502	31991.5	0	29917	59649.8	121.673	4.1706	5089.56	34.3278	0.249896	0.000218613	0.00278179	0.973005	0.0788644	0.00426096	0.00659141	0.000146264	298057
2018	Hunan	0.00139181	0.000914843	0.0210503	0.00062181	0.00114821	0.000153459	9.76669e-06	2.21897e-05	25.3692	9.25421	0.554074	0.0190883	0.000156155	12.2547	0.0385129	8.85954	197.273	0	24770.1	2559.05	1.73187	1.43123	0.0162596	0.607879	0.00459791	0.0010953	0.160807	1.59986	0.086338	0.133647	0.00296705	27588.5
2018	Guangdong	1.34882e-09	8.9042e-10	2.10692e-08	3.0869e-10	2.22718e-10	2.97664e-11	1.89445e-12	4.30414e-12	2.19304e-05	4.36859e-06	1.02084e-06	9.15288e-09	2.87703e-10	3.40154e-06	7.1582e-09	2.46139e-06	5.47381e-05	0.121684	0	88.1936	69.5482	0.000689505	4.76831e-06	0.0209475	0.00015846	5.82032e-10	1.63385e-07	2.97035e-07	1.60305e-08	2.48138e-08	5.50874e-10	157.885
2018	Guangxi	6.93144e-06	4.57578e-06	0.000108272	1.58633e-06	1.14453e-06	1.52967e-07	9.73537e-09	2.21186e-08	0.112698	0.0224498	0.00524599	4.70357e-05	1.47848e-06	0.0174802	3.67853e-05	0.0126489	0.281294	625.324	31179.3	0	2.17999	3.5433	0.0245039	107.647	0.814309	2.991e-06	0.000839621	0.00152644	8.23792e-05	0.000127516	2.83089e-06	31919.3
2018	Hainan	3.54382e-13	2.33944e-13	5.53561e-12	8.11036e-14	5.85159e-14	7.82068e-15	4.97738e-16	1.13085e-15	5.76188e-09	1.14778e-09	2.6821e-10	2.40478e-12	7.55898e-14	8.93703e-10	1.88071e-12	6.46695e-10	1.43816e-08	3.19708e-05	261.345	0.0231715	0	1.81157e-07	1.2528e-09	5.50364e-06	4.16329e-08	1.5292e-13	4.2927e-11	7.80416e-11	4.21178e-12	6.51946e-12	1.44734e-13	261.368
2018	Chongqing	0.202381	0.133724	3.18467	0.0360974	0.00188223	0.000251562	1.60103e-05	3.63751e-05	553.9	306.945	120.118	0.652359	0.0338529	215.902	0.00524914	156.503	3472.03	1204.02	332.343	4.73326	0.0232368	0	883.743	5.70529	8.50436e-06	0.0703347	24.7794	0.157957	0.00865199	0.013275	0.000293046	7285.25
2018	Sichuan	120.512	79.9333	1903.65	17.191	1.12296	0.150084	0.00955191	0.0217018	64486.4	86264.2	66502.3	189.962	18.7424	252.665	2.93439	467.954	1694.02	723.662	169.015	2.85805	0.0118172	62730.5	0	7.98611	5.13513e-06	42.0588	14817.8	92.7071	5.07938	7.79214	0.171993	300601
2018	Guizhou	0.0277822	0.0183569	0.437142	0.00497237	0.0003102	4.14585e-05	2.63857e-06	5.99478e-06	77.0219	42.4623	16.477	0.0902201	0.00464372	30.1299	0.00247668	21.8394	484.542	30162.1	183295	2041.81	12.8156	17992.5	121.041	0	0.00366857	0.00968323	3.40119	0.0946523	0.00512549	0.00791787	0.000175553	234301
2018	Yunnan	0.196562	0.130376	3.10497	0.0280412	0.00183169	0.000244807	1.55804e-05	3.53984e-05	95934.7	6996.77	1928.78	14.7067	0.54359	0.463329	0.00478899	0.800273	3.58764	48.3475	872831	5275.32	61.0266	126.133	861.973	724.379	0	0.0686002	24.1687	0.151325	0.00829094	0.012719	0.000280744	984836
2018	Tibet	29.8488	19.807	471.402	4.26231	0.761647	0.101795	0.00647859	0.0147192	136.75	181.458	158.905	0.405355	0.0447844	37.3334	17.1046	97.6351	13.3943	40.2389	2.62145	0.156834	0.000183287	169.892	1103.96	0.0184028	2.81788e-07	0	3668.28	37.4154	92.159	58.7984	0.141815	6342.92
2018	Shaanxi	7399.64	4908.05	116888	1055.34	68.9265	9.21207	0.586291	1.33204	4478.12	5837.92	4450.7	12.9889	1.25434	9213.18	179.316	24179.8	2571.59	9246.93	559.735	36.0254	0.0391355	13747.4	34031.8	0.943664	6.47278e-05	6.59632	0	5691.56	307.156	475.49	10.5554	245370
2018	Gansu	1373.04	931.993	21442.9	208.422	1175.37	157.089	9.99772	22.7146	2667.84	1461.47	47314.2	53.8447	13.3346	1668.55	39413.1	4735.53	533.286	217526	8236.47	846.955	0.575877	2558.4	6777.36	0.379614	0.00152175	1120.57	164355	0	88391.7	136826	3037.63	752860
2018	Qinghai	115.766	78.4688	1809.2	17.5072	93.0487	12.436	0.791475	1.79821	244.301	161.096	3778.7	14.7871	1.06495	140.967	3118.11	490.16	45.8501	17196	651.419	66.9541	0.0455459	243.602	804.911	0.0344842	0.000120298	12191.6	13880.6	129416	0	10824.6	1007.46	196408
2018	Ningxia	418.139	471.757	4355.12	174.734	10625.9	1420.16	90.3842	205.351	16253.6	2771.41	424209	91.9006	119.555	107.102	359808	284.776	32.6384	2487.49	96.3746	9.68544	0.00673832	160.477	402.617	0.0132696	1.74021e-05	12.4191	10559.6	18114.7	977.581	0	33.5951	854294
2018	Xinjiang	77.9999	52.9445	1218.12	11.8438	66.7699	8.92384	0.567947	1.29036	726.986	5403.64	9622.42	41433.2	2.71189	205.12	2238.97	366318	1806.65	12431.7	616.564	48.4168	0.0431089	158.023	385.103	0.022188	8.69916e-05	63.6569	9336.61	93046	5021.32	7772.77	0	558076
2018	Total inflow	584425	288001	1.30457e+06	83970.9	97270.2	704954	129581	74858.7	373972	594649	782919	47602	508.878	57966.4	757332	430119	37516.9	322897	1.18492e+06	11107.1	152.377	103420	46023.6	848.034	0.824787	13437.2	233062	246531	94802.1	157912	4089.8
2017		Beijing	Tianjin	Hebei	Shanxi	Inner Mongolia	Liaoning	Jilin	Heilongjiang	Shanghai	Jiangsu	Zhejiang	Anhui	Fujian	Jiangxi	Shandong	Henan	Hubei	Hunan	Guangdong	Guangxi	Hainan	Chongqing	Sichuan	Guizhou	Yunnan	Tibet	Shaanxi	Gansu	Qinghai	Ningxia	Xinjiang	Total outlow
2017	Beijing	0	8.50032	166.891	1.32132	0.0990326	0.0137174	0.000544531	0.00224956	0.00273902	0.167053	0.000747964	0.000255974	4.48484e-07	8.36911e-05	0.0438462	0.0190704	0.00111687	8.70843e-05	0.000105806	5.5052e-07	7.13953e-09	4.20268e-05	3.50739e-05	7.93708e-10	2.52258e-11	4.51008e-08	0.00174092	4.04002e-05	3.87352e-06	6.45719e-05	1.615e-07	177.066
2017	Tianjin	10393.2	0	49.6905	0.393413	0.0294862	0.00408425	0.00016213	0.000669789	0.000815521	0.0497387	0.0002227	7.62142e-05	1.33532e-07	2.49183e-05	0.0130548	0.00567806	0.000332538	2.59286e-05	3.1503e-05	1.63913e-07	2.12574e-09	1.25131e-05	1.0443e-05	2.3632e-10	7.51078e-12	1.34284e-08	0.000518344	1.20288e-05	1.15331e-06	1.92257e-05	4.80855e-08	10443.4
2017	Hebei	149024	119014	0	18500	1386.57	192.059	7.62406	31.4964	38.3494	2338.93	10.4723	3.58393	0.00627928	1.17177	613.896	267.007	15.6374	1.21928	1.48141	0.0077079	9.99615e-05	0.588423	0.491074	1.11128e-05	3.5319e-07	0.000631462	24.3748	0.565648	0.0542337	0.904079	0.00226119	291474
2017	Shanxi	131828	10849.5	210496	0	287.037	39.7587	1.57828	6.52016	2534.45	154679	679.609	237.011	0.407498	73.1552	39927.9	17646.2	1033.15	76.0581	97.6868	0.481195	0.00659163	33.4737	24.2162	0.000589594	2.20493e-05	0.030425	1200.06	27.2356	2.61132	1.72405	0.108875	571783
2017	Inner Mongolia	113485	116758	869884	52975.8	0	460079	18263.5	75449.8	171.593	6755.27	500.211	10.4213	0.29993	160.767	26101.2	1192.09	80.8396	169.579	14.5185	1.05823	0.000979668	199.13	301.184	0.0053062	4.84901e-05	0.4132	15019.3	370.805	35.5523	2109.95	1.4823	1.76009e+06
2017	Liaoning	117062	598.963	1041.73	16.4818	593.947	0	174.164	13.6284	0.0452029	2.09407	0.0933394	0.00322127	5.59669e-05	0.029167	43756.2	0.314255	0.0203741	0.0307593	0.00315577	0.000191987	2.12943e-07	0.0357995	0.0539955	9.52216e-07	8.79717e-09	7.40615e-05	2.69258	0.0664622	0.00637231	0.377304	0.000265684	163263
2017	Jilin	16015.9	286.815	1674.7	95.6444	5937.44	154791	0	610.508	0.308694	12.1952	0.894683	0.0188121	0.000536458	0.287438	5957.76	2.14459	0.145305	0.303192	0.0260283	0.00189203	1.75632e-06	0.355983	0.538404	9.48561e-06	8.66961e-08	0.000738644	26.8489	0.662857	0.0635538	3.77166	0.00264978	185418
2017	Heilongjiang	2404.96	119.114	820.209	49.0277	3065.35	22821.4	86546.8	0	0.158644	6.25167	0.461707	0.00964418	0.000276843	0.148376	883.937	1.10213	0.074721	0.156508	0.0134097	0.000976668	9.04851e-07	0.183775	0.277957	4.89701e-06	4.47527e-08	0.000381335	13.861	0.342208	0.0328105	1.94721	0.00136798	116736
2017	Shanghai	3.56378e-05	2.84231e-05	0.000558046	4.91181e-06	3.31207e-07	4.58769e-08	1.82115e-09	7.5235e-09	0	10951.5	4176.77	17.3977	2.50442	0.0121564	0.000321888	0.00933622	0.206158	0.0128806	0.0196756	8.17236e-05	1.32766e-06	0.0226925	0.175375	2.86983e-06	3.74472e-09	6.44932e-06	0.00445909	0.000116138	1.18328e-05	0.00104224	4.64765e-07	15148.7
2017	Jiangsu	5.1255e-06	4.08815e-06	8.02648e-05	7.02774e-07	4.76377e-08	6.5985e-09	2.61936e-10	1.08211e-09	27206.8	0	7603.48	2679.72	4.5591	0.00165688	0.000582728	0.00127317	0.028093	0.00175827	0.00315035	1.11892e-05	2.12577e-07	0.00319241	0.0248133	4.05891e-07	5.1271e-10	9.39788e-07	0.000639766	4.15842e-05	4.08566e-06	0.0018877	1.66304e-07	37494.6
2017	Zhejiang	3.36785e-05	2.68913e-05	0.000527971	4.2471e-06	3.13305e-07	4.33972e-08	1.72271e-09	7.11684e-09	25385.5	2569.92	0	117.633	456.211	0.00160085	0.0582853	0.00130226	0.0265368	0.00198625	0.0532422	1.62238e-05	3.59263e-06	0.0137422	0.121479	1.97128e-06	7.43405e-10	7.41716e-06	0.0040466	0.00279905	0.000268843	0.188817	1.11896e-05	28529.7
2017	Anhui	5.22563e-06	4.1723e-06	8.1917e-05	6.61845e-07	4.86109e-08	6.73331e-09	2.67288e-10	1.10422e-09	5120.12	88876.3	112581	0	67.5042	0.000319907	0.00862431	0.000256459	0.00533475	0.000381869	0.00801057	2.9586e-06	5.40531e-07	0.00218799	0.0191691	3.11226e-07	1.35568e-10	1.1413e-06	0.000629091	0.000414855	3.98507e-05	0.0279387	1.65844e-06	206645
2017	Fujian	9.50063e-07	7.58599e-07	1.4894e-05	1.1981e-07	8.83827e-09	1.22423e-09	4.85973e-11	2.00765e-10	716.12	72.4969	21463.4	3.3184	0	4.516e-05	0.00164422	3.67367e-05	0.000748602	6.82541e-05	69.6634	0.00502068	0.00470069	0.000387734	0.00342691	2.12092e-06	2.30056e-07	2.09237e-07	0.000114154	7.89606e-05	7.58402e-06	0.00532649	3.15656e-07	22325.1
2017	Jiangxi	4.01909e-05	6.3158e-06	0.000123314	0.000334549	1.17439e-07	1.62669e-08	6.45737e-10	2.66766e-09	17.1041	8.75675	0.392769	0.0134707	0.000235507	0	1.1775e-05	6.28005	140.586	8.57723	13.2183	0.054424	0.000891932	2.40493	0.0206592	2.2724e-05	2.49381e-06	7.96167e-07	0.000526653	4.72592e-05	4.61322e-06	2.77551e-06	1.88978e-07	197.411
2017	Shandong	50.5033	40.3333	791.885	6.26955	0.469901	0.065088	0.00258375	0.010674	0.0129964	0.792653	0.00354902	0.00121457	2.12802e-06	0.000397107	0	0.0904873	0.00529944	0.000413207	0.000502042	2.61217e-06	3.38764e-08	0.000199413	0.000166422	3.76608e-09	1.19694e-10	2.13999e-07	0.0082605	0.000191695	1.83795e-05	0.000306388	7.66305e-07	890.456
2017	Henan	0.00143048	0.000224792	0.00438901	0.0119073	4.17988e-06	5.78973e-07	2.29831e-08	9.49476e-08	608.77	311.671	13.9794	0.479451	0.00838217	293.93	0.000419097	0	5003.76	305.281	470.465	1.93706	0.0317457	85.5962	0.735304	0.000808796	8.87597e-05	2.83372e-05	0.0187447	0.00168205	0.000164194	9.87862e-05	6.72613e-06	7096.68
2017	Hubei	0.145412	0.0228508	0.446156	1.21041	0.000424897	5.88543e-05	2.3363e-06	9.65171e-06	61883.3	31682.3	1421.05	48.7376	0.852072	29878.8	0.0426024	22721.5	0	31032.8	47824.2	196.908	3.22705	8701.12	74.7459	0.0822165	0.00902269	0.00288056	1.90545	0.170986	0.0166908	0.0100419	0.000683731	235474
2017	Hunan	0.000781792	0.00061215	0.0120183	0.000253115	7.1526e-06	9.90736e-07	3.93286e-08	1.62474e-07	8.10999	4.14581	0.209639	0.00638113	0.000125701	3.90932	0.0354426	2.97596	66.5341	0	20657.6	3066.45	1.39392	1.18113	0.0137844	1.26153	0.14051	0.00219847	0.0957455	2.02569	0.194214	0.114791	0.00809774	23816.4
2017	Guangdong	2.41882e-09	1.92344e-09	3.77638e-08	4.06212e-10	2.24231e-11	3.10592e-12	1.23293e-13	5.09349e-13	0.000288059	2.01495e-05	7.87595e-06	3.20383e-08	4.72247e-09	2.65027e-06	1.09654e-08	2.02197e-06	4.50641e-05	0.150447	0	61.7945	57.8601	0.000838058	1.07297e-05	0.0254221	0.00283154	1.06618e-09	3.01684e-07	6.26064e-07	6.00669e-08	3.54793e-08	2.50273e-09	119.835
2017	Guangxi	1.12864e-05	8.97491e-06	0.000176208	1.89541e-06	1.04628e-07	1.44924e-08	5.75296e-10	2.37666e-09	1.3441	0.0940189	0.0367497	0.000149493	2.20354e-05	0.0123664	5.11652e-05	0.00943466	0.210272	701.997	19677.6	0	1.32779	3.91044	0.0500656	118.621	13.2121	4.97487e-06	0.00140768	0.00292126	0.000280276	0.000165549	1.16779e-05	20518.4
2017	Hainan	5.81043e-13	4.62045e-13	9.07154e-12	9.75794e-14	5.38643e-15	7.46097e-16	2.96173e-17	1.22355e-16	6.91969e-08	4.84027e-09	1.89195e-09	7.69618e-12	1.13442e-12	6.36644e-10	2.63408e-12	4.85714e-10	1.08252e-08	3.61401e-05	205.981	0.0148442	0	2.01317e-07	2.57747e-09	6.10686e-06	6.80186e-07	2.56116e-13	7.24698e-11	1.50392e-10	1.44291e-11	8.52278e-12	6.01201e-13	205.996
2017	Chongqing	0.186362	0.148255	2.91075	0.0305335	0.00172822	0.000239383	9.50264e-06	3.92572e-05	515.42	360.666	167.961	0.577503	0.100711	185.054	0.0103726	141.204	3146.19	1606.78	355.248	10.0425	0.0239711	0	915.752	0.0189413	0.000460165	0.0335983	23.2567	0.534554	0.0548953	0.0303345	0.00213951	7432.24
2017	Sichuan	77.7724	62.11	1219.44	9.66736	0.723612	0.100231	0.00397879	0.0164371	55777.6	69143.8	66751.3	115.877	40.0245	175.134	4.19657	334	1257.68	737.784	148.207	4.62422	0.0100006	41974.8	0	6.2092	0.00021189	14.0792	9747.54	221.278	22.7427	12.5562	0.885659	247860
2017	Guizhou	0.0267116	0.0212491	0.417193	0.0043835	0.000247704	3.43105e-05	1.362e-06	5.62669e-06	74.2176	51.8442	24.0463	0.082999	0.0144183	26.7015	0.00349052	20.374	453.968	28059.9	164409	1240.28	11.0938	15265.3	131.04	0	0.056832	0.00493218	3.33332	0.191158	0.0188489	0.0108385	0.000764532	209772
2017	Yunnan	0.231609	0.184966	3.63154	0.028793	0.00215494	0.00029849	1.1849e-05	4.89504e-05	90928.6	5183.97	2097.32	8.25329	1.25757	0.600338	0.0126493	1.05457	5.08657	87.7839	739227	3513.4	49.881	166.922	1143.04	1273.89	0	0.0419287	29.0285	0.659333	0.0677631	0.037884	0.00263896	843722
2017	Tibet	0.261973	0.209215	4.10763	0.0325612	0.00243746	0.000337623	1.34024e-05	5.53678e-05	132.675	164.38	160.986	0.275825	0.096528	0.518217	3.59533	1.59436	3.01746	13.0217	0.82816	0.081272	5.5882e-05	99.8893	912.427	0.0147895	3.72403e-06	0	32.8235	205.474	4089.29	11.6437	3.7444	5840.99
2017	Shaanxi	4507.96	3600.13	70683.3	560.187	41.9433	5.80974	0.230625	0.952757	1813.57	2194.68	2118.27	3.67795	1.27013	5949.27	242.867	16164.3	1363.35	6215.47	385.838	38.7762	0.0260353	7462.17	11329	0.199168	0.0017768	14.3204	0	12821.5	1229.31	726.586	51.2541	149526
2017	Gansu	556.744	444.625	8729.56	69.1844	5.18009	0.717516	0.0284828	0.117668	945.245	533.088	17062.6	3.36622	10.2309	735.12	25869	2822.13	188.302	81303.1	3432.39	507.101	0.231608	1045.14	2536.88	0.249648	0.0232363	1604.6	69702.4	0	141775	83796.2	5911.29	449590
2017	Qinghai	15.6653	12.5105	245.626	1.94666	0.145754	0.020189	0.000801428	0.00331085	60.1004	56.5365	518.775	0.164115	0.311061	20.7605	725.715	162.266	6.59392	2281.3	96.4314	14.2289	0.00650692	54.5508	301.798	0.0107345	0.000651993	9367.36	1961.24	41483.8	0	2350.77	757.479	60496.1
2017	Ningxia	53.7895	42.9572	843.402	6.68318	0.500472	0.0693225	0.00275185	0.0113684	7437.62	775.468	222339	34.4126	133.316	60.148	345986	172.411	14.008	939.004	40.7397	5.8568	0.00274901	76.786	126.942	0.00446242	0.000268369	17.5824	5711.01	16200	1553.19	0	64.7599	602635
2017	Xinjiang	25.1689	20.0998	394.63	3.13372	0.234173	0.0324363	0.0012876	0.00531933	358.538	185.782	778.583	0.400895	0.466844	185.712	1169.43	387341	2604.28	3833.75	399.225	23.9288	0.0269386	91.6507	115.063	0.0117051	0.00109646	72.5372	3150.97	66847.8	6409.06	3788.09	0	477800
2017	Total inflow	545501	251858	1.16705e+06	72297.1	11319.7	637930	104994	76113.1	281736	376922	460470	3285.44	719.442	37751.3	491242	449000	15383.7	157374	997527	8687.03	125.157	75265.2	17914.6	1400.61	13.4492	11091	106651	138183	155117	92805	6791.02
2016		Beijing	Tianjin	Hebei	Shanxi	Inner Mongolia	Liaoning	Jilin	Heilongjiang	Shanghai	Jiangsu	Zhejiang	Anhui	Fujian	Jiangxi	Shandong	Henan	Hubei	Hunan	Guangdong	Guangxi	Hainan	Chongqing	Sichuan	Guizhou	Yunnan	Tibet	Shaanxi	Gansu	Qinghai	Ningxia	Xinjiang	Total outlow
2016	Beijing	0	5.94057	298.995	0.345382	0.0521733	0.00721199	0.000274842	0.00124849	0.0012874	0.0307492	0.000176093	6.52826e-05	2.91726e-07	0.000355433	10.1228	0.00157081	0.00615373	0.000418269	0.000584157	2.15464e-06	6.83858e-08	0.0001243	8.98593e-06	1.81603e-09	2.03611e-10	1.32903e-08	0.000552143	1.36447e-05	1.37235e-06	3.82958e-05	4.58923e-08	315.507
2016	Tianjin	5864.71	0	369.285	0.426577	0.0644385	0.00890743	0.000339454	0.001542	0.00159005	0.0379779	0.00021749	8.06297e-05	3.60307e-07	0.00043899	12.5025	0.00194009	0.00760038	0.000516598	0.000721484	2.66117e-06	8.44623e-08	0.000153522	1.10984e-05	2.24295e-09	2.51477e-10	1.64147e-08	0.000681944	1.68524e-05	1.69497e-06	4.72986e-05	5.66809e-08	6247.05
2016	Hebei	123450	36128.8	0	2100.51	317.302	43.8612	1.67151	7.59297	7.82961	187.007	1.07094	0.39703	0.00177419	2.16164	61563.8	9.55321	37.4252	2.54379	3.55267	0.0131039	0.000415902	0.755959	0.0546498	1.10445e-05	1.2383e-06	8.08279e-05	3.35797	0.082983	0.00834625	0.232904	0.000279103	223870
2016	Shanxi	118696	3592.71	180825	0	31.5531	4.36164	0.166218	0.755059	3544.25	84723.9	475.19	179.871	0.78723	968.893	6122.39	4322.88	16945.3	1150.28	1608.49	5.92549	0.188302	333.901	15.3623	0.00498827	0.000559952	0.0197926	855.016	20.262	2.03792	1.14531	0.0681489	424427
2016	Inner Mongolia	86371.7	21202.8	750524	50618.3	0	385165	14678.3	66677.3	247.752	4551.42	219.444	9.72784	0.363545	254.424	41184.6	333.275	1107.72	104.099	106.756	0.536247	0.0124977	184.41	183.004	0.000567904	5.06747e-05	0.327282	12963.9	337.136	33.9083	2023.54	1.13392	1.43909e+06
2016	Liaoning	75227.9	15857.3	5493.68	1090.47	215.126	0	95.4243	5.1805	4.06577	97.0845	0.559486	0.206118	0.00092688	1.12587	38004	4.96136	19.4328	1.32137	1.84473	0.0068068	0.000215958	0.395466	0.0316665	5.73918e-06	6.43235e-07	4.78622e-05	1.97694	0.0491588	0.00494428	0.157512	0.00016534	136122
2016	Jilin	8878.75	1875.25	1567.69	189.682	3466.96	112899	0	233.887	0.780131	16.9428	0.336309	0.0360511	0.00055715	0.445561	4482.39	0.990206	3.6343	0.282668	0.346979	0.00145612	4.06199e-05	0.273907	0.229748	1.37073e-06	1.37601e-07	0.000409857	16.2442	0.42218	0.0424618	2.51795	0.00141995	133637
2016	Heilongjiang	1457.15	310.115	842.164	69.927	2758.61	17961.4	68310	0	0.319073	6.26997	0.227151	0.0133757	0.000376312	0.27206	733.71	0.419954	1.44947	0.127009	0.13918	0.000654269	1.62935e-05	0.189524	0.1815	6.66097e-07	6.18276e-08	0.000324433	12.8525	0.334198	0.0336128	2.0034	0.00112404	92467.9
2016	Shanghai	9.63596e-05	1.98514e-05	0.000999141	0.000256218	1.74345e-07	2.41e-08	9.18429e-10	4.17204e-09	0	2528.16	4207.61	6.7739	6.9706	0.0103825	3.69141e-05	0.00542069	0.182142	0.0129173	0.0181626	6.65414e-05	2.12625e-06	0.0391488	0.405137	8.27563e-08	6.28808e-09	1.15634e-05	0.00703169	0.000168937	1.85772e-05	9.36e-06	5.68201e-07	6750.19
2016	Jiangsu	1.2369e-05	2.54819e-06	0.000128253	3.2889e-05	2.23795e-08	3.09356e-09	1.17893e-10	5.35537e-10	22024.9	0	6859.12	2946.41	11.3633	0.00133273	4.73842e-06	0.000695818	0.0233803	0.0016581	0.00359663	8.54148e-06	4.21048e-07	0.00502527	0.0520048	1.06229e-08	8.07159e-10	1.48432e-06	0.000902612	2.16854e-05	2.38463e-06	1.20148e-06	7.29362e-08	31841.9
2016	Zhejiang	7.06832e-06	1.45617e-06	7.32904e-05	1.87945e-05	1.27888e-08	1.76782e-09	6.737e-11	3.06034e-10	12586.2	913.507	0	180.285	880.877	0.00076159	2.70778e-06	0.000397626	0.0133607	0.000947526	0.107733	4.88104e-06	1.2612e-05	0.0028717	0.0297182	6.07046e-09	4.61253e-10	8.48215e-07	0.000515799	1.23921e-05	1.3627e-06	6.86589e-07	4.16795e-08	14561
2016	Anhui	1.37359e-06	2.82979e-07	1.42426e-05	3.65235e-06	2.48527e-09	3.43543e-10	1.30921e-11	5.94719e-11	2445.89	50224.2	69988.1	0	115.947	0.000148001	5.26206e-07	7.72712e-05	0.00259641	0.000184134	0.0142602	9.48539e-07	1.6694e-06	0.000558061	0.00577518	1.17968e-09	8.96358e-11	1.64835e-07	0.000100236	2.40818e-06	2.64816e-07	1.33426e-07	8.09963e-09	122774
2016	Fujian	1.35949e-07	2.80073e-08	1.40964e-06	3.61485e-07	2.45975e-10	3.40015e-11	1.29576e-12	5.88612e-12	242.077	17.57	10226.8	3.46752	0	1.46481e-05	5.20803e-08	7.64777e-06	0.000256975	1.82243e-05	59.3603	9.38799e-08	0.00694915	5.5233e-05	0.000571588	1.16757e-10	8.87153e-12	1.63142e-08	9.92066e-06	2.38345e-07	2.62096e-08	1.32055e-08	8.01646e-10	10549.3
2016	Jiangxi	0.0540532	0.00163862	0.0824733	0.433304	1.43912e-05	1.98932e-06	7.5811e-08	3.44378e-07	40.409	17.7376	1.07924	0.0379862	0.00178793	0	0.00279284	9.117	309.363	20.9653	29.3636	0.107999	0.00343752	5.89929	0.0603486	9.07762e-05	1.02058e-05	1.73127e-06	0.00143657	3.43864e-05	3.69471e-06	1.91551e-06	1.15655e-07	434.722
2016	Shandong	0	0	0	0	0	0	0	0	0	0	0	0	0	0	0	0	0	0	0	0	0	0	0	0	0	0	0	0	0	0	0	0
2016	Henan	0.762917	0.0231277	1.16404	6.11573	0.00020312	2.80776e-05	1.07001e-06	4.86061e-06	570.34	250.352	15.2326	0.536144	0.0252352	246.4	0.0394187	0	4366.41	295.908	414.443	1.52432	0.0485178	83.2637	0.851771	0.00128123	0.000144046	2.44355e-05	0.020276	0.000485337	5.21479e-05	2.70359e-05	1.63237e-06	6253.46
2016	Hubei	63.6011	1.92806	97.0414	509.843	0.0169332	0.00234071	8.92022e-05	0.000405208	47546.8	20870.8	1269.87	44.696	2.10375	20541.3	3.28617	10727.4	0	24668.6	34550.4	127.076	4.04472	6941.34	71.0085	0.106811	0.0120085	0.00203709	1.69033	0.0404604	0.00434735	0.00225387	0.000136084	168043
2016	Hunan	0.0465183	0.00141023	0.0709785	0.372901	1.23854e-05	1.71205e-06	6.52448e-08	2.9638e-07	34.7973	15.2655	0.929465	0.0326921	0.00153981	15.024	0.00240359	7.84608	266.238	0	21474.4	1985.19	2.51395	5.13645	0.052806	1.5867	0.187599	1.51477e-06	0.00125141	2.99557e-05	3.21956e-06	1.66859e-06	1.00753e-07	23809.7
2016	Guangdong	0	0	0	0	0	0	0	0	0	0	0	0	0	0	0	0	0	0	0	0	79.0368	0	0	0	0	0	0	0	0	0	0	79.0368
2016	Guangxi	9.36145e-05	6.25775e-06	0.000314959	0.000646162	5.49589e-08	7.59705e-09	2.89517e-10	1.31515e-09	2.07163	0.0706876	0.0649235	0.000171715	0.000107556	0.0260456	1.12877e-05	0.0136017	0.461177	591.209	11570.6	0	1.35454	5.60775	0.0819188	149.224	17.643	2.33813e-06	0.00142234	3.41718e-05	3.75759e-06	1.89331e-06	1.14933e-07	12338.5
2016	Hainan	0	0	0	0	0	0	0	0	0	0	0	0	0	0	0	0	0	0	270.558	0	0	0	0	0	0	0	0	0	0	0	0	270.558
2016	Chongqing	0.295398	0.0474593	2.38868	1.19394	0.000416813	5.76167e-05	2.19572e-06	9.97423e-06	255.013	215.389	164.027	0.511889	0.271738	48.2386	0.0878933	25.1888	850.634	1472.02	159.494	7.5839	0.0186715	0	921.487	0.0742184	0.00071667	0.026301	15.9942	0.384262	0.0422553	0.0212901	0.00129242	4140.44
2016	Sichuan	47.5796	13.9093	700.072	1.27525	0.122159	0.0168863	0.00064352	0.00292324	46636.2	53966.2	52149.3	131.962	86.3939	95.2552	25.9747	48.6983	329.81	444.785	54.8363	2.29154	0.00641955	26276.8	0	0.0216803	0.000216547	8.51422	5177.33	124.386	13.6782	6.89163	0.418358	186343
2016	Guizhou	0.0484063	0.00736386	0.370631	0.208247	6.46733e-05	8.9399e-06	3.40691e-07	1.54762e-06	41.4841	34.0251	25.1835	0.0806192	0.0417205	8.41092	0.0136235	4.392	148.406	26488	164966	5833.27	19.3121	13817.7	141.117	0	0.551237	0.00402775	2.44938	0.0588467	0.00647105	0.00326041	0.000197924	211531
2016	Yunnan	0.166893	0.0487662	2.45446	0.00517582	0.000428291	5.92034e-05	2.25618e-06	1.02489e-05	84855	1437.06	2259.63	3.80613	3.74344	0.362352	0.0910672	0.185561	1.65961	82.0993	583653	2445.83	68.3267	130.16	1045.81	1014.85	0	0.0298493	18.1508	0.436075	0.0479531	0.0241608	0.00146669	677023
2016	Tibet	0.143621	0.0419973	2.11377	0.00350401	0.000368842	5.09857e-05	1.94302e-06	8.82631e-06	94.0498	108.811	105.652	0.266242	0.17503	0.273656	2.1804	0.192887	0.748419	0.913951	0.119124	0.00470867	1.39455e-05	53.0391	601.437	4.38279e-05	4.44964e-07	0	15.6327	115.397	3494.97	6.39352	0.388125	4602.95
2016	Shaanxi	3418.89	1000.29	50345.5	66.8293	8.78505	1.21437	0.0462786	0.210224	1598.28	1295.82	977.568	3.07652	1.6195	5848.14	1865.75	2978.72	5950.8	1237.09	611.239	6.37269	0.0715561	4803.52	5251	0.00872194	0.000602211	8.57907	0	8824	887.497	488.895	29.6785	97509.5
2016	Gansu	488.818	143.016	7198.17	9.56288	1.25605	0.173625	0.00661669	0.0300569	425.998	279.434	5436.44	2.4162	9.00635	836.459	21802.5	970.46	856.479	177.903	87.9665	0.916445	0.010298	728.135	1220.12	0.0012825	8.66029e-05	1127.25	53238.5	0	118650	65361.4	3967.83	283020
2016	Qinghai	8.9081	2.60629	131.177	0.174442	0.0228898	0.0031641	0.000120581	0.000547748	30.8801	31.8528	124.682	0.109385	0.206557	15.2503	396.283	17.6627	15.7305	3.45414	1.62604	0.0177937	0.000190356	26.2707	170.173	3.40661e-05	1.68148e-06	6182.87	970.203	21442	0	1187.98	72.1175	30832.2
2016	Ningxia	28.0308	8.20116	412.773	0.548021	0.072027	0.0099564	0.000379429	0.00172359	1840.56	144.237	77173.7	26.1913	127.851	47.9518	318697	31.0806	48.8606	10.1554	5.03408	0.052314	0.000589326	39.8892	48.7951	7.19441e-05	4.94361e-06	13.8383	3052.92	14481.4	1456.47	0	48.7064	417744
2016	Xinjiang	11.155	3.14465	158.274	3.84761	0.027618	0.00381768	0.000145488	0.000660892	348.623	155.053	128.076	0.371849	0.212178	164.896	477.32	268315	2616.34	179.931	248.479	0.926883	0.0290888	65.474	27.2174	0.000790285	8.75894e-05	24.6775	1165.5	25826.2	2597.47	1430.88	0	303949
2016	Total inflow	424015	80146.1	998973	54670.1	6799.97	516075	83085.6	66925	225425	222088	231810	3541.29	1247.97	29095.3	495384	287808	33877.2	56931.7	819877	10417.6	174.986	53502.2	9698.56	1165.88	18.3963	7366.14	77511.8	71172.5	127136	70512.1	4120.35
2015		Beijing	Tianjin	Hebei	Shanxi	Inner Mongolia	Liaoning	Jilin	Heilongjiang	Shanghai	Jiangsu	Zhejiang	Anhui	Fujian	Jiangxi	Shandong	Henan	Hubei	Hunan	Guangdong	Guangxi	Hainan	Chongqing	Sichuan	Guizhou	Yunnan	Tibet	Shaanxi	Gansu	Qinghai	Ningxia	Xinjiang	Total outlow
2015	Beijing	0	2.58208	146.512	0.143181	0.0209722	0.00299995	0.000130286	0.000614682	0.000528571	0.0132114	5.70004e-05	8.25351e-06	3.17285e-08	0.000173666	4.14342	0.000672006	0.00265666	0.000216824	0.000245034	1.04932e-06	4.9083e-07	4.01307e-05	7.64723e-06	2.27767e-08	1.05188e-10	7.60002e-09	0.000322807	6.77153e-06	6.40579e-07	1.89728e-05	1.2915e-08	153.423
2015	Tianjin	5636.43	0	120.83	0.118083	0.017296	0.00247409	0.000107449	0.000506937	0.000435919	0.0108956	4.7009e-05	6.80678e-06	2.61669e-08	0.000143224	3.41713	0.000554212	0.00219098	0.000178818	0.000202083	8.65386e-07	4.04794e-07	3.30963e-05	6.30677e-06	1.87843e-08	8.67499e-11	6.26783e-09	0.000266223	5.58457e-06	5.28294e-07	1.56471e-05	1.06512e-08	5760.83
2015	Hebei	80214.9	24456.7	0	1356.16	198.642	28.4145	1.23403	5.82207	5.00646	125.134	0.53989	0.0781746	0.000300522	1.64491	39245.2	6.36502	25.163	2.05369	2.32088	0.0099388	0.00464898	0.380105	0.0724321	0.000215734	9.96307e-07	7.19849e-05	3.05753	0.0641377	0.00606736	0.179704	0.000122327	145679
2015	Shanxi	62338	2516.54	142792	0	20.4398	2.92379	0.126979	0.599079	2581.24	64611.7	276.025	40.3643	0.153645	838.19	4038.42	3283.13	12981.7	1057.86	1197.26	5.11941	2.39824	186.777	21.0914	0.105965	0.00051319	0.0199305	880.597	17.2388	1.63081	0.550908	0.0329269	299693
2015	Inner Mongolia	62774.2	17585.1	683622	46774.8	0	339098	14726.8	69480.5	263.711	4402.8	82.2027	2.76031	0.045757	314.694	29915.9	302.147	1139.29	130.987	107.241	0.635623	0.214816	232.022	378.437	0.132674	6.37175e-05	0.399858	16198.8	368.233	34.8334	2132.31	0.701205	1.29007e+06
2015	Liaoning	50310.5	14141.5	755.905	130.212	603.29	0	430.809	17.9698	0.503195	12.0362	0.0675523	0.00752176	3.7602e-05	0.221693	25191.2	0.631557	2.48311	0.212053	0.229561	0.00102665	0.000459835	0.0906019	0.0998712	5.16661e-05	1.02916e-07	0.000105126	4.27117	0.0966236	0.00914023	0.542742	0.000184011	91602.9
2015	Jilin	6019.39	1691.86	1134.09	86.838	3695.07	102383	0	368.457	0.462395	8.14792	0.133621	0.00510544	7.43784e-05	0.507191	3011.68	0.536266	2.03406	0.225213	0.190974	0.00109259	0.000382541	0.365373	0.590296	0.000208909	1.09525e-07	0.000623663	25.2668	0.574315	0.0543279	3.32368	0.00109364	118433
2015	Heilongjiang	1078.91	303.204	701.921	49.6117	2393.29	17810.2	66231.5	0	0.275043	4.66538	0.0839317	0.00292445	4.67194e-05	0.320567	538.701	0.316241	1.19449	0.13585	0.112353	0.000659175	0.000225055	0.234882	0.382134	0.000134306	6.60784e-08	0.000403756	16.3569	0.371819	0.0351727	2.15274	0.000708034	89134.1
2015	Shanghai	0.000768291	5.50446e-05	0.00312332	0.00761176	4.47083e-07	6.39525e-08	2.77742e-09	1.31037e-08	0	3063.75	3219.07	6.92441	1.79185	0.421357	9.02069e-05	0.194384	6.62789	0.539632	0.611425	0.00261172	0.00122475	0.115034	0.313022	6.87729e-05	2.61809e-07	0.000112468	0.00920289	0.000180446	2.57849e-05	5.57559e-06	3.49563e-07	6300.39
2015	Jiangsu	0.213588	0.00863149	0.489765	2.39898	7.01067e-05	1.00283e-05	4.35525e-07	2.05479e-06	15961.1	0	3784.87	643.103	2.10679	132.782	0.0138521	61.2625	2089.32	169.92	192.672	0.822298	0.385943	28.1679	0.118728	0.0159719	8.24306e-05	4.27008e-05	0.00650156	0.000127412	1.53568e-05	3.99935e-06	2.11967e-06	23069.8
2015	Zhejiang	0.000199863	1.49345e-05	0.000847407	0.00195403	1.21301e-07	1.73514e-08	7.5356e-10	3.55525e-09	8108.68	827.76	0	42.1965	210.841	0.108169	2.45016e-05	0.0499009	1.70142	0.138545	0.177489	0.000670537	0.000355531	0.0302764	0.0894436	1.81808e-05	6.72174e-08	3.21368e-05	0.00262938	5.15556e-05	7.36732e-06	1.59301e-06	9.97018e-08	9191.78
2015	Anhui	0.00563863	0.000228748	0.0129795	0.0632948	1.85794e-06	2.65767e-07	1.15421e-08	5.44551e-08	1460.47	27196.3	48728.1	0	27.1238	3.50332	0.000367172	1.61635	55.1246	4.48319	5.08611	0.0216956	0.010188	0.744125	0.0146032	0.000422067	2.17486e-06	5.24798e-06	0.000508426	9.9672e-06	1.34941e-06	3.09616e-07	6.85037e-08	77482.6
2015	Fujian	4.11753e-06	3.07677e-07	1.74581e-05	4.02566e-05	2.49901e-09	3.57469e-10	1.55247e-11	7.32446e-11	167.053	17.0533	7803.48	0.869323	0	0.00222848	5.04778e-07	0.00102805	0.0350524	0.00285427	44.1916	1.38143e-05	0.0885206	0.000623747	0.0018427	3.74557e-07	1.3848e-09	6.62075e-07	5.41699e-05	1.06214e-06	1.5178e-07	3.28188e-08	2.05403e-09	8032.78
2015	Jiangxi	0.00281798	0.000113845	0.00645973	0.0316526	9.24668e-07	1.32268e-07	5.74434e-09	2.71015e-08	3.408	1.54272	0.0815401	0.00108076	4.53882e-05	0	0.000182699	0.808308	27.5668	2.24195	2.54215	0.0108495	0.0050922	0.371615	0.00110626	0.00021071	1.0876e-06	3.98034e-07	7.22652e-05	1.41606e-06	1.64732e-07	4.45788e-08	2.74625e-08	38.6228
2015	Shandong	0	0	0	0	0	0	0	0	0	0	0	0	0	0	0	0	0	0	0	0	0	0	0	0	0	0	0	0	0	0	0	0
2015	Henan	0.356532	0.0144037	0.81729	4.0047	0.00011699	1.67347e-05	7.26778e-07	3.4289e-06	431.182	195.185	10.3165	0.136738	0.00574253	221.657	0.0231169	0	3487.77	283.653	321.634	1.37269	0.644267	47.0169	0.139965	0.0266591	0.000137604	5.0471e-05	0.00915236	0.000334674	3.55486e-05	1.0445e-05	0.0107123	5005.98
2015	Hubei	25.547	1.03208	58.5621	286.953	0.00838278	0.00119911	5.20765e-05	0.000245694	30896	13985.8	739.219	9.79783	0.411476	15882.6	1.6563	7327.89	0	20324.9	23046.4	98.3588	46.1644	3368.95	10.0291	1.91023	0.0098599	0.00360846	0.655136	0.0128376	0.00149342	0.000404138	0.000248967	116113
2015	Hunan	0.00111163	4.49231e-05	0.00254901	0.0124856	3.64874e-07	5.21931e-08	2.26672e-09	1.06943e-08	1.37495	0.609226	0.0328817	0.000427816	1.83032e-05	0.691067	7.20942e-05	0.318843	10.8739	0	14191.2	1245.19	28.4266	0.158164	0.000620157	0.754223	0.124823	2.2304e-07	3.39032e-05	6.64408e-07	8.01085e-08	2.08545e-08	1.10343e-08	15479.8
2015	Guangdong	0	0	0	0	0	0	0	0	0	0	0	0	0	0	0	0	0	0	0	0	1157.36	0	0	0	0	0	0	0	0	0	0	1157.36
2015	Guangxi	9.80919e-06	2.00449e-06	0.000113738	4.19858e-05	1.62809e-08	2.32888e-09	1.01142e-10	4.77183e-10	3.49773	0.0805627	0.081919	0.000172857	4.55991e-05	0.00232738	3.34216e-06	0.00107241	0.0364765	498.407	12088	0	24.2136	1.32038	0.0209535	85.9749	14.2302	7.5285e-06	0.000615448	1.20674e-05	1.72494e-06	3.72858e-07	2.30118e-08	12715.9
2015	Hainan	0	0	0	0	0	0	0	0	0	0	0	0	0	0	0	0	0	0	121.802	0	0	0	0	0	0	0	0	0	0	0	0	121.802
2015	Chongqing	0.156146	0.0236823	1.34377	1.01716	0.000192352	2.75148e-05	1.19495e-06	5.63773e-06	144.008	92.6967	40.4177	0.0668472	0.022498	56.3367	0.0393596	25.9775	884.894	1805.45	199.311	9.34131	0.399242	0	226.389	42.0991	0.000936412	0.0813405	6.65021	0.130394	0.0186381	0.00402893	0.000249095	3536.88
2015	Sichuan	60.2678	18.3647	1042.04	1.45653	0.149162	0.0213367	0.00092664	0.00437184	31781.4	39607.9	34659.3	29.497	19.2926	115.254	30.7133	39.3883	378.975	429.271	63.2384	2.25001	0.126673	17050	0	12.0216	0.000225551	74.5675	6095.3	119.514	17.084	3.69272	0.227581	131651
2015	Guizhou	0.00791888	0.00119119	0.06759	0.0520023	9.67507e-06	1.38396e-06	6.01046e-08	2.83571e-07	7.41991	4.69893	2.03146	0.00339058	0.00113079	2.88018	0.00197953	1.3281	45.2411	20622.8	132888	3709.42	266.189	3842.54	11.3529	0	0.371848	0.00407905	0.333495	0.00653902	0.000934663	0.000202043	1.24924e-05	161405
2015	Yunnan	0.180521	0.0548479	3.11216	0.0111581	0.000445485	6.3724e-05	2.7675e-06	1.30569e-05	126861	2825.48	2947.95	6.20678	1.64094	0.72099	0.0917265	0.29149	7.0623	41.3632	262437	1634.06	525.689	57.3059	619.555	412.709	0	0.222604	18.1961	0.35678	0.0510002	0.0110237	0.000679395	398400
2015	Tibet	0.0414491	0.0126332	0.716827	0.000879877	0.000102609	1.46776e-05	6.37441e-07	3.00741e-06	9.62772	11.9948	10.4943	0.00893272	0.00584152	0.0725276	0.428211	0.0324637	0.154358	0.13865	0.0231087	0.000723449	4.62892e-05	5.18989	62.8386	0.00365503	7.25216e-08	0	4.19314	39.1976	1346.26	1.21108	0.0746407	1492.73
2015	Shaanxi	2223.01	677.666	38451.9	42.0485	5.50414	0.787334	0.0341935	0.161323	1272.51	1217.95	888.642	0.897264	0.49465	3605.51	1133.26	1154.72	3794.18	840.825	380.14	4.09311	0.761462	3059.69	5254.18	1.75035	0.00041031	5.043	0	4403.24	416.549	136.051	8.38474	68979.9
2015	Gansu	679.578	207.164	11754.8	12.8578	1.68263	0.240689	0.010453	0.0493168	452.535	451.276	340.639	0.333084	0.189612	1102.4	12259.9	601.425	1162.92	258.053	116.544	1.25651	0.233449	969.176	2019.22	0.55895	0.000125957	822.524	68762.6	0	108382	35410	2182.37	247952
2015	Qinghai	9.45829	2.88328	163.602	0.178976	0.0234186	0.00334989	0.000145484	0.000686385	8.59889	9.14862	7.25084	0.00677158	0.00403608	15.3444	170.555	8.36957	16.2054	3.62101	1.62588	0.0176429	0.00325681	14.7184	43.1323	0.00864713	1.7686e-06	4155.93	957.031	15943.6	0	492.605	30.36	22054.3
2015	Ningxia	87.5593	26.6918	1514.53	1.65625	0.216796	0.0310113	0.00134681	0.00635416	51.0598	49.1385	36.0207	0.0362098	0.0200504	142.016	236517	49.1519	149.489	33.1332	14.9778	0.161296	0.0300022	121.014	213.052	0.069295	1.6169e-05	12.3276	8859.64	17085.3	1615.72	0	32.5341	266613
2015	Xinjiang	12.9486	3.90167	221.387	2.17849	0.0316901	0.00453308	0.000196869	0.000928818	217.037	102.88	11.3933	0.0723916	0.00634195	127.924	230.498	169089	1708.63	142.032	157.74	0.687486	0.315971	40.959	38.0292	0.0234013	6.89165e-05	15.4636	1292.75	21546.3	2037.58	665.711	0	197665
2015	Total inflow	271472	61635.2	882488	48752.8	6918.39	459324	81390.6	69873.5	220689	158826	103588	783.376	264.158	22565.8	352293	181955	27978.7	46652.4	447580	6712.83	2053.66	29027.4	8899.15	558.166	14.7393	5086.59	103126	59524.3	113851	38848.3	2254.7

[truncated: 3 more sheets: Table S10, Table S11, Table S12]
